# Supplementary material for: PRMT5 methylating Smad4 activates TGF-β signaling and promotes colorectal cancer metastasis
Source: Research Square preprint supplement (doi:10.21203/rs.3.rs-2235025/v1), 2022-11-11
Supplement: Supplementary file 1 [file be48f0151c51099131c9d929.xlsx]

## Sheet: Sheet1
Accession	Description	Score	Coverage	# Proteins	# Unique Peptides	# Peptides	# PSMs	Area	# AAs	MW [kDa]	calc. pI
A3RJH1	ATP-dependent RNA helicase DDX1 OS=Homo sapiens OX=9606 GN=DDX1 PE=2 SV=1 - [A3RJH1_HUMAN]	611.659	73.38	4	65	65	240	3.63002e+09	740	82.3798	7.2251
	A2	Sequence	# PSMs	# Proteins	# Protein Groups	Protein Group Accessions	Modifications	ΔCn	Area	q-Value	PEP	XCorr	Charge	MH+ [Da]	ΔM [ppm]	RT [min]	# Missed Cleavages
	High	AAGGGSYKGHVDILAPTVQELAALEK	2	3	1	A3RJH1		0	1.51978e+08	0	1.12e-05	5.43762	2	2595.37	-3.98482	86.8934	1
	High	FLVLDEADGLLSQGYSDFINR	10	4	1	A3RJH1		0	3.04681e+09	0	2.187e-08	5.20476	3	2372.17	-1.0276	103.355	0
	High	KGHQFScVcLHGDRKPHER	1	4	1	A3RJH1	C7(Carbamidomethyl); C9(Carbamidomethyl)	0	1.11626e+07	0	1.647e-06	5.00752	4	2348.12	-2.36611	21.4934	2
	High	TKIDcDNLEQYFIQQGGGPDK	2	4	1	A3RJH1	C5(Carbamidomethyl)	0	8.37389e+07	0	0.0001394	5.00074	2	2426.12	-2.68534	80.5784	1
	High	DQLSVLENGVDIVVGTPGRLDDLVSTGKLNLSQVR	1	4	1	A3RJH1		0	32174093	0	0.0001292	4.81041	3	3706.99	-2.05502	101.912	2
	High	KGHQFScVcLHGDR	2	4	1	A3RJH1	C7(Carbamidomethyl); C9(Carbamidomethyl)	0	6.67216e+07	0	2.599e-06	4.43375	3	1700.77	-1.34021	24.4127	1
	High	TKIDcDNLEQYFIQQGGGPDKK	3	4	1	A3RJH1	C5(Carbamidomethyl)	0	9.89948e+08	0	0.0001394	4.35182	4	2554.22	-1.5573	70.6425	2
	High	GHVDILAPTVQELAALEK	8	3	1	A3RJH1		0	3570481702	0	0.0001394	4.33249	3	1904.05	-1.40468	97.4288	0
	High	VGWSTmQASLDLGTDKFGFGFGGTGK	2	4	1	A3RJH1	M6(Oxidation)	0	3.84783e+08	0	8.071e-06	4.24668	3	2680.27	0.595475	99.2229	1
	High	ImHFPTWVDLKGEDSVPDTVHHVVVPVNPK	5	4	1	A3RJH1	M2(Oxidation)	0	2.93381e+09	0	0.0001394	4.22297	3	3408.73	-2.65128	83.4995	1
	High	DQLSVLENGVDIVVGTPGR	2	4	1	A3RJH1		0	6.6537e+08	0	6.207e-08	4.22142	2	1968.04	-1.44228	101.331	0
	High	FNFGEEEFKFPPKDGFVALSK	20	4	1	A3RJH1		0	8.56964e+07	0	0.0001394	4.07581	4	2433.21	0.859392	92.8999	2
	High	GIDIHGVPYVINVTLPDEKQNYVHR	5	4	1	A3RJH1		0	2.74989e+09	0	0.0001394	3.97606	3	2876.5	-1.41643	86.5935	1
	High	VGWSTmQASLDLGTDK	2	4	1	A3RJH1	M6(Oxidation)	0	2.54217e+08	0	2.009e-05	3.848	2	1724.81	-2.39391	73.0528	0
	High	HYYEVScHDQGLcR	2	3	1	A3RJH1	C7(Carbamidomethyl); C13(Carbamidomethyl)	0	5.6553e+08	0	1.879e-06	3.8473	3	1823.75	-2.52431	31.1643	0
	High	DNTRPGANSPEmWSEAIK	4	4	1	A3RJH1	M12(Oxidation)	0	2.17184e+09	0	0.0001606	3.79806	2	2018.92	-2.22854	54.6842	0
	High	GKHYYEVScHDQGLcR	3	3	1	A3RJH1	C9(Carbamidomethyl); C15(Carbamidomethyl)	0	4.37375e+08	0	2.702e-05	3.71737	2	2008.87	-2.42941	26.436	1
	High	GHVDILAPTVQELAALEKEAQTSFLHLGYLPNQLFR	1	3	1	A3RJH1		0	94392724	0	4.129e-05	3.71275	4	4019.14	-0.856024	102.924	1
	High	ALIVEPSRELAEQTLNNIK	3	4	1	A3RJH1		0	3.69483e+09	0	0.0001394	3.68151	3	2138.18	-2.39151	85.8132	1
	High	AIKEHKmDQAIIFcR	1	4	1	A3RJH1	M7(Oxidation); C14(Carbamidomethyl)	0	7.91036e+06	0	0.0001394	3.66455	2	1875.95	-3.99365	30.4705	2
	High	VGWSTMQASLDLGTDKFGFGFGGTGK	1	4	1	A3RJH1		0	1.22635e+07	0	0.0005109	3.58455	3	2664.26	-5.96004	100.331	1
	High	GEDSVPDTVHHVVVPVNPK	2	4	1	A3RJH1		0	4.9877e+08	0	0.0001394	3.57411	2	2025.03	-2.58448	53.853	0
	High	mHNQIPQVTSDGKR	5	4	1	A3RJH1	M1(Oxidation)	0	1.76233e+09	0	0.0001398	3.54376	2	1626.8	-3.03404	23.5894	1
	High	EAQTSFLHLGYLPNQLFR	4	3	1	A3RJH1		0	1.9879e+09	0	1.447e-05	3.49914	2	2134.11	-0.625202	99.7647	0
	High	TGAFSIPVIQIVYETLKDQQEGK	3	1	1	A3RJH1		0	2.07935e+09	0	0.0001394	3.49661	2	2564.36	-1.5654	102.513	1
	High	LQVIVcSATLHSFDVK	4	4	1	A3RJH1	C6(Carbamidomethyl)	0	2.95952e+08	0	0.0001017	3.45741	2	1816.96	-3.06912	79.203	0
	High	QFDNYGEEFTmHDTIGcYLDIDKGHVK	3	4	1	A3RJH1	M11(Oxidation); C17(Carbamidomethyl)	0	2.41681e+08	0	0.0001477	3.4466	3	3248.42	-2.34016	81.6845	1
	High	NGKDLGLAFEIPPHmK	11	4	1	A3RJH1	M15(Oxidation)	0	4.34878e+07	0	0.0001394	3.43755	3	1782.92	-2.26264	59.9932	1
	High	ELLIIGGVAAR	6	4	1	A3RJH1		0	2.7372e+09	0	0.0001394	3.39611	2	1111.68	-2.12599	79.0549	0
	High	DQLSVLENGVDIVVGTPGRLDDLVSTGK	3	4	1	A3RJH1		0	2.54973e+09	0	0.0002908	3.38858	3	2896.52	-1.71407	102.377	1
	High	GIDIHGVPYVINVTLPDEK	3	4	1	A3RJH1		0	2.11011e+09	0	0.0001394	3.38346	3	2079.11	-0.858822	98.9696	0
	High	GSAFAIGSDGLccQSR	3	4	1	A3RJH1	C12(Carbamidomethyl); C13(Carbamidomethyl)	0	8.27688e+08	0	0.0001394	3.3786	2	1685.73	-1.73268	62.7868	0
	High	MDQAIIFcR	1	4	1	A3RJH1	C8(Carbamidomethyl)	0	1.10372e+08	0	0.0001394	3.35114	2	1153.55	-1.55377	63.9587	0
	High	FNFGEEEFKFPPK	30	4	1	A3RJH1		0	1.21872e+07	0	0.0001394	3.35051	2	1615.78	-2.32896	83.1011	1
	High	RLQVIVcSATLHSFDVK	1	4	1	A3RJH1	C7(Carbamidomethyl)	0	1.43255e+07	0	0.0001394	3.27877	3	1973.06	-2.70164	68.1446	1
	High	mGLAISLVATEK	4	3	1	A3RJH1	M1(Oxidation)	0	593774658	0	0.0001394	3.2627	2	1248.69	-0.928781	71.2721	0
	High	IDcDNLEQYFIQQGGGPDKK	2	4	1	A3RJH1	C3(Carbamidomethyl)	0	2.54209e+08	0	0.0001394	3.20063	2	2325.07	-3.08584	80.2221	1
	High	TGAFSIPVIQIVYETLKDQQEGKK	3	1	1	A3RJH1		0	2.69089e+09	0	0.0001394	3.19253	4	2692.45	-0.45788	102.021	2
	High	MGLAISLVATEK	2	3	1	A3RJH1		0	0	0	0.0001394	3.15241	2	1232.69	-1.59999	82.1015	0
	High	GHQFScVcLHGDRKPHER	2	4	1	A3RJH1	C6(Carbamidomethyl); C8(Carbamidomethyl)	0	5.76223e+07	0	0.0001394	3.12327	4	2220.02	-3.16278	22.6654	1
	High	FGFGFGGTGKK	1	4	1	A3RJH1		0	7.75192e+07	0	0.0001394	3.09339	3	1102.57	-1.89436	44.5537	1
	High	LQVIVcSATLHSFDVKK	2	4	1	A3RJH1	C6(Carbamidomethyl)	0	1.57765e+08	0	0.0001398	2.998	2	1945.06	0.0203008	66.5997	1
	High	GHQFScVcLHGDR	1	4	1	A3RJH1	C6(Carbamidomethyl); C8(Carbamidomethyl)	0	175856153	0	0.0001394	2.98506	2	1572.67	-3.11009	27.5745	0
	High	mGLAISLVATEKEK	4	3	1	A3RJH1	M1(Oxidation)	0	2.79183e+08	0	0.0001394	2.9832	2	1505.82	-2.9568	56.2838	1
	High	VGWSTmQASLDLGTDKFGFGFGGTGKK	2	4	1	A3RJH1	M6(Oxidation)	0	523543739	0	0.0001076	2.9797	4	2808.36	-2.32676	91.1302	2
	High	mHNQIPQVTSDGK	1	4	1	A3RJH1	M1(Oxidation)	0	133745545	0	0.0001797	2.94898	2	1470.7	-1.2499	26.8854	0
	High	NAELKFNFGEEEFKFPPK	4	4	1	A3RJH1		0	1.28021e+07	0	0.0001612	2.87613	3	2171.08	-1.90503	85.9493	2
	High	ImHFPTWVDLK	3	4	1	A3RJH1	M2(Oxidation)	0	2.90061e+08	0	0.0001394	2.78651	3	1402.72	-2.12576	73.3438	0
	High	DLGLAFEIPPHmK	14	4	1	A3RJH1	M12(Oxidation)	0	2.43956e+07	0	0.001923	2.76285	2	1483.76	-2.58151	81.7013	0
	High	TGAFSIPVIQIVYETLK	2	1	1	A3RJH1		0	2.07754e+08	0	0.0001394	2.75963	2	1879.05	-2.23994	103.53	0
	High	FLIcTDVAAR	2	4	1	A3RJH1	C4(Carbamidomethyl)	0	2.63455e+09	0	0.0001394	2.58084	2	1165.6	-1.59163	66.6814	0
	High	mDQAIIFcR	2	4	1	A3RJH1	M1(Oxidation); C8(Carbamidomethyl)	0	9.55761e+08	0	0.0001394	2.45232	2	1169.54	-2.29902	54.8449	0
	High	LRELLIIGGVAAR	5	4	1	A3RJH1		0	3.28839e+08	0	0.0001394	2.44901	3	1380.87	-1.72805	72.6495	1
	High	FGFGFGGTGK	1	4	1	A3RJH1		0	4.9457e+08	0	0.0001394	2.41118	2	974.471	-1.78581	63.9572	0
	High	VPVDEFDGK	1	3	1	A3RJH1		0	2.10421e+08	0	0.0005808	2.21333	2	1005.49	-1.69386	40.6593	0
	High	VWYHVcSSR	2	3	1	A3RJH1	C6(Carbamidomethyl)	0	5.90844e+08	0	0.001245	1.87532	2	1193.55	-3.08145	30.7118	0
	High	TGASVLNKWQmNPYDR	2	1	1	A3RJH1	M11(Oxidation)	0	7.17151e+07	0.001	0.004027	2.87975	3	1895.9	-3.0804	54.2615	1
	High	MHNQIPQVTSDGKR	1	4	1	A3RJH1		0	5.30659e+06	0.001	0.005401	2.76212	2	1610.8	-1.37091	25.6536	1
	High	ILKGEYAVR	3	4	1	A3RJH1		0	1.26822e+09	0.001	0.007069	2.44361	3	1048.61	-2.74275	28.1674	1
	High	VGWSTMQASLDLGTDK	1	4	1	A3RJH1		0	2.09142e+06	0.001	0.006534	2.34266	2	1708.82	-1.74885	87.9461	0
	High	ELAEQTLNNIK	2	4	1	A3RJH1		0	3624755551	0.001	0.004015	1.58882	2	1272.68	-1.12769	52.6473	0
	High	LDDLVSTGK	1	4	1	A3RJH1		0	1210013410	0.002	0.009174	2.81163	2	947.501	-3.55261	38.1947	0
	High	WQmNPYDR	1	3	1	A3RJH1	M3(Oxidation)	0	159491177	0.002	0.007697	1.39629	2	1125.48	-2.5384	32.8525	0
	High	APDGYIVK	2	4	1	A3RJH1		0	2994526118	0.003	0.01725	2.10908	2	862.465	-2.50679	33.4528	0
	High	FLPNAPK	1	4	1	A3RJH1		0	2779121536	0.003	0.01736	0.64155	2	786.448	-3.38554	34.271	0
	High	NQALFPAcVLK	2	4	1	A3RJH1	C8(Carbamidomethyl)	0	1505210389	0.004	0.03701	2.12414	2	1260.67	-2.3539	75.2337	0
	High	KYIDNPKLR	1	4	1	A3RJH1		0	3704646	0.005	0.04805	1.76193	3	1146.66	-2.48671	25.2278	2
	High	LNLSQVR	1	4	1	A3RJH1		0	2.79584e+09	0.005	0.04729	1.25392	2	829.487	-2.86973	35.8747	0
	High	MGLAISLVATEKEK	1	3	1	A3RJH1		0	1.12524e+07	0.006	0.06756	2.62789	3	1489.83	-1.02343	65.8744	1
	High	FNFGEEEFK	1	4	1	A3RJH1		0	1.65095e+08	0.007	0.08148	1.67691	2	1146.51	-2.74191	66.1209	0
	High	ALIVEPSR	1	4	1	A3RJH1		0	2.30011e+09	0.009	0.09678	1.54984	2	884.518	-2.66195	40.0061	0
P09874	Poly [ADP-ribose] polymerase 1 OS=Homo sapiens OX=9606 GN=PARP1 PE=1 SV=4 - [PARP1_HUMAN]	576.814	65.58	8	72	72	220	4.95384e+09	1014	113.012	8.88037
	A2	Sequence	# PSMs	# Proteins	# Protein Groups	Protein Group Accessions	Modifications	ΔCn	Area	q-Value	PEP	XCorr	Charge	MH+ [Da]	ΔM [ppm]	RT [min]	# Missed Cleavages
	High	RQIQAAYSILSEVQQAVSQGSSDSQILDLSNR	2	3	1	P09874		0	2.79916e+08	0	3.816e-07	6.71863	3	3491.75	-5.04998	101.092	1
	High	NTHATTHNAYDLEVIDIFKIER	7	3	1	P09874		0	4.49928e+08	0	1.314e-08	5.16981	3	2600.3	-3.11118	84.1951	1
	High	KFYPLEIDYGQDEEAVKK	6	2	1	P09874		0	3430080719	0	1.742e-09	4.90095	3	2172.08	-1.59184	65.0935	2
	High	NTHATTHNAYDLEVIDIFK	6	3	1	P09874		0	1.41508e+09	0	4.714e-09	4.7512	2	2202.08	-0.255418	80.5573	0
	High	SLQELFLAHILSPWGAEVK	3	3	1	P09874		0	1.88677e+09	0	0.0001394	4.66402	4	2138.16	-2.3313	101.648	0
	High	VVSEDFLQDVSASTK	7	3	1	P09874		0	5.05479e+09	0	4.684e-07	4.5894	2	1624.8	-2.00704	79.5667	0
	High	HPDVEVDGFSELR	6	7	1	P09874		0	1.38891e+09	0	0.0001394	4.55357	3	1499.71	-1.94164	62.5528	0
	High	KFYPLEIDYGQDEEAVK	2	2	1	P09874		0	1.66233e+09	0	4.303e-07	4.44242	3	2043.99	-2.11	77.145	1
	High	VVDRDSEEAEIIR	4	3	1	P09874		0	2.15923e+09	0	0.0001394	4.1823	3	1530.77	-2.47092	40.2171	1
	High	VVDRDSEEAEIIRK	4	2	1	P09874		0	2.02626e+09	0	0.0001394	4.17869	3	1658.87	-2.64763	31.191	2
	High	VEmLDNLLDIEVAYSLLR	3	3	1	P09874	M3(Oxidation)	0	1.76648e+08	0	4.18e-07	4.15496	3	2122.11	-1.55064	103.117	0
	High	GGSDDSSKDPIDVNYEK	8	3	1	P09874		0	3.00301e+09	0	1.31e-05	4.13953	2	1825.8	-2.51755	41.3612	1
	High	GGAAVDPDSGLEHSAHVLEK	10	3	1	P09874		0	4354510599	0	3.901e-06	4.03832	2	1988.96	-3.05791	49.1921	0
	High	NREELGFRPEYSASQLK	6	5	1	P09874		0	4.29593e+09	0	0.0001394	3.98676	3	2024.01	-2.55029	49.6755	1
	High	AQNDLIWNIKDELKK	5	3	1	P09874		0	8.51039e+08	0	0.0001394	3.98467	2	1827.99	-3.41982	69.0795	2
	High	GFSLLATEDKEALKK	6	6	1	P09874		0	5.44691e+09	0	0.0001394	3.98234	2	1649.91	-0.970928	50.277	2
	High	AmVEYEIDLQK	4	3	1	P09874	M2(Oxidation)	0	969375376	0	0.0001394	3.95094	2	1354.65	-2.90197	60.0693	0
	High	KmVDPEKPQLGmIDR	1	5	1	P09874	M2(Oxidation); M12(Oxidation)	0	86169296	0	0.0001394	3.93785	4	1788.89	-2.14062	35.1522	1
	High	IAPPEAPVTGYmFGK	3	3	1	P09874	M12(Oxidation)	0	2.35266e+09	0	4.973e-05	3.91037	3	1593.79	-3.50711	73.5598	0
	High	LEQmPSKEDAIEHFmK	4	3	1	P09874	M4(Oxidation); M15(Oxidation)	0	1.79975e+08	0	0.0001394	3.89106	3	1964.9	-2.51373	39.572	1
	High	EELGFRPEYSASQLK	2	5	1	P09874		0	3.84379e+08	0	0.0003866	3.86195	2	1753.87	-2.75742	60.0231	0
	High	KVcSTNDLKELLIFNK	2	3	1	P09874	C3(Carbamidomethyl)	0	6.02332e+07	0	0.0001023	3.85844	3	1922.04	0.357024	72.2946	2
	High	QIQAAYSILSEVQQAVSQGSSDSQILDLSNR	1	3	1	P09874		0	1.79896e+08	0	0.0001394	3.83203	4	3335.67	-1.37918	102.773	0
	High	TTNFAGILSQGLR	7	3	1	P09874		0	3.93446e+09	0	4.642e-05	3.7736	2	1377.75	-2.54661	85.4119	0
	High	VFSATLGLVDIVK	7	3	1	P09874		0	1.4258e+09	0	2.232e-06	3.77333	3	1361.8	-0.330702	99.3994	0
	High	RKGDEVDGVDEVAK	5	6	1	P09874		0	4.42167e+08	0	0.0001394	3.7093	2	1516.76	-2.87741	25.4914	2
	High	KGDEVDGVDEVAK	6	6	1	P09874		0	1054798297	0	0.0001394	3.70156	2	1360.65	-3.80188	28.0875	1
	High	AQNDLIWNIKDELK	3	3	1	P09874		0	6.29494e+08	0	3.915e-05	3.68029	2	1699.9	-0.66189	81.3466	1
	High	mAImVQSPmFDGK	1	7	1	P09874	M1(Oxidation); M4(Oxidation); M9(Oxidation)	0	1.70215e+08	0	0.0001394	3.53676	2	1502.67	-2.28489	55.9604	0
	High	TLGDFAAEYAK	5	5	1	P09874		0	3937485539	0	0.0001394	3.47138	2	1185.58	-1.87055	65.2858	0
	High	KPPLLNNADSVQAK	6	3	1	P09874		0	1.84352e+09	0	0.000134	3.45938	3	1494.83	-1.42407	34.9372	0
	High	FYTLIPHDFGmKKPPLLNNADSVQAK	3	3	1	P09874	M11(Oxidation)	0	1.28047e+09	0	0.0002297	3.35597	3	2960.53	-1.80598	77.0991	1
	High	GFSLLATEDKEALK	1	6	1	P09874		0	6.40749e+07	0	0.0001394	3.30914	2	1521.81	-1.5344	63.3768	1
	High	VGHSIRHPDVEVDGFSELR	3	7	1	P09874		0	241764481	0	0.0001394	3.22155	2	2149.08	-1.55806	53.7309	1
	High	KGDEVDGVDEVAKK	2	6	1	P09874		0	4.31858e+07	0	0.001748	3.17871	2	1488.75	-1.4244	25.3973	2
	High	FYPLEIDYGQDEEAVK	2	3	1	P09874		0	1.24588e+08	0	9.156e-07	3.1471	2	1915.89	-2.37185	91.4489	0
	High	FYPLEIDYGQDEEAVKK	1	3	1	P09874		0	663335117	0	0.0001566	2.99235	2	2043.98	-3.11869	76.5907	1
	High	GDEVDGVDEVAK	1	6	1	P09874		0	31142779	0	0.0001394	2.8771	2	1232.56	-2.41487	41.2431	0
	High	VcSTNDLKELLIFNK	1	3	1	P09874	C2(Carbamidomethyl)	0	2.26719e+08	0	0.0008059	2.86203	3	1793.94	-3.15626	85.0118	1
	High	AMVEYEIDLQK	1	3	1	P09874		0	5.46304e+06	0	0.0001394	2.78549	2	1338.66	2.74837	69.0852	0
	High	AmVEYEIDLQKmPLGK	3	3	1	P09874	M2(Oxidation); M12(Oxidation)	0	854010136	0	0.0001394	2.6716	2	1896.94	-2.07169	64.2531	1
	High	SKLPKPVQDLIK	5	3	1	P09874		0	4.35982e+09	0	0.000564	2.62624	2	1365.84	-2.8586	49.7071	1
	High	ASLcISTKK	1	2	1	P09874	C4(Carbamidomethyl)	0	2.04665e+08	0	0.0004376	2.61114	2	1007.55	-1.72477	23.9359	1
	High	RLLWHGSR	1	3	1	P09874		0	1.20307e+08	0	0.002331	2.59014	3	1024.58	-1.21302	24.266	1
	High	GIYFADmVSK	1	3	1	P09874	M7(Oxidation)	0	1.54269e+09	0	0.001775	2.5666	2	1146.55	-2.49406	55.7849	0
	High	VPHWYHFScFWK	4	7	1	P09874	C9(Carbamidomethyl)	0	3.72613e+08	0	0.0002859	2.5419	2	1693.77	-1.91181	71.3643	0
	High	LQLLEDDKENR	3	3	1	P09874		0	1.67575e+09	0	0.0001394	2.53951	2	1372.7	-2.87383	38.6091	1
	High	QQVPSGESAILDR	3	3	1	P09874		0	2.65825e+09	0	0.0004087	2.51912	2	1399.71	-2.40785	50.6754	0
	High	LPKPVQDLIK	3	3	1	P09874		0	2.94966e+08	0	0.0003324	2.35325	3	1150.72	-1.7197	56.8785	0
	High	AEPVEVVAPR	2	3	1	P09874		0	4276036305	0	0.0001598	2.32687	2	1066.59	-2.09982	43.9204	0
	High	GGKVFSATLGLVDIVK	1	3	1	P09874		0	1.57291e+07	0	0.0001653	2.22926	3	1603.94	-3.11642	87.7537	1
	High	FYTLIPHDFGmK	4	3	1	P09874	M11(Oxidation)	0	8.43488e+08	0	0.0008874	2.20155	2	1484.72	-3.13474	73.0313	0
	High	LQLLEDDKENRYWIFR	2	3	1	P09874		0	1.04588e+08	0	0.0001462	2.16055	4	2138.1	-2.09057	86.0432	2
	High	KmEEVKEANIR	4	3	1	P09874	M2(Oxidation)	0	5.35374e+07	0	0.002112	2.05309	2	1362.7	-2.88039	20.9923	2
	High	TDIKVVDRDSEEAEIIR	2	3	1	P09874		0	2.3609e+07	0	0.002151	1.79414	4	1988.03	-1.60632	53.9912	2
	High	VGTVIGSNKLEQmPSKEDAIEHFmK	4	3	1	P09874	M13(Oxidation); M24(Oxidation)	0	2.46591e+09	0.001	0.005712	2.84972	4	2820.39	-1.30678	53.467	2
	High	VGTVIGSNKLEQmPSK	1	3	1	P09874	M13(Oxidation)	0	1.22162e+07	0.001	0.007069	2.71706	2	1703.9	-1.95223	36.3461	1
	High	SDAYYcTGDVTAWTK	1	3	1	P09874	C6(Carbamidomethyl)	0	8.31684e+08	0.001	0.006401	2.64436	2	1737.74	-0.658725	71.5101	0
	High	AQNDLIWNIK	1	3	1	P09874		0	9.55892e+07	0.001	0.004282	2.49349	2	1214.65	-0.981658	71.4656	0
	High	ASLcISTK	1	2	1	P09874	C4(Carbamidomethyl)	0	4.19478e+08	0.001	0.006906	2.4082	2	879.458	-3.29541	30.6765	0
	High	VADGmVFGALLPcEEcSGQLVFK	1	3	1	P09874	M5(Oxidation); C13(Carbamidomethyl); C16(Carbamidomethyl)	0	2.29144e+08	0.001	0.007069	2.26333	2	2543.2	-1.04758	100.444	0
	High	GFSLLATEDK	1	6	1	P09874		0	1.26598e+08	0.001	0.006559	2.13796	2	1080.55	-2.18789	62.2538	0
	High	HPDVEVDGFSELRWDDQQK	2	7	1	P09874		0	6.7403e+07	0.002	0.007069	2.5478	3	2300.05	-2.3995	74.5416	1
	High	VGHSIRHPDVEVDGFSELRWDDQQK	1	7	1	P09874		0	7.61226e+06	0.002	0.009952	1.93189	4	2949.42	-1.5627	64.2125	2
	High	mVDPEKPQLGmIDR	2	5	1	P09874	M1(Oxidation); M11(Oxidation)	0	1343217506	0.002	0.009403	1.80336	3	1660.8	-2.22455	45.2628	0
	High	ELLIFNK	2	3	1	P09874		0	822391925	0.002	0.01012	1.77283	2	876.517	-2.30111	66.3915	0
	High	LYRVEYAK	1	7	1	P09874		0	5.94307e+07	0.002	0.007201	1.76557	3	1041.57	-1.54639	27.9958	1
	High	mEEVKEANIR	1	3	1	P09874	M1(Oxidation)	0	7.74146e+07	0.003	0.02136	1.56031	3	1234.61	-2.54802	23.4814	1
	High	IFPPETSASVAATPPPSTASAPAAVNSSASADKPLSNmK	1	3	1	P09874	M38(Oxidation)	0	2.03624e+09	0.005	0.05234	2.03372	3	3783.87	-1.81382	73.8467	0
	High	SANYcHTSQGDPIGLILLGEVALGNmYELK	1	3	1	P09874	C5(Carbamidomethyl); M26(Oxidation)	0	460974	0.005	0.04967	1.80433	3	3279.59	-3.06681	110.517	0
	High	WYHPGcFVK	1	5	1	P09874	C6(Carbamidomethyl)	0	8.03277e+07	0.007	0.07999	1.70294	3	1193.55	-1.20203	44.9269	0
	High	mIFDVESmK	1	3	1	P09874	M1(Oxidation); M8(Oxidation)	0	2.7335e+07	0.008	0.09197	1.38498	2	1131.5	-2.89534	48.0184	0
	High	LLWHGSR	1	3	1	P09874		0	8.95013e+08	0.009	0.1017	1.70072	2	868.477	-2.62786	27.4607	0
P12956	X-ray repair cross-complementing protein 6 OS=Homo sapiens OX=9606 GN=XRCC6 PE=1 SV=2 - [XRCC6_HUMAN]	366.422	66.67	18	57	57	149	4.26238e+09	609	69.7991	6.63916
	A2	Sequence	# PSMs	# Proteins	# Protein Groups	Protein Group Accessions	Modifications	ΔCn	Area	q-Value	PEP	XCorr	Charge	MH+ [Da]	ΔM [ppm]	RT [min]	# Missed Cleavages
	High	NLEALALDLmEPEQAVDLTLPK	2	6	1	P12956	M10(Oxidation)	0	8.80872e+08	0	2.798e-07	5.44796	3	2439.27	-1.01044	101.91	0
	High	TEGDEEAEEEQEENLEASGDYKYSGR	1	2	1	P12956		0	1.08728e+08	0	0.0001394	4.83669	3	2964.21	-2.22413	54.8112	1
	High	TEGDEEAEEEQEENLEASGDYK	3	2	1	P12956		0	2.32741e+08	0	1.042e-06	4.80158	3	2500.99	-2.00817	55.3006	0
	High	IISSDRDLLAVVFYGTEKDK	2	3	1	P12956		0	4.00812e+08	0	0.0001394	4.54505	3	2269.2	-2.01183	93.253	2
	High	IQVTPPGFQLVFLPFADDKRK	1	6	1	P12956		0	72820402	0	0.0001394	4.52794	4	2416.34	-1.55094	100.158	2
	High	ImLFTNEDNPHGNDSAK	4	4	1	P12956	M2(Oxidation)	0	1.82311e+09	0	1.493e-05	4.26251	2	1918.86	-1.15726	43.9787	0
	High	NIYVLQELDNPGAK	4	4	1	P12956		0	2.50522e+09	0	1.36e-05	4.2258	2	1573.82	-2.66397	81.642	0
	High	DIISIAEDEDLRVHFEESSKLEDLLR	12	5	1	P12956		0	4.50786e+06	0	0.0001394	4.18698	3	3071.56	3.06553	108.9	2
	High	IQVTPPGFQLVFLPFADDK	1	6	1	P12956		0	1.49589e+07	0	4.646e-05	4.17682	3	2132.14	-2.70351	103.139	0
	High	ILELDQFKGQQGQK	2	4	1	P12956		0	3.29651e+08	0	0.0001394	4.11098	2	1631.87	-2.05134	52.5699	1
	High	IQVTPPGFQLVFLPFADDKR	2	6	1	P12956		0	2.74603e+08	0	1.379e-07	4.08583	2	2288.24	-3.28007	101.465	1
	High	VHFEESSKLEDLLR	6	5	1	P12956		0	1.18913e+09	0	2.2e-05	4.02635	2	1701.88	-2.6765	68.6131	1
	High	ILELDQFKGQQGQKR	1	4	1	P12956		0	16173101	0	0.0001394	3.95212	2	1787.97	-1.0103	43.0357	2
	High	DSLIFLVDASK	8	2	1	P12956		0	2.55664e+09	0	0.0001394	3.87526	2	1207.66	-1.54382	97.7089	0
	High	RLGSLVDEFKELVYPPDYNPEGK	1	5	1	P12956		0	146906232	0	0.0001394	3.83913	3	2665.35	-2.19687	99.405	2
	High	FDDPGLmLmGFKPLVLLKK	3	5	1	P12956	M7(Oxidation); M9(Oxidation)	0	3.38557e+08	0	0.0001394	3.82777	4	2194.2	-2.45356	96.3149	1
	High	QIILEKEETEELK	1	5	1	P12956		0	9.30727e+07	0	0.0002071	3.7931	2	1601.86	-3.11971	48.7502	1
	High	QIILEKEETEELKR	3	5	1	P12956		0	1.5206e+09	0	0.0001394	3.74847	3	1757.96	-2.07784	41.873	2
	High	LNKDIVISVGIYNLVQK	2	5	1	P12956		0	9.72556e+07	0	0.0001394	3.56498	3	1916.12	-2.76349	92.1095	1
	High	SGLKKQELLEALTK	3	6	1	P12956		0	2.53372e+08	0	0.0001955	3.52347	2	1557.92	-2.77014	49.6945	2
	High	SDSFENPVLQQHFR	4	6	1	P12956		0	5.30478e+09	0	0.0001394	3.49194	2	1703.81	-2.80889	61.8855	0
	High	TFNTSTGGLLLPSDTK	1	5	1	P12956		0	372943906	0	7.795e-05	3.42789	2	1651.85	-2.21936	75.405	0
	High	KQELLEALTK	4	6	1	P12956		0	1864067493	0	0.0001417	3.41046	3	1172.69	-2.47186	48.286	1
	High	VEYSEEELKTHISK	5	6	1	P12956		0	3.36439e+09	0	0.0007386	3.39303	2	1691.85	-2.18282	38.8071	1
	High	TFNTSTGGLLLPSDTKR	9	4	1	P12956		0	4.11797e+09	0	0.0001394	3.36181	2	1807.95	-2.66073	62.0978	1
	High	NIPPYFVALVPQEEELDDQKIQVTPPGFQLVFLPFADDKR	1	6	1	P12956		0	2.4785e+08	0	0.0002108	3.29617	5	4613.38	-3.33472	102.922	2
	High	DLLAVVFYGTEK	1	3	1	P12956		0	5.88637e+07	0	0.0001394	3.26499	2	1354.72	-1.32349	101.556	0
	High	DIISIAEDEDLR	4	5	1	P12956		0	1913295784	0	0.0001394	3.19827	2	1388.69	-2.8749	89.8292	0
	High	AGDLRDTGIFLDLmHLK	3	5	1	P12956	M14(Oxidation)	0	1.0514e+08	0	7.238e-05	3.17102	3	1931	-1.94256	86.6047	1
	High	KPGGFDISLFYR	6	5	1	P12956		0	1.81638e+09	0	0.003164	3.13601	3	1399.73	-3.60434	81.8088	0
	High	ALKPPPIKLYR	2	5	1	P12956		0	2.75736e+07	0	0.0001394	3.08371	3	1295.82	-1.60372	45.6944	1
	High	RImLFTNEDNPHGNDSAK	2	4	1	P12956	M3(Oxidation)	0	128799438	0	0.0001394	3.06682	2	2074.95	-3.73963	35.4342	1
	High	DTGIFLDLmHLK	7	5	1	P12956	M9(Oxidation)	0	546605790	0	0.0001394	2.99204	2	1418.73	-1.78955	90.3341	0
	High	LYRETNEPVK	1	5	1	P12956		0	5.08568e+07	0	0.0001394	2.97365	3	1248.66	-2.41356	23.5988	1
	High	ILELDQFK	3	4	1	P12956		0	2.37196e+09	0	0.002293	2.95121	2	1005.56	-2.30678	71.1529	0
	High	RFDDPGLmLmGFKPLVLLK	1	5	1	P12956	M8(Oxidation); M10(Oxidation)	0	9.78524e+06	0	0.0001394	2.87361	4	2222.21	1.73127	98.7251	1
	High	RILELDQFKGQQGQK	2	4	1	P12956		0	7.38072e+07	0	0.0003009	2.77539	2	1787.97	-1.41994	43.5505	2
	High	YSGRDSLIFLVDASK	1	2	1	P12956		0	3.94899e+07	0	0.0001394	2.64154	3	1670.87	-2.06373	80.2923	1
	High	ELVYPPDYNPEGK	4	5	1	P12956		0	2.16094e+09	0	0.0001394	2.62699	3	1520.72	-2.60291	64.1614	0
	High	VHFEESSKLEDLLRK	3	5	1	P12956		0	1.72474e+08	0	0.0002223	2.61023	4	1829.97	-3.23723	59.3388	2
	High	DTGIFLDLMHLK	1	5	1	P12956		0	1.10694e+07	0	0.0001394	2.49667	3	1402.74	-1.8549	100.488	0
	High	RILELDQFK	2	4	1	P12956		0	4.5347e+08	0	0.0001394	2.30407	3	1161.66	-3.12488	57.1015	1
	High	FDDPGLmLmGFKPLVLLK	1	5	1	P12956	M7(Oxidation); M9(Oxidation)	0	1.14917e+08	0	0.0001394	2.28274	2	2066.1	-1.5886	100.227	0
	High	NIYVLQELDNPGAKR	2	4	1	P12956		0	2.30867e+08	0	0.00254	2.20812	2	1729.92	-3.64965	67.6353	1
	High	LGSLVDEFK	2	6	1	P12956		0	1.464e+09	0	0.0001591	2.19868	2	1007.54	-1.35478	66.9975	0
	High	TRTFNTSTGGLLLPSDTKR	1	4	1	P12956		0	1.30077e+08	0	0.0003751	2.1759	3	2065.1	-2.7479	51.1576	2
	High	NIPPYFVALVPQEEELDDQK	2	6	1	P12956		0	1.26943e+08	0	0.0001738	2.03398	2	2344.17	0.261507	100.715	0
	High	VEYSEEELK	1	6	1	P12956		0	4.48977e+08	0.001	0.005313	2.05161	2	1125.53	-3.14331	36.2242	0
	High	DLLAVVFYGTEKDK	1	3	1	P12956		0	9.80485e+06	0.001	0.00618	1.89046	3	1597.85	-1.11285	98.6397	1
	High	RFDDPGLmLmGFKPLVLLKK	1	5	1	P12956	M8(Oxidation); M10(Oxidation)	0	1.1668e+07	0.002	0.007137	2.72721	3	2350.3	-2.6939	87.4843	2
	High	ImATPEQVGK	2	6	1	P12956	M2(Oxidation)	0	1665186158	0.002	0.007069	2.60117	2	1089.56	-2.6665	28.3386	0
	High	DIISIAEDEDLRVHFEESSK	1	5	1	P12956		0	0	0.002	0.007635	2.08523	3	2332.13	-1.86506	108.907	1
	High	cLEKEVAALcR	1	5	1	P12956	C1(Carbamidomethyl); C10(Carbamidomethyl)	0	2.48532e+07	0.002	0.007069	1.74725	2	1348.67	-2.66127	45.9342	1
	High	ALKPPPIK	1	5	1	P12956		0	1.10525e+09	0.002	0.007069	1.56151	2	863.569	-2.70271	27.7209	0
	High	LEDLLR	1	17	1	P12956		0	211233306	0.004	0.04158	1.60067	2	758.439	-1.77028	45.8468	0
	High	QELLEALTK	1	6	1	P12956		0	3.4396e+08	0.005	0.05085	1.6389	2	1044.59	-2.49985	65.8761	0
	High	LYRETNEPVKTK	1	5	1	P12956		0	2.30045e+07	0.006	0.07121	2.4529	3	1477.8	-2.27382	22.3083	2
	High	FTVPmLK	1	6	1	P12956	M5(Oxidation)	0	5.31437e+08	0.006	0.0597	1.46805	2	851.468	-2.21657	59.8997	0
P78527	DNA-dependent protein kinase catalytic subunit OS=Homo sapiens OX=9606 GN=PRKDC PE=1 SV=3 - [PRKDC_HUMAN]	353.377	32.24	4	115	115	148	2.80039e+08	4128	468.788	7.12256
	A2	Sequence	# PSMs	# Proteins	# Protein Groups	Protein Group Accessions	Modifications	ΔCn	Area	q-Value	PEP	XCorr	Charge	MH+ [Da]	ΔM [ppm]	RT [min]	# Missed Cleavages
	High	DVLIQGLIDENPGLQLIIR	2	1	1	P78527		0	2.7424e+07	0	1.502e-07	5.56128	3	2119.21	-1.43434	103.628	0
	High	AGLLHNILPSQSTDLHHSVGTELLSLVYK	2	1	1	P78527		0	84752026	0	1.82171e-12	5.15363	4	3142.69	-0.0112638	99.1944	0
	High	SSFDWLTGSSTDPLVDHTSPSSDSLLFAHKR	1	1	1	P78527		0	1.92999e+07	0	4.286e-05	4.95286	3	3390.61	-3.40455	95.6292	1
	High	LLLQGEADQSLLTFIDK	2	1	1	P78527		0	3.6417e+07	0	1.698e-06	4.79794	2	1904.03	-1.71317	101.184	0
	High	ILELSGSSSEDSEKVIAGLYQR	2	1	1	P78527		0	1.1108e+08	0	8.151e-08	4.74195	2	2381.21	-3.49909	87.7044	1
	High	NLDLAVLELmQSSVDNTK	1	1	1	P78527	M10(Oxidation)	0	20512722	0	1.297e-06	4.42723	2	2006.01	0.248243	98.4777	0
	High	LLQIIERYPEETLSLmTK	1	1	1	P78527	M16(Oxidation)	0	1.73718e+08	0	1.487e-05	4.42147	3	2193.18	-2.50393	89.4999	1
	High	TVSLLDENNVSSYLSK	1	1	1	P78527		0	2.08502e+08	0	2.678e-06	4.12467	2	1768.89	-3.09491	88.7505	0
	High	mVSAVLNGmLDQSFR	3	1	1	P78527	M1(Oxidation); M9(Oxidation)	0	45566736	0	7.001e-07	4.07516	2	1699.81	-4.40697	73.8523	0
	High	KEEENASVIDSAELQAYPALVVEK	2	1	1	P78527		0	280489559	0	0.0001394	4.04459	3	2632.33	-2.91393	90.2891	1
	High	KGGSWIQEINVAEK	1	1	1	P78527		0	65180995	0	6.634e-05	4.0085	2	1558.82	-2.28766	59.095	1
	High	mKLSDFNDITNmLLLK	5	1	1	P78527	M1(Oxidation); M12(Oxidation)	0	4.11946e+07	0	3.566e-05	3.94603	3	1927.98	-1.04508	93.9528	1
	High	VYELLGLLGEVHPSEmINNAENLFR	1	2	1	P78527	M16(Oxidation)	0	1.33405e+08	0	4.457e-06	3.91092	3	2873.45	-1.03551	101.304	0
	High	TVGALQVLGTEAQSSLLK	3	1	1	P78527		0	1.27811e+08	0	0.0001394	3.88227	3	1815.02	-2.81334	97.6558	0
	High	KNILEESLcELVAK	2	1	1	P78527	C9(Carbamidomethyl)	0	2.39726e+07	0	0.0001394	3.87813	2	1645.88	-1.2068	92.2664	1
	High	LcYDAFTENmAGENQLLER	1	1	1	P78527	C2(Carbamidomethyl); M10(Oxidation)	0	2.67096e+07	0	2.489e-07	3.84151	2	2290	-3.64142	84.8275	0
	High	ATQQQHDFTLTQTADGR	1	1	1	P78527		0	4.34722e+07	0	0.0001394	3.78028	2	1917.9	-2.00253	37.4691	0
	High	SQGcSEQVLTVLK	1	1	1	P78527	C4(Carbamidomethyl)	0	9.63392e+07	0	0.0001394	3.66851	2	1448.74	-2.55174	60.0439	0
	High	ILELSGSSSEDSEK	1	1	1	P78527		0	1.02792e+08	0	0.0001394	3.63924	2	1480.7	-2.01219	43.7667	0
	High	RILELSGSSSEDSEK	1	1	1	P78527		0	20893976	0	2.504e-05	3.55092	2	1636.8	-2.66862	35.1765	1
	High	NKLQYFmEQFYGIIR	1	2	1	P78527	M7(Oxidation)	0	1.74188e+07	0	0.0001394	3.45061	3	1965.98	-2.27976	91.8667	1
	High	SLEYcSTASIDSENPPDLNK	1	1	1	P78527	C5(Carbamidomethyl)	0	1.4017e+07	0	3.635e-05	3.44177	2	2240	-2.36491	68.7602	0
	High	ImEFTTTLLNTSPEGWK	2	1	1	P78527	M2(Oxidation)	0	4.01139e+07	0	3.748e-05	3.34737	2	1983.97	-1.65224	96.2805	0
	High	LNESTFDTQITKK	2	1	1	P78527		0	40658837	0	0.0001394	3.34279	2	1524.78	-3.77478	41.7334	1
	High	GHDEREHPFLVK	3	1	1	P78527		0	9.03002e+07	0	0.003391	3.28899	3	1463.74	-2.69191	24.9421	1
	High	VVQmLGSLGGQINK	2	2	1	P78527	M4(Oxidation)	0	1.13569e+08	0	0.0001394	3.211	2	1459.79	-2.54806	55.2233	0
	High	HSSLITPLQAVAQR	2	1	1	P78527		0	1.10689e+08	0	0.0001394	3.16848	3	1520.85	-1.81057	61.4443	0
	High	AIRPQIDLKR	1	2	1	P78527		0	122097362	0	0.0001394	3.16367	3	1209.74	-2.52421	31.1774	1
	High	EmKPVIFLDVFLPR	1	2	1	P78527	M2(Oxidation)	0	2.63101e+07	0	0.0001394	3.15908	3	1719.95	-1.83063	100.451	0
	High	SDPGLLTNTmDVFVK	1	2	1	P78527	M10(Oxidation)	0	4.99957e+07	0	0.0001394	3.13397	2	1652.82	-1.68074	83.4588	0
	High	mKQDAQVVLYR	2	1	1	P78527	M1(Oxidation)	0	6.07879e+07	0	0.001728	3.06123	3	1366.71	-3.18535	32.1968	1
	High	VEQLFQVmNGILAQDSAcSQR	1	1	1	P78527	M8(Oxidation); C18(Carbamidomethyl)	0	0	0	0.0001057	3.01885	3	2410.15	0.106153	87.7516	0
	High	LGLIEWLENTVTLK	1	1	1	P78527		0	1.2181e+07	0	2.867e-05	2.96823	2	1628.92	-0.694375	103.517	0
	High	ELLNPVVEFVSHPSTTcR	1	1	1	P78527	C17(Carbamidomethyl)	0	11061021	0	0.0002545	2.95143	2	2085.04	-1.13766	88.791	0
	High	VTELALTASDR	1	2	1	P78527		0	2.57436e+08	0	0.0001394	2.95059	2	1175.62	-2.34117	48.1012	0
	High	TRDDWLVSWVQSYcR	1	1	1	P78527	C14(Carbamidomethyl)	0	1.13285e+07	0	0.001719	2.94712	2	1970.92	3.37952	99.1232	1
	High	NLSSNEAISLEEIR	1	2	1	P78527		0	1.66358e+08	0	0.0001394	2.94483	2	1574.8	-1.89957	71.635	0
	High	DVDFmYVELIQR	1	2	1	P78527	M5(Oxidation)	0	2.68549e+07	0	0.0001394	2.94478	2	1543.75	-0.180789	99.4413	0
	High	mDPmNIWDDIITNR	1	1	1	P78527	M1(Oxidation); M4(Oxidation)	0	3.79843e+07	0	2.917e-06	2.94442	2	1765.79	-0.819123	99.1964	0
	High	RYNFPVEVEVPmER	1	1	1	P78527	M12(Oxidation)	0	31711008	0	0.0007738	2.93021	3	1780.87	-1.75845	70.7807	1
	High	AQEPESGLSEETQVK	2	1	1	P78527		0	225461258	0	0.000215	2.92135	2	1631.77	-3.3129	40.3865	0
	High	LNESTFDTQITK	1	1	1	P78527		0	7.42027e+07	0	0.0001791	2.90473	2	1396.69	-2.46089	53.8547	0
	High	SDPGLLTNTmDVFVKEPSFDWK	1	2	1	P78527	M10(Oxidation)	0	7.22876e+07	0	0.0002625	2.90388	3	2542.22	0.476201	99.2158	1
	High	EQQHVmEELFQSSFR	2	1	1	P78527	M6(Oxidation)	0	45357195	0	0.0002638	2.88539	3	1910.87	-2.04628	60.4924	0
	High	LYSLALHPNAFK	2	2	1	P78527		0	7.38904e+07	0	0.0001394	2.79048	2	1373.75	-3.57281	62.9907	0
	High	GGSWIQEINVAEK	1	1	1	P78527		0	9.41807e+07	0	0.0001394	2.78516	2	1430.73	-1.12784	74.7965	0
	High	NILAFRDQNILLGTTYR	1	1	1	P78527		0	2.78652e+07	0	0.0003563	2.73812	3	2008.09	-1.91685	89.2195	1
	High	YNFPVEVEVPmER	2	1	1	P78527	M11(Oxidation)	0	6.22472e+07	0	0.000144	2.7369	2	1624.77	-1.44015	84.7779	0
	High	GLSSLLcNFTK	1	2	1	P78527	C7(Carbamidomethyl)	0	3.07561e+07	0	0.003457	2.73099	2	1239.64	-4.07851	86.837	0
	High	DQNILLGTTYR	1	1	1	P78527		0	1.93014e+08	0	0.0007823	2.7019	2	1293.68	-3.05521	69.1806	0
	High	mYAALGDPK	1	1	1	P78527	M1(Oxidation)	0	6.26254e+07	0	0.0001713	2.68392	2	981.468	-2.66429	31.5295	0
	High	HSSLITPLQAVAQRDPIIAK	1	1	1	P78527		0	0	0	0.0001903	2.66285	4	2158.23	-1.96367	76.0929	1
	High	LYSLALHPNAFKR	2	2	1	P78527		0	3.92584e+07	0	0.0001394	2.63881	2	1529.85	-2.83921	52.2438	1
	High	SLGPPQGEEDSVPR	1	1	1	P78527		0	2.74708e+08	0	0.0001739	2.60803	2	1467.7	-2.69298	46.7549	0
	High	NcISTVVHQGLIR	2	2	1	P78527	C2(Carbamidomethyl)	0	4.65865e+07	0	0.0001394	2.51212	2	1496.8	-1.82546	54.8273	0
	High	LQYFmEQFYGIIR	1	2	1	P78527	M5(Oxidation)	0	0	0	0.0001394	2.47933	2	1723.85	-0.73853	98.5996	0
	High	DLLLNTmSQEEK	1	1	1	P78527	M7(Oxidation)	0	1.4149e+08	0	0.0003417	2.43781	2	1436.69	-2.14721	55.7689	0
	High	LGLPGDEVDNKVK	1	1	1	P78527		0	8.01742e+07	0	0.0001394	2.2816	2	1383.75	-1.71296	46.5517	1
	High	LAGANPAVITcDELLLGHEK	1	1	1	P78527	C11(Carbamidomethyl)	0	1.71767e+08	0	0.0001394	2.2176	3	2121.1	-1.86521	81.801	0
	High	QITQSALLAEAR	2	1	1	P78527		0	1.59388e+08	0	0.003196	2.167	3	1300.72	-1.34718	56.4039	0
	High	LGNPIVPLNIR	1	1	1	P78527		0	1.39375e+08	0	0.001506	2.16198	2	1205.73	-1.64765	79.4865	0
	High	IIANALSSEPAcLAEIEEDK	1	1	1	P78527	C12(Carbamidomethyl)	0	1.25367e+07	0	0.000323	2.14414	3	2173.06	-3.0777	91.2299	0
	High	IWSEPFYQETYLPYmIR	1	1	1	P78527	M15(Oxidation)	0	2.4546e+07	0	0.002261	2.08713	2	2252.06	-3.80603	100.275	0
	High	SIGEYDVLR	1	1	1	P78527		0	1.86113e+08	0	0.002726	1.75436	2	1051.54	-2.41271	58.1739	0
	High	mSPYKDILETHLR	3	1	1	P78527	M1(Oxidation)	0	2.44085e+08	0	0.0002943	1.28247	4	1618.82	-1.80354	51.699	1
	High	LLEEALLR	1	1	1	P78527		0	208838928	0.001	0.007069	2.59826	2	956.575	-2.23222	68.4364	0
	High	HSPEDPEKYScFALFVK	1	2	1	P78527	C11(Carbamidomethyl)	0	3.96762e+07	0.001	0.005669	2.41617	3	2053.96	-2.29791	70.9555	1
	High	HGDLPDIQIK	1	1	1	P78527		0	1.9452e+08	0.001	0.007069	2.30728	2	1135.61	-2.58688	49.9619	0
	High	FYGELALKK	1	3	1	P78527		0	2.31939e+07	0.001	0.006302	2.19818	3	1068.61	-2.191	43.9254	1
	High	mAVLALLAK	1	1	1	P78527	M1(Oxidation)	0	2.0644e+07	0.001	0.007069	2.06216	2	945.578	-2.80681	68.7906	0
	High	SKDFVQVmR	1	1	1	P78527	M8(Oxidation)	0	3.01378e+07	0.001	0.007069	1.95304	2	1125.57	-2.79767	26.9695	1
	High	VcLDIIYK	1	1	1	P78527	C2(Carbamidomethyl)	0	1.27339e+07	0.001	0.00483	1.87152	2	1023.55	-2.38172	69.0834	0
	High	ILDVmYSR	1	1	1	P78527	M5(Oxidation)	0	1.30391e+08	0.001	0.004787	1.81939	2	1012.51	-2.29572	47.0118	0
	High	VLEQLIVAHFPmQSR	1	1	1	P78527	M12(Oxidation)	0	20228477	0.001	0.007069	1.72469	3	1783.95	-2.77666	80.3298	0
	High	NELEIPGQYDGR	1	1	1	P78527		0	284920465	0.002	0.007069	3.02916	2	1390.66	-2.24893	59.9517	0
	High	HDVGAYmLmYK	1	1	1	P78527	M7(Oxidation); M9(Oxidation)	0	2.13204e+07	0.002	0.007069	2.50254	2	1359.6	-1.97227	40.3372	0
	High	VPADLLKR	1	1	1	P78527		0	94643824	0.002	0.007069	2.37458	2	911.565	-2.56953	33.456	1
	High	IIANALSSEPAcLAEIEEDKAR	1	1	1	P78527	C12(Carbamidomethyl)	0	1.47784e+08	0.002	0.007069	2.36541	3	2400.2	-1.76735	81.0264	1
	High	GIFTSEIGTK	2	1	1	P78527		0	2.23848e+08	0.002	0.007069	2.3359	2	1052.56	-2.20147	54.577	0
	High	QGNLSSQVPLKR	1	1	1	P78527		0	7.81623e+07	0.002	0.007069	2.32797	3	1326.74	-3.2484	32.2498	1
	High	DcLSIPYR	1	1	1	P78527	C2(Carbamidomethyl)	0	1.04251e+07	0.002	0.01116	2.31515	2	1023.49	-2.36569	60.4474	0
	High	LLNFLmK	1	1	1	P78527	M6(Oxidation)	0	4.42329e+07	0.002	0.01465	2.27028	2	894.509	-2.81986	67.3499	0
	High	YFEGVSPK	1	2	1	P78527		0	8.33075e+07	0.002	0.007069	2.15816	2	926.459	-2.90057	38.2574	0
	High	AAYLSDPR	1	1	1	P78527		0	1.66007e+08	0.002	0.01171	2.10423	2	892.45	-2.62483	31.4247	0
	High	LLSITVR	1	2	1	P78527		0	9.24942e+06	0.002	0.0104	2.02632	2	801.517	-2.31895	53.2503	0
	High	ATQmPEGGQGAPPmYQLYK	2	2	1	P78527	M4(Oxidation); M14(Oxidation)	0	4.93594e+07	0.002	0.009415	2.01512	2	2098.95	-1.86501	52.7477	0
	High	LLNTWTNRYPDAK	2	1	1	P78527		0	168194045	0.002	0.009617	2.01296	2	1591.82	-2.51166	50.1583	1
	High	DYVDLFR	1	2	1	P78527		0	2.5166e+07	0.002	0.007069	2.00298	2	927.455	-2.05351	81.129	0
	High	SLNSIEFR	1	2	1	P78527		0	2.15227e+07	0.002	0.01165	1.99737	2	965.502	-2.77921	49.626	0
	High	LQETLSAADR	1	2	1	P78527		0	1.47046e+08	0.002	0.007232	1.97149	2	1103.56	-5.01563	34.1948	0
	High	LPVLAGcLK	1	2	1	P78527	C7(Carbamidomethyl)	0	7.81733e+07	0.002	0.007069	1.9643	2	970.574	-1.97963	61.4617	0
	High	FYQGFLFSEKPEK	1	1	1	P78527		0	2.30684e+07	0.002	0.007069	1.89841	3	1619.81	-3.06592	67.7753	0
	High	AIRPQIDLK	1	2	1	P78527		0	6.62031e+07	0.002	0.007524	1.77655	3	1053.64	-3.11541	38.3369	0
	High	VAAcELLHSmVmFmLGK	1	2	1	P78527	C4(Carbamidomethyl); M10(Oxidation); M12(Oxidation); M14(Oxidation)	0	1.78611e+07	0.002	0.007069	1.71689	3	1984.93	-1.71933	79.8357	0
	High	WPVAGQIR	1	1	1	P78527		0	4.93476e+07	0.002	0.01345	1.5974	2	926.518	-2.67153	49.7692	0
	High	LLQIIER	1	1	1	P78527		0	9.12844e+07	0.002	0.009635	1.5867	2	884.554	-2.59628	57.0446	0
	High	AALSALESFLK	1	2	1	P78527		0	1.40813e+08	0.002	0.008145	1.46581	2	1149.65	0.384262	97.7161	0
	High	LATTILQHWK	1	1	1	P78527		0	3.33545e+07	0.002	0.007069	1.41417	3	1210.69	-2.47211	54.8059	0
	High	LVINTEEVFRPYAK	1	1	1	P78527		0	1.20502e+08	0.002	0.007465	1.13848	3	1678.91	-2.17906	74.1169	0
	High	HLLSSDQmmDSILADEAFFSVNSSSESLNHLLYDEFVK	1	2	1	P78527	M8(Oxidation); M9(Oxidation)	0	6.02954e+06	0.003	0.01871	3.06332	4	4351	-2.44343	101.793	0
	High	SPNLWLK	1	1	1	P78527		0	5.04216e+07	0.003	0.024	2.00927	2	857.486	-2.32282	52.4146	0
	High	IKYFEGVSPK	1	2	1	P78527		0	25994077	0.003	0.02611	1.99857	2	1167.64	-2.47872	41.2091	1
	High	YAVPSAGLR	1	2	1	P78527		0	1.58404e+08	0.003	0.01888	1.97563	2	933.513	-2.52303	45.4768	0
	High	SYVAWDR	1	2	1	P78527		0	2.55025e+07	0.003	0.01585	1.55407	2	896.424	-2.50504	41.4778	0
	High	FYGELALK	1	3	1	P78527		0	5.55447e+07	0.003	0.02479	1.26275	2	940.512	-2.11893	61.073	0
	High	DILETHLR	1	1	1	P78527		0	1.62782e+07	0.003	0.02021	1.19087	2	996.544	-3.02366	45.2062	0
	High	INQVFHGScITEGNELTK	1	1	1	P78527	C9(Carbamidomethyl)	0	74316845	0.004	0.03497	1.8912	3	2046.99	-2.99546	54.7918	0
	High	GKPLPEYHVR	1	1	1	P78527		0	1.91961e+08	0.004	0.03863	1.26473	3	1195.66	-1.83227	25.2437	0
	High	IAGFDER	1	1	1	P78527		0	1.33658e+08	0.005	0.05124	2.12702	2	807.398	-1.59687	34.8528	0
	High	LSLmYAR	1	1	1	P78527	M4(Oxidation)	0	1.02793e+08	0.005	0.04495	1.43859	2	869.454	-1.59463	41.4602	0
	High	LPPDVLR	1	1	1	P78527		0	1.20572e+08	0.005	0.04634	1.29437	2	809.487	-0.964912	45.7503	0
	High	mSGKHDVGAYmLmYK	1	1	1	P78527	M1(Oxidation); M11(Oxidation); M13(Oxidation)	0	3.52964e+06	0.006	0.05963	2.4033	2	1778.78	-3.86726	31.0875	1
	High	EIFNFVLK	1	2	1	P78527		0	2.03308e+08	0.006	0.07195	2.20012	2	1009.57	-2.27496	88.9557	0
	High	VIAGLYQR	1	1	1	P78527		0	1.52796e+08	0.007	0.08203	2.33601	2	919.534	-2.40476	40.6095	0
	High	ATQmPEGGQGAPPmYQLYKR	1	2	1	P78527	M4(Oxidation); M14(Oxidation)	0	0	0.008	0.09261	1.92369	3	2255.06	-1.22085	43.4869	1
P13010	X-ray repair cross-complementing protein 5 OS=Homo sapiens OX=9606 GN=XRCC5 PE=1 SV=3 - [XRCC5_HUMAN]	349.399	69.67	9	54	54	126	4.16691e+09	732	82.6523	5.80811
	A2	Sequence	# PSMs	# Proteins	# Protein Groups	Protein Group Accessions	Modifications	ΔCn	Area	q-Value	PEP	XCorr	Charge	MH+ [Da]	ΔM [ppm]	RT [min]	# Missed Cleavages
	High	DDEAAAVALSSLIHALDDLDmVAIVR	1	2	1	P13010	M21(Oxidation)	0	1.07089e+08	0	2.428e-09	5.89508	4	2739.38	-2.31377	106.27	0
	High	QVFAENKDEIALVLFGTDGTDNPLSGGDQYQNITVHR	9	3	1	P13010		0	357764549	0	8.487e-05	5.49476	4	4061.98	-1.33996	100.054	1
	High	KKDQVTAQEIFQDNHEDGPTAK	7	1	1	P13010		0	3.7155e+09	0	1.226e-06	5.05723	4	2499.21	-1.97416	38.9277	2
	High	DKPSGDTAAVFEEGGDVDDLLDmI	3	2	1	P13010	M23(Oxidation)	0	8.89455e+08	0	2.441e-05	4.64135	2	2525.12	-1.21706	102.443	0
	High	RHIEIFTDLSSR	1	3	1	P13010		0	1.66955e+08	0	9.246e-06	4.61361	3	1473.78	-2.72882	49.0409	1
	High	RANPQVGVAFPHIK	2	2	1	P13010		0	81745793	0	1.143e-06	4.59943	3	1533.86	-2.48599	45.8655	1
	High	HLmLPDFDLLEDIESK	2	3	1	P13010	M3(Oxidation)	0	1.02096e+09	0	2.137e-06	4.2512	2	1930.94	-1.92421	100.767	0
	High	KcDISLQFFLPFSLGK	2	1	1	P13010	C2(Carbamidomethyl)	0	2.05334e+07	0	1.013e-05	4.00029	2	1900	-1.33526	101.264	1
	High	LKTEQGGAHFSVSSLAEGSVTSVGSVNPAENFR	4	2	1	P13010		0	4.31763e+08	0	0.0001394	3.95073	4	3362.66	-1.67455	84.1933	1
	High	LGGHGPSFPLKGITEQQKEGLEIVK	1	2	1	P13010		0	3.4373e+07	0	0.0001394	3.92006	3	2662.45	-2.8262	67.8053	2
	High	KDEKTDTLEDLFPTTK	3	2	1	P13010		0	2856428365	0	0.0001394	3.84828	3	1880.95	-1.4414	65.5731	2
	High	LGGHGPSFPLK	5	2	1	P13010		0	1.89224e+09	0	0.0001394	3.7287	3	1109.61	-2.74819	40.3657	0
	High	YAPTEAQLNAVDALIDSmSLAKK	1	1	1	P13010	M18(Oxidation)	0	1.37857e+07	0	0.0001394	3.72112	2	2465.25	-2.57946	96.1442	1
	High	LGGHGPSFPLKGITEQQK	2	2	1	P13010		0	6.98943e+07	0	0.0001394	3.68773	2	1894.01	-2.37159	49.3034	1
	High	SQLDIIIHSLKK	4	2	1	P13010		0	9.66596e+08	0	0.0001394	3.63431	2	1394.83	-2.7387	66.6576	1
	High	HNYEcLVYVQLPFmEDLR	2	2	1	P13010	C5(Carbamidomethyl); M14(Oxidation)	0	1.41398e+08	0	0.0001394	3.58158	2	2342.09	-0.812694	99.3959	0
	High	TEQGGAHFSVSSLAEGSVTSVGSVNPAENFR	8	2	1	P13010		0	8.56838e+08	0	0.0001394	3.53869	3	3121.47	-2.88696	91.2749	0
	High	QLNHFWEIVVQDGITLITK	1	2	1	P13010		0	6.64501e+07	0	0.0007519	3.52369	3	2254.21	-4.06302	102.558	0
	High	GITEQQKEGLEIVK	2	2	1	P13010		0	5.67359e+08	0	0.001237	3.50208	2	1571.86	-2.75124	45.4752	1
	High	YAPTEAQLNAVDALIDSmSLAK	3	2	1	P13010	M18(Oxidation)	0	7.16361e+08	0	6.468e-05	3.4752	3	2337.16	-2.17847	100.276	0
	High	DDEAAAVALSSLIHALDDLDMVAIVR	1	2	1	P13010		0	1.80394e+06	0	0.000211	3.45144	3	2723.39	-2.06049	106.704	0
	High	EPLPPIQQHIWNmLNPPAEVTTK	5	2	1	P13010	M13(Oxidation)	0	5.9288e+09	0	0.0001394	3.41844	3	2669.37	-2.10387	92.285	0
	High	AFREEAIKFSEEQR	1	2	1	P13010		0	4.95756e+07	0	0.0001512	3.30208	2	1739.87	-1.51358	43.034	2
	High	ETVYcLNDDDETEVLKEDIIQGFR	1	2	1	P13010	C5(Carbamidomethyl)	0	3.84195e+08	0	0.0001394	3.27654	3	2901.34	-2.63095	100.079	1
	High	TDTLEDLFPTTK	2	2	1	P13010		0	1.28427e+09	0	0.0001394	3.24419	2	1380.69	-2.37458	87.5371	0
	High	ANPQVGVAFPHIK	4	2	1	P13010		0	1.67629e+09	0	0.0001394	3.21222	2	1377.76	-2.37026	56.9348	0
	High	KLKTEQGGAHFSVSSLAEGSVTSVGSVNPAENFR	1	2	1	P13010		0	0	0	0.001509	3.06952	4	3490.75	-2.87181	76.7511	2
	High	YGSDIVPFSKVDEEQmK	3	2	1	P13010	M16(Oxidation)	0	5.55458e+08	0	0.0001394	2.99592	2	1987.92	-4.18366	61.7255	1
	High	IKTLFPLIEAK	3	2	1	P13010		0	711386448	0	0.0001466	2.96075	3	1272.79	-2.52905	74.0556	1
	High	VFAARDDEAAAVALSSLIHALDDLDmVAIVR	1	2	1	P13010	M26(Oxidation)	0	8.55245e+06	0	0.0002264	2.95489	4	3283.7	-1.24408	104.024	1
	High	HIEIFTDLSSR	4	3	1	P13010		0	1730272050	0	0.0001394	2.76837	2	1317.68	-2.54395	63.3558	0
	High	ETVYcLNDDDETEVLK	1	2	1	P13010	C5(Carbamidomethyl)	0	9.19081e+06	0	0.0001394	2.63418	2	1942.86	-0.573257	74.7353	0
	High	YGSDIVPFSK	1	2	1	P13010		0	2.81155e+09	0	0.0001951	2.62851	2	1112.56	-2.51264	61.9303	0
	High	VITmFVQR	2	4	1	P13010	M4(Oxidation)	0	1.36978e+09	0	0.002873	2.61984	2	1009.55	-1.98713	44.1304	0
	High	LTIGSNLSIR	2	2	1	P13010		0	1.07082e+09	0	0.0001394	2.39622	2	1073.63	-2.14728	64.1798	0
	High	KVITMFVQR	2	4	1	P13010		0	2.88939e+07	0	0.002814	2.05388	2	1121.65	-1.58726	43.5403	1
	High	ALQEKVEIK	1	2	1	P13010		0	4.30809e+07	0	0.0007608	2.01683	3	1057.62	-2.70624	28.1049	1
	High	TLFPLIEAK	2	2	1	P13010		0	2.85156e+09	0	0.0001793	1.45012	2	1031.61	-2.16707	83.7274	0
	High	YGSDIVPFSKVDEEQmKYK	1	2	1	P13010	M16(Oxidation)	0	4.68698e+07	0.001	0.007059	2.81462	3	2279.08	-2.64876	58.6835	2
	High	ALHPREPLPPIQQHIWNmLNPPAEVTTK	1	2	1	P13010	M18(Oxidation)	0	7.29238e+07	0.001	0.006296	2.68846	4	3243.71	-0.852856	76.9222	1
	High	KVITmFVQR	4	4	1	P13010	M5(Oxidation)	0	2.94794e+08	0.001	0.007069	2.58268	2	1137.64	-3.10404	33.5939	1
	High	FFmGNQVLK	2	2	1	P13010	M3(Oxidation)	0	6.95581e+08	0.001	0.007069	2.1372	2	1099.56	-2.83355	51.9048	0
	High	EDIIQGFR	1	2	1	P13010		0	54340634	0.001	0.007069	2.09858	2	977.502	-2.81776	59.3808	0
	High	EEAIKFSEEQR	1	2	1	P13010		0	5.25481e+07	0.001	0.007069	2.01159	2	1365.66	-3.09402	32.8148	1
	High	KYAPTEAQLNAVDALIDSmSLAK	1	2	1	P13010	M19(Oxidation)	0	0	0.001	0.004118	1.96705	2	2465.25	-2.08429	94.1011	1
	High	DQVTAQEIFQDNHEDGPTAK	1	2	1	P13010		0	7.84006e+08	0.002	0.007069	2.55069	3	2243.02	-1.43236	61.2485	0
	High	SQLDIIIHSLK	1	2	1	P13010		0	2.12647e+08	0.002	0.007069	2.2299	2	1266.74	-3.20893	78.7589	0
	High	IQPGSQQADFLDALIVSMDVIQHETIGK	1	3	1	P13010		0	9.65558e+07	0.002	0.008279	1.3092	3	3053.56	-1.23495	103.857	0
	High	RFFmGNQVLK	1	2	1	P13010	M4(Oxidation)	0	104000026	0.003	0.02199	2.51412	3	1255.66	-2.33403	40.4455	1
	High	AFREEAIK	2	2	1	P13010		0	5.79514e+08	0.003	0.02515	2.32151	2	963.524	-1.57932	24.428	1
	High	DQVTAQEIFQDNHEDGPTAKK	1	2	1	P13010		0	2.83121e+07	0.003	0.02157	2.21521	3	2371.11	-2.15266	50.3531	1
	High	TWTVVDAK	1	2	1	P13010		0	1179125060	0.003	0.01567	2.03958	2	919.486	-2.07018	43.1223	0
	High	LFQcLLHR	2	2	1	P13010	C4(Carbamidomethyl)	0	7.83806e+08	0.003	0.01723	1.75645	3	1086.59	-1.8478	52.3941	0
	High	IQPGSQQADFLDALIVSmDVIQHETIGK	1	3	1	P13010	M18(Oxidation)	0	1099546884	0.003	0.01687	1.60764	3	3069.55	-0.605894	101.951	0
	High	FNNFLK	1	6	1	P13010		0	1337681823	0.004	0.04109	1.84609	2	782.418	-1.45409	43.1056	0
	High	HSIHWPcR	1	2	1	P13010	C7(Carbamidomethyl)	0	4.85545e+08	0.006	0.07203	2.03536	3	1092.51	-1.78468	25.2564	0
	High	VITMFVQR	1	4	1	P13010		0	4.4286e+07	0.006	0.05784	2.00983	2	993.553	-2.52978	57.8195	0
	High	cDISLQFFLPFSLGK	1	1	1	P13010	C1(Carbamidomethyl)	0	1.59643e+06	0.009	0.103	2.33338	2	1771.91	-0.53659	107.027	0
K7EIU8	Mothers against decapentaplegic homolog OS=Homo sapiens OX=9606 GN=SMAD4 PE=1 SV=1 - [K7EIU8_HUMAN]	319.108	52.85	13	25	25	116	1.21633e+10	456	50.0209	6.78564
	A2	Sequence	# PSMs	# Proteins	# Protein Groups	Protein Group Accessions	Modifications	ΔCn	Area	q-Value	PEP	XCorr	Charge	MH+ [Da]	ΔM [ppm]	RT [min]	# Missed Cleavages
	High	KDELDSLITAITTNGAHPSK	6	10	1	K7EIU8		0	5926609024	0	7.103e-07	4.96419	3	2111.09	-2.59528	88.1247	1
	High	cLSDHAVFVQSYYLDR	17	5	1	K7EIU8	C1(Carbamidomethyl)	0	3.84515e+09	0	2.028e-06	4.7924	3	1972.92	-2.3258	75.4016	0
	High	DEYVHDFEGQPSLSTEGHSIQTIQHPPSNR	9	5	1	K7EIU8		0	9.49347e+09	0	5.427e-07	4.7242	4	3405.57	-2.22836	64.3902	0
	High	EKKDELDSLITAITTNGAHPSK	6	10	1	K7EIU8		0	2.47327e+09	0	8.481e-08	4.55233	2	2368.23	-1.40441	77.6163	2
	High	VPSScPIVTVDGYVDPSGGDRFcLGQLSNVHR	3	5	1	K7EIU8	C5(Carbamidomethyl); C23(Carbamidomethyl)	0	6.39596e+08	0	4.659e-06	4.4325	4	3488.66	-2.19794	93.9897	1
	High	cDSVcVNPYHYER	6	7	1	K7EIU8	C1(Carbamidomethyl); C5(Carbamidomethyl)	0	2.17261e+09	0	0.0001394	4.29209	3	1698.7	-1.48199	44.1887	0
	High	DELDSLITAITTNGAHPSK	2	10	1	K7EIU8		0	1.16481e+08	0	1.387e-07	4.19428	2	1983	-1.67923	100.296	0
	High	VPSScPIVTVDGYVDPSGGDR	2	6	1	K7EIU8	C5(Carbamidomethyl)	0	1.19452e+08	0	0.0001394	4.0788	3	2177.01	-2.62887	82.0445	0
	High	VVSPGIDLSGLTLQSNAPSSmmVK	6	5	1	K7EIU8	M21(Oxidation); M22(Oxidation)	0	4911182272	0	3.391e-05	3.95968	3	2463.24	-0.928114	94.4203	0
	High	GVQLEcKGEGDVWVR	11	5	1	K7EIU8	C6(Carbamidomethyl)	0	7.20042e+08	0	0.0001394	3.92902	3	1731.84	-2.36907	54.0932	1
	High	cLSDHAVFVQSYYLDREAGR	2	5	1	K7EIU8	C1(Carbamidomethyl)	0	7.90148e+07	0	0.0001394	3.85173	4	2386.12	-3.73578	68.2591	1
	High	KGFPHVIYAR	9	9	1	K7EIU8		0	1.29664e+10	0	0.0001394	3.59463	3	1187.67	-2.59621	32.3124	1
	High	QSIKETPcWIEIHLHR	6	2	1	K7EIU8	C8(Carbamidomethyl)	0	1.78623e+09	0	0.0001394	3.26333	2	2047.05	-2.51359	57.869	1
	High	WPDLHKNELK	3	9	1	K7EIU8		0	2.13535e+09	0	0.003152	3.01643	2	1279.68	-2.88708	37.938	1
	High	LWRWPDLHKNELK	2	9	1	K7EIU8		0	68860400	0	0.0002638	2.99033	4	1734.94	-2.41699	55.8813	2
	High	FcLGQLSNVHR	4	5	1	K7EIU8	C2(Carbamidomethyl)	0	1.80303e+09	0	0.0001394	2.91944	3	1330.67	-2.47207	54.7083	0
	High	ETPcWIEIHLHR	6	2	1	K7EIU8	C4(Carbamidomethyl)	0	6.11008e+09	0	0.0001415	2.90542	2	1590.78	-2.46926	61.6605	0
	High	YcQYAFDLK	4	8	1	K7EIU8	C2(Carbamidomethyl)	0	5.38881e+09	0	0.0003842	2.77698	2	1207.54	-1.84586	60.9796	0
	High	APGDAVHKIYPSAYIK	2	6	1	K7EIU8		0	1.25717e+08	0	0.0001704	2.4504	3	1729.92	-2.80005	53.2358	1
	High	RAIESLVK	2	10	1	K7EIU8		0	2.99679e+09	0.001	0.007069	1.73589	2	915.56	-2.86534	27.5031	1
	High	GWGPDYPR	3	2	1	K7EIU8		0	1.00614e+10	0.002	0.0119	1.60476	2	947.435	-2.54729	45.4229	0
	High	GFPHVIYAR	2	9	1	K7EIU8		0	0	0.002	0.007771	1.23056	2	1059.57	-2.2356	44.6679	0
	High	IYPSAYIK	1	6	1	K7EIU8		0	1.34621e+10	0.002	0.007069	0.624753	2	954.527	-2.73249	47.1242	0
	High	cLSDHAVFVQSYYLDREAGRAPGDAVHK	1	5	1	K7EIU8	C1(Carbamidomethyl)	0	2.16965e+07	0.003	0.02323	3.12955	5	3161.52	-1.51889	61.7621	2
	High	mSFVKGWGPDYPR	1	2	1	K7EIU8	M1(Oxidation)	0	1.71463e+07	0.003	0.02163	1.81464	3	1555.73	-3.12899	57.3046	1
V9GYY3	C-1-tetrahydrofolate synthase, cytoplasmic OS=Homo sapiens OX=9606 GN=MTHFD1 PE=1 SV=2 - [V9GYY3_HUMAN]	300.295	29.07	8	24	24	161	6.80932e+07	922	99.6576	7.91357
	A2	Sequence	# PSMs	# Proteins	# Protein Groups	Protein Group Accessions	Modifications	ΔCn	Area	q-Value	PEP	XCorr	Charge	MH+ [Da]	ΔM [ppm]	RT [min]	# Missed Cleavages
	High	IYGADDIELLPEAQHK	3	7	1	V9GYY3		0	2.28989e+07	0	1.353e-06	3.74466	2	1811.91	-2.80377	76.3979	0
	High	GALALAQAVQR	29	8	1	V9GYY3		0	491420	0	0.0001394	3.47772	2	1097.64	-2.00689	13.2203	0
	High	YVVVTGITPTPLGEGK	17	8	1	V9GYY3		0	7.43254e+07	0	0.0001394	3.33318	2	1630.91	-0.0272268	80.0796	0
	High	TDTESELDLISR	26	8	1	V9GYY3		0	57909983	0	0.0001394	3.29246	2	1378.67	-0.772194	0.68601	0
	High	YSGLcPHVVVLVATVR	1	8	1	V9GYY3	C5(Carbamidomethyl)	0	1.65179e+07	0	5.718e-06	3.27265	3	1769.97	-2.33168	78.9478	0
	High	LDIDPETITWQR	7	8	1	V9GYY3		0	6.43705e+07	0	0.0001394	2.90908	2	1486.75	-1.22593	89.1592	0
	High	AAQAPSSFQLLYDLK	5	8	1	V9GYY3		0	299813	0	0.0001394	2.66785	2	1651.86	-2.50961	13.6515	0
	High	LAILQVGNRDDSNLYINVK	1	6	1	V9GYY3		0	5.18959e+07	0	0.0001394	2.62999	3	2145.16	-2.94803	84.8932	1
	High	TDPTTLTDEEINR	15	8	1	V9GYY3		0	6.55836e+07	0	0.0001928	2.48698	2	1504.71	-2.79102	55.44	0
	High	EIGLLSEEVELYGETK	1	8	1	V9GYY3		0	14531600	0	0.0001394	2.4221	2	1808.92	-0.028672	98.7359	0
	High	VVGDVAYDEAKER	1	7	1	V9GYY3		0	0	0	0.0003505	2.39741	2	1450.72	-1.42257	34.54	1
	High	VVGDVAYDEAK	2	7	1	V9GYY3		0	25421921	0	0.0001488	2.36531	2	1165.57	-3.09498	37.76	0
	High	VLLSALER	10	8	1	V9GYY3		0	97814.3	0	0.0002912	2.2693	2	900.55	-1.99233	0.081875	0
	High	mFGIPVVVAVNAFK	1	8	1	V9GYY3	M1(Oxidation)	0	37096216	0	0.001457	1.68953	2	1507.83	-1.66707	100.453	0
	High	STTTIGLVQALGAHLYQNVFAcVR	1	8	1	V9GYY3	C22(Carbamidomethyl)	0	3.21901e+07	0.001	0.00616	2.77274	3	2619.37	-0.961212	101.639	0
	High	GVPTGFILPIR	17	8	1	V9GYY3		0	288546	0.001	0.006348	2.26478	2	1169.7	0.189793	7.32853	0
	High	KVVGDVAYDEAK	1	7	1	V9GYY3		0	12881885	0.001	0.004927	2.05706	2	1293.66	-3.63722	29.2441	1
	High	IFHELTQTDK	3	8	1	V9GYY3		0	18638213	0.001	0.004903	1.98998	2	1231.63	-3.1796	32.64	0
	High	LAILQVGNR	2	6	1	V9GYY3		0	9.19493e+06	0.001	0.007069	1.20027	2	983.598	-2.08265	58.4052	0
	High	FSDIQIR	11	8	1	V9GYY3		0	90986.2	0.002	0.00771	2.00449	2	878.473	-0.499146	8.7073	0
	High	AYIQENLELVEK	2	8	1	V9GYY3		0	89963.5	0.003	0.0263	2.06065	2	1448.76	-2.58448	13.7516	0
	High	RFSDIQIR	1	8	1	V9GYY3		0	1.15183e+07	0.003	0.0225	1.91061	2	1034.57	-4.18481	36.1509	1
	High	LKAAEEIGIK	1	6	1	V9GYY3		0	1.29179e+07	0.003	0.01672	1.03557	2	1071.64	-3.06116	35.7396	1
	High	TPVPSDIDISR	3	8	1	V9GYY3		0	420039	0.004	0.04185	1.68795	2	1199.62	-1.68379	13.8134	0
H6VRF8	Cytokeratin-1 OS=Homo sapiens OX=9606 GN=KRT1 PE=3 SV=1 - [H6VRF8_HUMAN]	229.024	58.85	28	35	39	80	2.46568e+09	644	66.013	8.11865
	A2	Sequence	# PSMs	# Proteins	# Protein Groups	Protein Group Accessions	Modifications	ΔCn	Area	q-Value	PEP	XCorr	Charge	MH+ [Da]	ΔM [ppm]	RT [min]	# Missed Cleavages
	High	THNLEPYFESFINNLR	2	7	1	H6VRF8		0	6.21809e+08	0	1.245e-06	5.28434	3	1993.98	-0.792132	99.2879	0
	High	SKAEAESLYQSKYEELQITAGR	2	7	1	H6VRF8		0	134813446	0	1.428e-06	5.04082	3	2501.25	-0.335652	60.7913	2
	High	GGGGGGYGSGGSSYGSGGGSYGSGGGGGGGR	1	7	1	H6VRF8		0	278074556	0	9.51e-07	4.94441	3	2383.95	-1.11469	30.4041	0
	High	NKLNDLEDALQQAKEDLAR	5	7	1	H6VRF8		0	1086894830	0	8.995e-05	4.54142	3	2184.12	-2.36012	91.9853	2
	High	QISNLQQSISDAEQR	3	7	1	H6VRF8		0	4.02574e+08	0	1.026e-05	4.07565	2	1716.85	-2.09659	57.572	0
	High	GSYGSGGSSYGSGGGSYGSGGGGGGHGSYGSGSSSGGYR	2	6	1	H6VRF8		0	760685188	0	0.0001394	3.96703	3	3312.3	-2.40474	35.4196	0
	High	NKLNDLEDALQQAK	2	7	1	H6VRF8		0	3.14856e+08	0	0.0001394	3.91719	3	1599.83	-2.80875	67.1749	1
	High	SLDLDSIIAEVKAQYEDIAQK	2	6	1	H6VRF8		0	4.62142e+07	0	4.74e-06	3.876	3	2349.21	-2.13995	102.551	1
	High	FLEQQNQVLQTK	4	10	2	P35908;H6VRF8		0	2.92444e+09	0	0.0001394	3.76229	2	1475.78	-2.47834	53.0949	0
	High	KQISNLQQSISDAEQR	1	7	1	H6VRF8		0	9.80339e+06	0	1.968e-06	3.72795	2	1844.95	-0.0318597	43.7898	1
	High	WELLQQVDTSTR	2	7	1	H6VRF8		0	4.08041e+08	0	9.942e-05	3.70782	2	1475.75	-1.98003	77.8356	0
	High	LALDLEIATYR	2	32	2	P05787;H6VRF8		0	246996398	0	8.689e-05	3.70582	2	1277.71	-2.02413	91.5984	0
	High	YEELQITAGR	1	8	1	H6VRF8		0	2.66592e+09	0	0.0001394	3.69387	2	1179.6	-2.65655	50.3728	0
	High	mSGEcAPNVSVSVSTSHTTISGGGSR	1	7	1	H6VRF8	M1(Oxidation); C5(Carbamidomethyl)	0	2.82354e+08	0	0.0001394	3.41804	3	2581.15	-3.27987	50.376	0
	High	SKAEAESLYQSK	2	7	1	H6VRF8		0	845176425	0	0.0001394	3.37648	2	1340.67	-2.58246	24.6403	1
	High	THNLEPYFESFINNLRR	5	7	1	H6VRF8		0	1.14583e+09	0	0.002367	3.36925	4	2150.07	-1.61379	93.1581	1
	High	SGGGFSSGSAGIINYQR	2	7	1	H6VRF8		0	2.00391e+08	0	5.593e-05	3.35341	2	1657.79	-1.94286	58.6853	0
	High	FSScGGGGGSFGAGGGFGSR	2	6	1	H6VRF8	C4(Carbamidomethyl)	0	9.18662e+07	0	5.836e-06	3.34397	2	1765.73	-3.19512	52.8728	0
	High	SLNNQFASFIDK	2	7	1	H6VRF8		0	1.01137e+09	0	0.0001394	3.31671	2	1383.69	-1.94526	77.6344	0
	High	RTNAENEFVTIKK	2	7	1	H6VRF8		0	1.89587e+07	0	0.0001394	3.27177	3	1549.83	-3.15323	28.1538	2
	High	SLDLDSIIAEVK	4	6	1	H6VRF8		0	1240547326	0	0.0001394	3.11912	2	1302.71	-1.82323	100.46	0
	High	LNDLEDALQQAKEDLAR	2	7	1	H6VRF8		0	5.61423e+07	0	7.283e-05	3.05202	2	1941.99	0.192281	94.2507	1
	High	LDSELKNmQDmVEDYR	3	7	1	H6VRF8	M8(Oxidation); M11(Oxidation)	0	3.01161e+08	0	0.003304	2.9635	3	2017.88	-2.31954	46.333	1
	High	AEAESLYQSK	2	7	1	H6VRF8		0	3.97229e+08	0	0.0003195	2.92322	2	1125.54	-2.92595	28.583	0
	High	TNAENEFVTIKK	3	7	1	H6VRF8		0	1.80667e+09	0	0.001553	2.92129	2	1393.73	-2.71943	36.9681	1
	High	LRSEIDNVKK	1	7	1	H6VRF8		0	3.62383e+08	0	0.001235	2.87595	3	1201.69	-2.68839	21.9692	2
	High	AEAESLYQSKYEELQITAGR	1	7	1	H6VRF8		0	3.82351e+07	0	0.0001553	2.80897	3	2286.12	-0.907394	69.2194	1
	High	SLNNQFASFIDKVR	2	7	1	H6VRF8		0	1.60455e+09	0	0.0001394	2.7832	2	1638.86	-1.70731	80.753	1
	High	TNAENEFVTIK	2	7	1	H6VRF8		0	449667323	0	0.0001886	2.77274	2	1265.63	-2.12717	51.2898	0
	High	IEISELNR	2	8	2	P35908;H6VRF8		0	958777098	0	0.001812	2.66899	2	973.529	-2.54241	47.7458	0
	High	QISNLQQSISDAEQRGENALKDAK	2	7	1	H6VRF8		0	80788504	0	0.0001394	2.57903	3	2643.33	-2.55285	79.1458	2
	High	LNDLEDALQQAK	1	7	1	H6VRF8		0	7.43595e+07	0	0.000187	2.55257	2	1357.69	-2.96919	66.6646	0
	High	NmQDmVEDYR	1	7	1	H6VRF8	M2(Oxidation); M5(Oxidation)	0	2.63143e+07	0.001	0.00655	2.13574	2	1332.52	-1.89561	29.4586	0
	High	LLRDYQELmNTK	3	7	1	H6VRF8	M9(Oxidation)	0	9.48776e+07	0.002	0.007069	2.91813	2	1539.78	-2.06081	42.684	1
	High	SLVNLGGSK	2	6	1	H6VRF8		0	1.28533e+09	0.002	0.007069	2.01209	2	874.497	-2.91551	38.1333	0
	High	SISISVAR	1	7	1	H6VRF8		0	6.85526e+08	0.002	0.008682	1.50488	2	832.486	-2.82957	41.2583	0
	High	FLEQQNQVLQTKWELLQQVDTSTR	1	7	1	H6VRF8		0	6.94477e+06	0.003	0.02008	2.58219	4	2932.51	-2.38744	98.05	1
	High	NKYEDEINKR	1	24	4	H6VRF8;P13647;B4DRR0;P05787		0	7.61087e+08	0.004	0.0379	2.44623	3	1308.65	-2.51915	22.724	2
	High	TLLEGEESR	1	7	1	H6VRF8		0	1.39861e+09	0.008	0.0857	2.11129	2	1033.51	-2.28524	32.0622	0
Q9Y3I0	RNA-splicing ligase RtcB homolog OS=Homo sapiens OX=9606 GN=RTCB PE=1 SV=1 - [RTCB_HUMAN]	227.741	61.39	4	33	33	85	4.35867e+09	505	55.1749	7.2251
	A2	Sequence	# PSMs	# Proteins	# Protein Groups	Protein Group Accessions	Modifications	ΔCn	Area	q-Value	PEP	XCorr	Charge	MH+ [Da]	ΔM [ppm]	RT [min]	# Missed Cleavages
	High	NLDFQDVLDKLADmGIAIR	3	1	1	Q9Y3I0	M14(Oxidation)	0	1.34854e+09	0	8.941e-08	5.09703	3	2163.11	-1.1337	101.914	1
	High	DLEEALEmGVDWSLR	15	2	1	Q9Y3I0	M8(Oxidation)	0	578805330	0	1.079e-07	4.23478	3	1778.82	-2.51211	102.038	0
	High	EGYAWAEDKEHcEEYGR	3	2	1	Q9Y3I0	C12(Carbamidomethyl)	0	1.00303e+09	0	0.0001394	3.96853	3	2128.86	-1.99471	40.0691	1
	High	GLGHQVATDALVAMEK	1	2	1	Q9Y3I0		0	2.53089e+07	0	5.002e-05	3.8987	3	1639.84	-3.00697	64.6915	0
	High	GFVPNmQVEGVFYVNDALEK	2	4	1	Q9Y3I0	M6(Oxidation)	0	483503025	0	2.123e-07	3.88997	2	2272.09	-1.63366	98.9239	0
	High	VFNTTPDDLDLHVIYDVSHNIAK	3	2	1	Q9Y3I0		0	2.45238e+09	0	1.732e-05	3.87614	2	2626.31	-0.133486	99.0654	0
	High	LVmEEAPESYKNVTDVVNTcHDAGISK	3	1	1	Q9Y3I0	M3(Oxidation); C20(Carbamidomethyl)	0	7.01627e+08	0	0.0001394	3.85874	3	3022.4	-2.96725	65.8641	1
	High	GLPQLGTLGAGNHYAEIQVVDEIFNEYAAK	3	1	1	Q9Y3I0		0	1.3636e+09	0	7.399e-05	3.80536	4	3217.61	-1.80656	101.522	0
	High	IASPEGQDYLKGmAAAGNYAWVNR	2	2	1	Q9Y3I0	M13(Oxidation)	0	1.04507e+09	0	7.58e-05	3.79405	3	2598.23	-2.36125	72.8204	1
	High	RNLDFQDVLDKLADmGIAIR	1	1	1	Q9Y3I0	M15(Oxidation)	0	1.97259e+08	0	0.0001394	3.78756	3	2319.21	-1.07714	100.368	2
	High	NVTDVVNTcHDAGISK	1	1	1	Q9Y3I0	C9(Carbamidomethyl)	0	1.71447e+08	0	0.0001394	3.76598	2	1729.81	-2.83135	45.1423	0
	High	NVTDVVNTcHDAGISKK	2	1	1	Q9Y3I0	C9(Carbamidomethyl)	0	1.36221e+08	0	2.396e-05	3.73671	2	1857.91	-3.02998	35.7848	1
	High	NLDFQDVLDKLADMGIAIR	1	1	1	Q9Y3I0		0	9.23822e+06	0	0.0001394	3.67041	2	2147.11	-2.79352	103.48	1
	High	GmAAAGNYAWVNR	1	2	1	Q9Y3I0	M2(Oxidation)	0	1.46848e+09	0	0.0001394	3.63083	2	1396.64	-2.16252	45.8779	0
	High	GLGHQVATDALVAmEK	4	2	1	Q9Y3I0	M14(Oxidation)	0	3.42751e+09	0	0.0001394	3.62401	2	1655.84	-3.84294	47.6896	0
	High	RNLDFQDVLDKLADMGIAIR	1	1	1	Q9Y3I0		0	5.34834e+06	0	0.0001007	3.6203	4	2303.21	-1.73474	101.797	2
	High	TNLDESDVQPVKEQLAQAmFDHIPVGVGSK	3	3	1	Q9Y3I0	M19(Oxidation)	0	4.97959e+09	0	0.000684	3.58979	3	3268.61	-1.65015	86.5899	1
	High	LVmEEAPESYKNVTDVVNTcHDAGISKK	2	1	1	Q9Y3I0	M3(Oxidation); C20(Carbamidomethyl)	0	6.53439e+08	0	0.0001432	3.54551	5	3150.5	-2.54495	58.398	2
	High	TNLDESDVQPVK	1	3	1	Q9Y3I0		0	1.9209e+08	0	0.0001394	3.47424	2	1344.66	-2.88949	42.0998	0
	High	RGLPQLGTLGAGNHYAEIQVVDEIFNEYAAK	1	1	1	Q9Y3I0		0	1.06884e+08	0	0.0001505	3.4238	4	3373.71	-1.15762	100.324	1
	High	SYNDELQFLEK	1	4	1	Q9Y3I0		0	3200439515	0	0.0001394	3.41926	2	1385.65	-2.47282	77.1253	0
	High	EQLAQAmFDHIPVGVGSK	1	3	1	Q9Y3I0	M7(Oxidation)	0	3.38092e+07	0	3.555e-05	3.41337	2	1942.96	-3.48764	69.2835	0
	High	QIGNVAALPGIVHR	6	3	1	Q9Y3I0		0	3.6933e+09	0	0.0001394	3.0621	2	1444.84	-2.16538	64.0468	0
	High	GQVcVmIHSGSR	1	2	1	Q9Y3I0	C4(Carbamidomethyl); M6(Oxidation)	0	2.5542e+08	0	0.0001394	3.02526	2	1346.63	-2.90939	25.8788	0
	High	RNLDFQDVLDK	1	2	1	Q9Y3I0		0	7.19233e+07	0	0.0001394	2.98675	3	1362.7	-2.89206	62.7206	1
	High	NLDFQDVLDK	2	2	1	Q9Y3I0		0	7.73156e+08	0	0.0001565	2.89912	2	1206.6	-1.92722	82.1188	0
	High	GGGVGGFLPAmK	3	4	1	Q9Y3I0	M11(Oxidation)	0	2074162006	0	0.0003113	2.85896	2	1106.56	-1.91558	53.7038	0
	High	IASPEGQDYLK	2	2	1	Q9Y3I0		0	4.40312e+09	0	0.0001394	2.66615	2	1220.61	-1.91738	46.5034	0
	High	LVmEEAPESYK	2	1	1	Q9Y3I0	M3(Oxidation)	0	1401227323	0	0.0001406	2.65346	2	1311.61	-2.28035	36.9922	0
	High	LADmGIAIR	1	1	1	Q9Y3I0	M4(Oxidation)	0	4.42673e+08	0	0.002257	2.46676	2	975.527	-1.90149	44.7025	0
	High	LRPIAVIK	1	1	1	Q9Y3I0		0	1.45335e+08	0	0.000693	2.41454	3	909.623	-2.00966	36.4345	0
	High	mLQADPNKVSAR	1	2	1	Q9Y3I0	M1(Oxidation)	0	557010104	0	0.002919	1.90812	3	1345.69	-2.60918	26.1935	1
	High	LRPIAVIKG	2	1	1	Q9Y3I0		0	9.44989e+08	0.001	0.007069	2.35093	3	966.643	-2.60237	37.7398	1
	High	GGGVGGFLPAMK	1	4	1	Q9Y3I0		0	7.7665e+06	0.002	0.008129	2.1054	2	1090.57	-2.24101	70.137	0
	High	SSmTFLTR	2	2	1	Q9Y3I0	M3(Oxidation)	0	1.57715e+09	0.002	0.007069	2.03889	2	958.464	-2.72901	33.6209	0
	High	LmFEELR	3	4	1	Q9Y3I0	M2(Oxidation)	0	2.32546e+08	0.002	0.01349	1.98148	2	953.474	-2.12763	54.635	0
	High	MLQADPNKVSAR	1	2	1	Q9Y3I0		0	1.31944e+07	0.002	0.01449	1.9412	2	1329.69	-2.5989	30.0242	1
	High	GLPQLGTLGAGNHYAEIQVVDEIFNEYAAKK	1	1	1	Q9Y3I0		0	3.81417e+08	0.002	0.01111	1.02871	4	3345.7	-2.53987	100.505	1
A0A125QYY8	IBM-B1 light chain variable region (Fragment) OS=Homo sapiens OX=9606 PE=2 SV=1 - [A0A125QYY8_HUMAN]	203.869	11.61	1	1	1	73	40570475638	112	12.1591	8.49951
	A2	Sequence	# PSMs	# Proteins	# Protein Groups	Protein Group Accessions	Modifications	ΔCn	Area	q-Value	PEP	XCorr	Charge	MH+ [Da]	ΔM [ppm]	RT [min]	# Missed Cleavages
	High	FSGSGSGTAFTLR	73	1	1	A0A125QYY8		0	40570475638	0	0.0001394	3.75717	2	1287.63	-2.07882	52.8965	0
A0A0D9SFB3	RNA helicase OS=Homo sapiens OX=9606 GN=DDX3X PE=1 SV=1 - [A0A0D9SFB3_HUMAN]	196.38	60.62	37	39	40	76	2.39694e+09	640	70.7961	7.35693
	A2	Sequence	# PSMs	# Proteins	# Protein Groups	Protein Group Accessions	Modifications	ΔCn	Area	q-Value	PEP	XCorr	Charge	MH+ [Da]	ΔM [ppm]	RT [min]	# Missed Cleavages
	High	KGADSLEDFLYHEGYAcTSIHGDR	2	22	1	A0A0D9SFB3	C17(Carbamidomethyl)	0	4.23511e+08	0	9.583e-09	6.72844	3	2741.22	-2.71894	76.3555	1
	High	TAAFLLPILSQIYSDGPGEALR	4	19	1	A0A0D9SFB3		0	7.29979e+08	0	1.461e-06	5.21821	4	2332.25	-1.06818	103.436	0
	High	LEQELFSGGNTGINFEK	3	24	1	A0A0D9SFB3		0	4.87724e+08	0	6.498e-07	4.40282	2	1882.91	-1.98893	83.8016	0
	High	SFLLDLLNATGK	1	20	1	A0A0D9SFB3		0	426781482	0	2.817e-05	4.3098	2	1291.72	-1.74575	101.427	0
	High	HVINFDLPSDIEEYVHR	3	22	1	A0A0D9SFB3		0	2424991515	0	3.929e-07	4.29216	3	2083.02	-2.35088	94.0447	0
	High	VRPcVVYGGADIGQQIR	2	22	1	A0A0D9SFB3	C4(Carbamidomethyl)	0	8.26916e+08	0	0.0007907	4.26077	3	1888.01	12.0952	58.0594	0
	High	NINITKDLLDLLVEAK	1	21	1	A0A0D9SFB3		0	5.18098e+07	0	1.034e-07	4.09541	3	1812.04	-3.24332	101.619	1
	High	SPILVATAVAAR	6	22	1	A0A0D9SFB3		0	2465831001	0	0.0001786	3.79237	2	1168.7	-2.41921	63.2102	0
	High	VGNLGLATSFFNER	5	20	1	A0A0D9SFB3		0	2.3e+09	0	0.0001394	3.61611	3	1524.78	-2.3076	92.0203	0
	High	DFLDEYIFLAVGR	2	22	1	A0A0D9SFB3		0	4.01033e+07	0	0.0001394	3.33305	3	1557.79	-1.88538	104.001	0
	High	RKQYPISLVLAPTR	2	20	1	A0A0D9SFB3		0	6.98058e+08	0	0.0001394	3.2112	3	1641.98	-2.34043	55.9622	2
	High	DSLTLVFVETK	1	20	1	A0A0D9SFB3		0	1.52156e+08	0	0.0001394	3.12581	2	1251.68	-1.65651	92.7962	0
	High	ELAVQIYEEAR	5	20	1	A0A0D9SFB3		0	9.30823e+08	0	0.0002072	3.10738	2	1320.68	-3.2126	67.8327	0
	High	KQYPISLVLAPTR	2	20	1	A0A0D9SFB3		0	2.03079e+08	0	0.0001394	3.09108	2	1485.87	-2.79291	67.7719	1
	High	mLDmGFEPQIR	1	37	3	B4DN41;A0A1X7SBZ2;A0A0D9SFB3	M1(Oxidation); M4(Oxidation)	0	4.07727e+08	0	0.0001394	3.06964	2	1368.63	-2.32746	60.298	0
	High	RIVEQDTmPPK	1	23	1	A0A0D9SFB3	M8(Oxidation)	0	2.86754e+07	0	0.0001428	3.04333	3	1329.68	-2.37611	24.4797	1
	High	ELAVQIYEEARK	2	20	1	A0A0D9SFB3		0	2.43636e+08	0	0.0001394	2.94794	2	1448.77	-3.18084	55.6011	1
	High	YTRPTPVQK	1	25	1	A0A0D9SFB3		0	447990	0	0.0001394	2.88695	3	1089.6	-1.77791	13.0238	0
	High	SGKSPILVATAVAAR	2	22	1	A0A0D9SFB3		0	2.6508e+08	0	0.0001394	2.79567	2	1440.85	-2.40843	51.63	1
	High	YLVLDEADR	1	25	1	A0A0D9SFB3		0	5.9043e+08	0	0.0001394	2.64564	2	1093.55	-2.83233	56.4644	0
	High	QYPISLVLAPTR	2	20	1	A0A0D9SFB3		0	4.61026e+08	0	0.0001739	2.60395	2	1357.78	-2.33768	87.9732	0
	High	DLLDLLVEAK	2	23	1	A0A0D9SFB3		0	7.57704e+08	0	0.0005483	2.56285	2	1128.65	-1.15486	102.35	0
	High	DREEALHQFR	3	23	1	A0A0D9SFB3		0	1099691232	0	0.0008712	2.54563	3	1300.64	-1.70085	27.1148	1
	High	DKDAYSSFGSR	2	28	1	A0A0D9SFB3		0	631721741	0	0.0001416	2.40817	2	1232.55	-2.9748	28.4316	1
	High	GKIGLDFcK	2	23	1	A0A0D9SFB3	C8(Carbamidomethyl)	0	1.0784e+08	0	0.002434	2.3588	2	1037.54	-2.50725	40.6063	1
	High	SGFGKFER	1	20	1	A0A0D9SFB3		0	6.28375e+07	0	0.002507	2.14924	3	927.466	-2.05614	26.1757	1
	High	MLDmGFEPQIR	1	37	3	B4DN41;A0A1X7SBZ2;A0A0D9SFB3	M4(Oxidation)	0	7.36487e+06	0	0.002085	2.1372	2	1352.63	-1.87273	68.2925	0
	High	GcHLLVATPGR	1	22	1	A0A0D9SFB3	C2(Carbamidomethyl)	0	239530543	0.001	0.005941	2.64153	3	1180.62	-2.80168	35.7146	0
	High	IGLDFcK	1	23	1	A0A0D9SFB3	C6(Carbamidomethyl)	0	2.72972e+08	0.001	0.006185	2.34945	2	852.427	-2.2102	56.3708	0
	High	FSGGFGAR	1	23	1	A0A0D9SFB3		0	8.3937e+08	0.001	0.004418	2.27403	2	798.388	-2.25642	30.2242	0
	High	VVWVEESDKR	1	19	1	A0A0D9SFB3		0	530637829	0.001	0.006985	2.25621	2	1246.64	-3.38187	32.275	1
	High	HTmmFSATFPK	3	23	1	A0A0D9SFB3	M3(Oxidation); M4(Oxidation)	0	3.91706e+08	0.002	0.007069	2.29484	2	1329.59	-2.52858	39.458	0
	High	GLDISNVK	1	20	1	A0A0D9SFB3		0	7.4085e+08	0.002	0.007086	2.20382	2	845.471	-1.93308	39.3313	0
	High	HAIPIIK	1	25	1	A0A0D9SFB3		0	1038541904	0.002	0.007124	1.94309	2	791.511	-2.9818	30.7576	0
	High	IVEQDTmPPKGVR	1	23	1	A0A0D9SFB3	M7(Oxidation)	0	0	0.002	0.007069	1.85405	2	1485.77	-3.42205	28.3419	1
	High	SDEDDWSKPLPPSER	1	20	1	A0A0D9SFB3		0	3.51732e+06	0.002	0.007069	1.72277	2	1757.8	-1.31616	49.1413	0
	High	DAYSSFGSR	1	28	1	A0A0D9SFB3		0	2.46812e+07	0.002	0.007302	1.62222	2	989.429	-3.05575	35.951	0
	High	QEVPSWLENmAYEHHYK	1	23	1	A0A0D9SFB3	M10(Oxidation)	0	5.01535e+08	0.003	0.02275	1.79044	4	2176.97	-2.35398	58.7343	0
	High	IVEQDTmPPK	1	23	1	A0A0D9SFB3	M7(Oxidation)	0	2.90307e+08	0.004	0.0358	2.65064	2	1173.58	-2.69371	26.2583	0
	High	GRYIPPHLR	1	24	1	A0A0D9SFB3		0	0	0.004	0.03689	1.74799	3	1108.64	-2.04287	26.6077	1
	High	SSFFSDR	1	23	1	A0A0D9SFB3		0	5.62779e+08	0.004	0.04145	1.49301	2	845.377	-2.17723	36.6916	0
P42166	Lamina-associated polypeptide 2, isoform alpha OS=Homo sapiens OX=9606 GN=TMPO PE=1 SV=2 - [LAP2A_HUMAN]	186.68	62.39	1	22	32	65	1.74255e+09	694	75.4456	7.66455
	A2	Sequence	# PSMs	# Proteins	# Protein Groups	Protein Group Accessions	Modifications	ΔCn	Area	q-Value	PEP	XCorr	Charge	MH+ [Da]	ΔM [ppm]	RT [min]	# Missed Cleavages
	High	AYEAAASALQIATHTAFVAK	3	1	1	P42166		0	1.29065e+08	0	1.907e-09	5.20496	2	2034.06	-2.3769	89.343	0
	High	GPPDFSSDEEREPTPVLGSGAAAAGR	3	5	2	P42166;P42167		0	1.87331e+09	0	2.012e-08	5.13027	3	2570.2	-2.78392	66.1087	1
	High	QSQHDKIDASELSFPFHESILK	2	1	1	P42166		0	4.74667e+08	0	0.0001394	4.63749	3	2556.27	-1.72222	78.6324	1
	High	KALEESESSQLISPPLAQAIR	2	1	1	P42166		0	3.48378e+08	0	1.115e-06	4.58154	2	2267.22	-1.44072	77.0129	1
	High	TYDAASYIcEAAFDEVK	3	1	1	P42166	C9(Carbamidomethyl)	0	1.42748e+08	0	1.114e-07	4.51386	3	1952.86	-1.05997	97.8265	0
	High	ALEESESSQLISPPLAQAIR	3	1	1	P42166		0	6.30492e+08	0	0.0001394	4.48405	3	2139.13	-1.73334	91.6756	0
	High	AmQADISQAAQILSSDPSR	4	1	1	P42166	M2(Oxidation)	0	2.17537e+08	0	0.0001394	4.40542	2	2004.96	-3.15228	78.3946	0
	High	VIEEEWQQVDR	1	1	1	P42166		0	788891346	0	0.0001394	3.87955	2	1430.69	-2.14262	57.2537	0
	High	TVVSHSLTTLGLEVAK	5	1	1	P42166		0	5.61212e+08	0	0.0001394	3.85856	2	1654.93	-2.39407	68.4598	0
	High	DKLKSELVANNVTLPAGEQR	1	5	2	P42166;P42167		0	1.86516e+07	0	0.0001206	3.79303	2	2182.18	-2.15619	57.1735	2
	High	KDVYVQLYLQHLTAR	3	5	2	P42166;P42167		0	74574724	0	1.122e-06	3.77026	3	1847.01	-1.4936	70.6677	1
	High	DVYVQLYLQHLTAR	2	5	2	P42166;P42167		0	3.10833e+08	0	5.161e-05	3.70422	2	1718.92	-1.95257	92.3424	0
	High	ETTTGYYKDIVENIcGR	2	1	1	P42166	C15(Carbamidomethyl)	0	1.86287e+08	0	0.0001394	3.5002	3	2018.94	-2.70031	76.5396	1
	High	LKSELVANNVTLPAGEQRK	2	5	2	P42166;P42167		0	1.43202e+08	0	0.0007381	3.47868	4	2067.15	-2.77492	46.9587	2
	High	LKSELVANNVTLPAGEQR	1	5	2	P42166;P42167		0	329999032	0	0.0001394	3.35688	3	1939.06	-2.60542	57.1717	1
	High	QEDKDDLDVTELTNEDLLDQLVK	3	6	2	P42166;P42167		0	76690054	0	0.0008936	3.3398	2	2688.32	2.24835	100.9	1
	High	GDLPREPLVATNLPGR	2	1	1	P42166		0	6.03893e+08	0	0.0001394	3.15761	3	1704.94	-2.11107	65.4087	1
	High	DSGSFVAFQNIPGSELmSSFAK	2	1	1	P42166	M17(Oxidation)	0	151423203	0	0.0002614	3.12077	2	2335.09	-1.5041	100.47	0
	High	FQETEFLSPPR	2	1	1	P42166		0	8.42306e+08	0	0.0001394	2.99461	2	1350.67	-2.46275	69.3195	0
	High	DIVPFSELGTTPSGGGFFQGISFPEISTRPPLGSTELQAAK	2	1	1	P42166		0	431297418	0	0.0006154	2.75057	3	4236.14	-1.64766	102.378	0
	High	DIVENIcGR	1	1	1	P42166	C7(Carbamidomethyl)	0	80470043	0	0.0002731	2.683	2	1075.52	-1.98357	52.4077	0
	High	LASTPFKGGTLFGGEVcK	1	1	1	P42166	C17(Carbamidomethyl)	0	6.9414e+06	0	0.00209	2.59355	2	1868.96	-1.32137	68.1688	1
	High	SSTPLPTISSSAENTR	1	6	2	P42166;P42167		0	1.34776e+09	0	2.638e-06	2.37835	2	1647.81	-2.71199	52.9112	0
	High	IDASELSFPFHESILK	1	1	1	P42166		0	6.08411e+07	0	0.0001394	2.22615	3	1832.94	0.430149	98.7032	0
	High	YGVNPGPIVGTTR	3	6	2	P42166;P42167		0	2.00657e+09	0	0.001324	2.17521	2	1330.71	-1.52784	54.9895	0
	High	SSSSSSQPEHSAmLVSTAASPSLIK	2	1	1	P42166	M13(Oxidation)	0	2.20129e+08	0.002	0.0123	2.89546	3	2505.21	-2.33329	58.4723	0
	High	NLFIScK	1	1	1	P42166	C6(Carbamidomethyl)	0	125748828	0.002	0.007495	2.26683	2	881.453	-2.05649	44.0292	0
	High	EPLVATNLPGR	2	1	1	P42166		0	5.34412e+08	0.002	0.01026	1.9481	2	1166.65	-2.49549	57.0193	0
	High	THQALGILSK	1	1	1	P42166		0	357616933	0.002	0.00709	1.48392	2	1067.62	-3.80706	32.3759	0
	High	SGIQPLcPER	1	1	1	P42166	C7(Carbamidomethyl)	0	2.51602e+08	0.004	0.0431	1.39184	2	1156.58	-2.46803	40.9018	0
	High	VHTSKGDLPREPLVATNLPGR	1	1	1	P42166		0	2.02264e+07	0.005	0.04562	2.16494	3	2257.24	-2.19297	48.8619	2
	High	NRPPLPAGTNSK	2	5	2	P42166;P42167		0	8.58899e+08	0.006	0.0613	1.12614	2	1251.68	-2.14858	24.305	0
Q8NCA5	Protein FAM98A OS=Homo sapiens OX=9606 GN=FAM98A PE=1 SV=2 - [FA98A_HUMAN]	179.054	56.95	42	17	22	63	4417592408	518	55.2382	8.95361
	A2	Sequence	# PSMs	# Proteins	# Protein Groups	Protein Group Accessions	Modifications	ΔCn	Area	q-Value	PEP	XCorr	Charge	MH+ [Da]	ΔM [ppm]	RT [min]	# Missed Cleavages
	High	HQGGWTDGGSGGGGGYQDGGYR	6	5	1	Q8NCA5		0	1022687125	0	1.428e-07	5.96327	3	2125.86	-3.27755	36.024	0
	High	IEAINQAIANEYEVR	5	5	1	Q8NCA5		0	2.74817e+09	0	2.011e-06	4.6351	3	1732.88	-1.90344	74.7786	0
	High	GSQNYHQGGQFEQHFQHGGYQYNHSGFGQGR	1	5	1	Q8NCA5		0	2.2827e+07	0	0.0001394	4.54511	4	3537.52	-2.3037	41.4278	0
	High	DSGFQPGGYHGGHSSGGYQGGGYGGFQTSSSYTGSGYQGGGYQQDNR	3	4	1	Q8NCA5		0	1.61529e+09	0	0.0001394	4.29026	4	4711.93	-2.1918	63.5367	0
	High	LDVTVQSFGWSDR	3	6	2	Q8NCA5;Q52LJ0		0	7.05841e+08	0	1.172e-05	4.09132	2	1509.73	-2.73408	87.2424	0
	High	RLDVTVQSFGWSDR	5	6	2	Q8NCA5;Q52LJ0		0	1541826027	0	1.044e-05	4.07537	2	1665.83	-2.21224	74.0503	1
	High	AQEGGGSEVFQELK	4	5	1	Q8NCA5		0	1230506769	0	4.971e-05	4.01485	2	1478.71	-2.00525	56.239	0
	High	GPLLEDGALSQAVSAGASSPEFTK	2	5	1	Q8NCA5		0	6.73854e+07	0	5.766e-08	3.9828	2	2332.16	-2.10469	94.6055	0
	High	NcLLLLTYLISELEAAR	2	4	1	Q8NCA5	C2(Carbamidomethyl)	0	6.00561e+06	0	1.902e-05	3.85777	3	1992.08	0.257633	105.043	0
	High	GGRPNEIEPPPPEmPPWQK	7	6	2	Q8NCA5;Q52LJ0	M14(Oxidation)	0	6.67614e+09	0	0.0001394	3.56748	3	2172.05	-2.79153	57.1949	0
	High	GGRPNEIEPPPPEmPPWQKR	1	6	2	Q8NCA5;Q52LJ0	M14(Oxidation)	0	2.08874e+08	0	0.002429	3.43386	3	2328.15	-3.48916	49.1955	1
	High	GIcIALGmSKPPANITmFQFFSGIEK	1	5	1	Q8NCA5	C3(Carbamidomethyl); M8(Oxidation); M17(Oxidation)	0	1.24085e+08	0	0.0001394	3.42385	3	2889.43	-0.149824	99.7965	0
	High	KAQEGGGSEVFQELK	2	5	1	Q8NCA5		0	7.83799e+08	0	6.035e-05	3.31613	2	1606.8	-2.37675	42.2617	1
	High	GIcIALGmSKPPANITmFQFFSGIEKK	2	5	1	Q8NCA5	C3(Carbamidomethyl); M8(Oxidation); M17(Oxidation)	0	1.0775e+08	0	0.000297	3.21663	3	3017.53	0.079265	98.319	1
	High	LcAWLVSELR	4	5	1	Q8NCA5	C2(Carbamidomethyl)	0	9.40073e+08	0	0.0001394	2.85796	2	1246.66	-2.75199	88.0056	0
	High	KPmGPAHWEK	1	4	1	Q8NCA5	M3(Oxidation)	0	12908838	0	0.0005536	2.83499	3	1196.59	-2.43783	20.8765	0
	High	VPDRGGRPNEIEPPPPEmPPWQK	1	6	2	Q8NCA5;Q52LJ0	M18(Oxidation)	0	62015335	0	0.003046	2.72706	3	2639.29	-3.40449	55.2267	1
	High	TTISVAHLLAAR	7	6	1	Q8NCA5		0	3.82846e+09	0	0.0001394	2.40546	2	1252.73	-2.16058	62.1413	0
	High	mLcVNAPPKK	2	5	1	Q8NCA5	M1(Oxidation); C3(Carbamidomethyl)	0	110540989	0.003	0.02493	2.5231	3	1173.61	-2.20021	25.035	1
	High	VPPNHVGKPLLK	2	5	1	Q8NCA5		0	1.13356e+09	0.004	0.03122	2.10962	2	1298.79	-2.27278	26.6485	0
	High	IEAINQAIANEYEVRR	1	5	1	Q8NCA5		0	9.06261e+08	0.006	0.06601	1.49735	3	1888.98	-3.22438	63.3592	1
	High	LLIQK	1	38	1	Q8NCA5		0	3.0883e+08	0.009	0.09487	1.79498	2	614.422	-2.73216	28.1328	0
Q9Y2W1	Thyroid hormone receptor-associated protein 3 OS=Homo sapiens OX=9606 GN=THRAP3 PE=1 SV=2 - [TR150_HUMAN]	178.237	34.45	6	34	35	70	2.26471e+09	955	108.601	10.1548
	A2	Sequence	# PSMs	# Proteins	# Protein Groups	Protein Group Accessions	Modifications	ΔCn	Area	q-Value	PEP	XCorr	Charge	MH+ [Da]	ΔM [ppm]	RT [min]	# Missed Cleavages
	High	SSSKDSRPSQAAGDNQGDEAKEQTFSGGTSQDTK	1	2	1	Q9Y2W1		0	5.32913e+07	0	0.0001394	4.83619	4	3501.55	-2.04717	25.6447	2
	High	KTEELEEESFPER	3	2	1	Q9Y2W1		0	2157166320	0	0.0001394	4.55106	3	1622.75	-1.96297	41.0782	1
	High	SPSELFAQHIVTIVHHVK	7	2	1	Q9Y2W1		0	1.72813e+09	0	5.404e-07	4.5306	3	2042.11	-3.36858	69.8209	0
	High	SPPSTGSTYGSSQKEESAASGGAAYTKR	1	6	1	Q9Y2W1		0	7.72244e+07	0	1.005e-05	4.36548	3	2762.28	-2.60702	30.3814	2
	High	KYYLHDDREGEGSDK	2	2	1	Q9Y2W1		0	2.49258e+07	0	1.684e-06	4.2214	2	1811.82	-2.37781	21.4953	2
	High	mDSFDEDLARPSGLLAQER	1	2	1	Q9Y2W1	M1(Oxidation)	0	1428510438	0	0.0001394	4.07047	3	2166.01	-1.07887	78.2267	0
	High	ASESSKPWPDATYGTGSASR	2	6	1	Q9Y2W1		0	2.15324e+09	0	0.0001394	3.71275	3	2054.94	-1.64863	42.7718	0
	High	SGKWEGLVYAPPGKEK	4	2	1	Q9Y2W1		0	6.69446e+08	0	0.0001394	3.39794	2	1745.92	-2.17578	44.461	2
	High	TEELEEESFPER	3	2	1	Q9Y2W1		0	7.21313e+08	0	0.0001394	3.37762	2	1494.66	-2.24518	53.0675	0
	High	GSFSDTGLGDGKmK	2	2	1	Q9Y2W1	M13(Oxidation)	0	8.17899e+07	0	0.0001394	3.35506	2	1415.64	-2.977	29.5639	1
	High	DSRPSQAAGDNQGDEAKEQTFSGGTSQDTK	2	2	1	Q9Y2W1		0	3.51892e+08	0	0.0001394	3.29959	3	3112.36	-2.66504	31.0341	1
	High	SPPSTGSTYGSSQKEESAASGGAAYTK	1	6	1	Q9Y2W1		0	1.50319e+08	0	0.0001394	3.22898	3	2606.18	-3.16715	33.887	1
	High	KESEFDDEPKFmSK	1	2	1	Q9Y2W1	M12(Oxidation)	0	0	0	0.0001394	3.14772	2	1732.77	-2.91792	32.1403	2
	High	ASAVSELSPR	2	6	1	Q9Y2W1		0	874949572	0	0.0001394	3.11677	2	1016.53	-2.63628	35.175	0
	High	EHHFGSSGmTLHER	2	2	1	Q9Y2W1	M9(Oxidation)	0	286012165	0	0.0001394	3.10972	2	1640.72	-2.03321	21.5845	0
	High	EKGSFSDTGLGDGK	1	2	1	Q9Y2W1		0	3.6867e+07	0	0.0001394	3.03696	2	1397.65	-3.09039	29.1473	1
	High	GSFSDTGLGDGK	3	2	1	Q9Y2W1		0	1345254491	0	0.0001394	3.02914	2	1140.51	-3.04077	37.1786	0
	High	SIFQHIQSAQSQR	3	2	1	Q9Y2W1		0	2.48372e+09	0	0.0001394	2.82644	2	1529.78	-2.50855	38.9088	0
	High	EEEWDPEYTPK	2	5	2	Q9NYF8;Q9Y2W1		0	3.3752e+08	0	0.0001529	2.63054	2	1422.6	-1.64206	56.2459	0
	High	SPLQSVVVR	2	6	1	Q9Y2W1		0	1.27996e+09	0	0.0006427	2.59282	2	984.581	-2.32976	46.6382	0
	High	NREEEWDPEYTPK	3	2	1	Q9Y2W1		0	1039031385	0	0.0002431	2.58634	3	1692.75	-2.11324	43.25	1
	High	DLVHSNKKEQEFR	2	2	1	Q9Y2W1		0	1.69507e+07	0	0.0001724	2.35799	2	1629.83	-2.77926	23.5289	2
	High	WEGLVYAPPGKEK	2	2	1	Q9Y2W1		0	3.47207e+07	0	0.0005219	2.00303	3	1473.77	-1.57069	53.5507	1
	High	YKDDPVDLR	2	2	1	Q9Y2W1		0	1.31523e+09	0.001	0.006609	2.68413	3	1120.56	-2.15433	33.4739	1
	High	SGKWEGLVYAPPGK	2	2	1	Q9Y2W1		0	1.06168e+09	0.001	0.006463	2.35615	3	1488.78	-1.37388	55.553	1
	High	ESEFDDEPKFmSK	2	2	1	Q9Y2W1	M11(Oxidation)	0	2.52403e+08	0.002	0.007102	2.8522	2	1604.68	-1.78199	42.7752	1
	High	SPSELFAQHIVTIVHHVKEHHFGSSGmTLHER	3	2	1	Q9Y2W1	M27(Oxidation)	0	574680532	0.002	0.01296	2.81892	7	3663.82	-2.22748	68.5753	1
	High	YYLHDDREGEGSDK	2	2	1	Q9Y2W1		0	5.81028e+07	0.002	0.007069	2.27431	3	1683.72	-2.74837	23.5771	1
	High	ESEFDDEPK	1	2	1	Q9Y2W1		0	6.22945e+08	0.002	0.008533	1.66096	2	1095.44	-2.72177	29.1624	0
	High	RIDISPSTFRK	1	2	1	Q9Y2W1		0	1.33304e+08	0.003	0.01564	2.49235	3	1319.74	-2.70183	37.565	2
	High	RNREEEWDPEYTPK	1	2	1	Q9Y2W1		0	10760089	0.005	0.049	1.96936	2	1848.85	-1.95231	35.136	2
	High	EEKDNIQPTTE	1	1	1	Q9Y2W1		0	5.96986e+07	0.006	0.05908	2.55763	2	1303.6	-2.08113	26.3537	1
	High	YKDDPVDLRLDIER	1	2	1	Q9Y2W1		0	4.08405e+08	0.007	0.07434	1.9882	3	1746.9	-2.01302	63.5121	2
	High	SSFSITR	1	2	1	Q9Y2W1		0	995341193	0.008	0.08817	1.61084	2	797.413	-3.2305	32.314	0
	High	AEEYTEETEEREESTTGFDK	1	2	1	Q9Y2W1		0	6.80518e+07	0.009	0.1043	2.39365	3	2379.99	-2.06724	45.615	1
Q9Y224	RNA transcription, translation and transport factor protein OS=Homo sapiens OX=9606 GN=RTRAF PE=1 SV=1 - [RTRAF_HUMAN]	173.699	78.69	10	26	26	63	2.12972e+09	244	28.0507	6.65381
	A2	Sequence	# PSMs	# Proteins	# Protein Groups	Protein Group Accessions	Modifications	ΔCn	Area	q-Value	PEP	XCorr	Charge	MH+ [Da]	ΔM [ppm]	RT [min]	# Missed Cleavages
	High	EGLPVALDKHILGFDTGDAVLNEAAQILR	3	2	1	Q9Y224		0	1.10713e+09	0	4.281e-08	6.06796	3	3075.64	-1.9237	101.674	1
	High	HILGFDTGDAVLNEAAQILR	3	2	1	Q9Y224		0	1157180594	0	9.5e-11	5.55518	2	2153.13	-1.8114	101.499	0
	High	KLTALDYHNPAGFNcKDETEFR	2	4	1	Q9Y224	C15(Carbamidomethyl)	0	6.12123e+08	0	4.123e-06	5.05537	3	2626.23	-3.34531	57.6924	2
	High	NAEPLINLDVNNPDFK	6	4	1	Q9Y224		0	2.62687e+09	0	2.386e-05	4.63756	3	1812.91	-1.60908	89.7661	0
	High	INEAIVAVQAIIADPK	2	2	1	Q9Y224		0	9.5268e+08	0	2.215e-06	4.61215	2	1664.96	-0.404917	99.7932	0
	High	KLTALDYHNPAGFNcK	2	4	1	Q9Y224	C15(Carbamidomethyl)	0	1.82767e+08	0	1.225e-07	4.48248	2	1848.9	-2.65162	48.4572	1
	High	LTALDYHNPAGFNcK	2	4	1	Q9Y224	C14(Carbamidomethyl)	0	1.79327e+08	0	1.849e-06	4.21496	2	1720.81	-1.92722	57.281	0
	High	INEAIVAVQAIIADPKTDHR	2	2	1	Q9Y224		0	5.72601e+07	0	1.933e-07	4.17067	4	2174.19	-2.86778	82.6138	1
	High	AGVmALANLLQIQR	9	4	1	Q9Y224	M4(Oxidation)	0	1.32541e+09	0	0.0001394	4.07671	2	1513.85	-1.1421	97.4503	0
	High	LTALDYHNPAGFNcKDETEFR	3	4	1	Q9Y224	C14(Carbamidomethyl)	0	4.65397e+08	0	0.0001394	3.80359	2	2498.14	-0.457702	64.9972	1
	High	QEAIDWLLGLAVR	3	4	1	Q9Y224		0	336486675	0	0.0001394	3.09918	2	1483.82	-1.6396	102.478	0
	High	IQDRQEAIDWLLGLAVR	1	4	1	Q9Y224		0	61869800	0	0.0001394	3.01046	2	1996.1	-1.26397	100.951	1
	High	LEYGDNAEKYKDLVPDNSK	1	4	1	Q9Y224		0	8.51479e+08	0	0.0001394	2.81549	3	2198.06	-2.52636	56.4886	2
	High	HDDYLVmLK	2	4	1	Q9Y224	M7(Oxidation)	0	964105706	0	0.0007308	2.77613	2	1149.56	-2.50992	47.4439	0
	High	AGVMALANLLQIQR	1	4	1	Q9Y224		0	6.96196e+06	0	0.0001394	2.7294	2	1497.86	-0.392821	100.421	0
	High	NFIVWLEDQK	5	4	1	Q9Y224		0	1357083616	0	0.0001394	2.68648	2	1291.67	-2.38811	94.2903	0
	High	LLHIEELR	5	2	1	Q9Y224		0	1.78818e+09	0	0.003223	2.0891	3	1022.6	-1.80325	49.7407	0
	High	RKLTALDYHNPAGFNcK	1	4	1	Q9Y224	C16(Carbamidomethyl)	0	16558562	0.001	0.007069	2.57445	3	2005	-3.50973	40.7313	2
	High	DVNcPFK	1	4	1	Q9Y224	C4(Carbamidomethyl)	0	4.2328e+08	0.002	0.009344	2.00997	2	879.401	-2.44583	35.22	0
	High	LEYGDNAEKYK	1	4	1	Q9Y224		0	1.22091e+08	0.002	0.007114	1.80099	2	1329.63	-3.14676	28.1877	1
	High	NIHSSDWPK	1	4	1	Q9Y224		0	6.00008e+08	0.002	0.01155	1.66039	3	1083.52	-1.94118	25.3616	0
	High	NAEPLINLDVNNPDFKAGVmALANLLQIQR	1	4	1	Q9Y224	M20(Oxidation)	0	1.23674e+08	0.003	0.01646	2.85353	3	3307.74	-1.24717	103.162	1
	High	YKDLVPDNSK	1	4	1	Q9Y224		0	1.14701e+09	0.003	0.02086	2.48988	2	1178.6	-2.13182	27.2052	1
	High	EGLPVALDK	2	2	1	Q9Y224		0	1.97412e+09	0.003	0.02075	1.39733	2	941.528	-2.22669	55.9589	0
	High	YLRDVNcPFK	1	3	1	Q9Y224	C7(Carbamidomethyl)	0	1.49859e+08	0.005	0.0445	1.73185	2	1311.65	-1.9929	43.0721	1
	High	ILVQER	1	9	1	Q9Y224		0	1.55185e+09	0.007	0.07858	1.48261	2	757.455	-2.40241	26.302	0
	High	NFIVWLEDQKIR	1	3	1	Q9Y224		0	9.14548e+06	0.009	0.1033	1.37615	3	1560.85	-3.71142	89.9068	1
B4DLR3	cDNA FLJ54020, highly similar to Heterogeneous nuclear ribonucleoprotein U OS=Homo sapiens OX=9606 PE=2 SV=1 - [B4DLR3_HUMAN]	171.529	44.77	21	33	33	63	2.05409e+09	784	86.8064	6.43018
	A2	Sequence	# PSMs	# Proteins	# Protein Groups	Protein Group Accessions	Modifications	ΔCn	Area	q-Value	PEP	XCorr	Charge	MH+ [Da]	ΔM [ppm]	RT [min]	# Missed Cleavages
	High	EVLAGRPLFPHVLcHNcAVEFNFGQK	2	15	1	B4DLR3	C14(Carbamidomethyl); C17(Carbamidomethyl)	0	4.95585e+08	0	4.923e-11	6.53484	3	3039.5	-2.18796	83.5358	0
	High	ISKEVLAGRPLFPHVLcHNcAVEFNFGQK	3	15	1	B4DLR3	C17(Carbamidomethyl); C20(Carbamidomethyl)	0	1.02194e+08	0	5.139e-07	5.48032	3	3367.72	-0.292324	79.0099	1
	High	NFILDQTNVSAAAQR	5	16	1	B4DLR3		0	1.6913e+09	0	4.192e-07	4.67839	2	1647.84	-2.19991	70.4313	0
	High	LQAALDDEEAGGRPAmEPGNGSLDLGGDSAGR	1	5	1	B4DLR3	M16(Oxidation)	0	713617587	0	0.0001394	4.37465	3	3142.42	-3.01564	67.9431	0
	High	SSGPTSLFAVTVAPPGAR	4	8	1	B4DLR3		0	2.85537e+09	0	0.0001394	4.31164	3	1714.91	-2.47016	89.1794	0
	High	KAEVEGKDLPEHAVLK	3	16	1	B4DLR3		0	1.74065e+08	0	0.0001394	3.94588	3	1762.97	-2.10535	32.0786	2
	High	EKPYFPIPEEYTFIQNVPLEDR	1	15	1	B4DLR3		0	1.28907e+09	0	4.71e-06	3.8754	3	2724.35	-1.31274	100.133	0
	High	NQSQGYNQWQQGQFWGQKPWSQHYHQGYY	1	10	1	B4DLR3		0	3.90288e+08	0	0.0001394	3.87306	3	3658.6	-2.57708	75.4595	0
	High	LSASSLTmESFAFLWAGGR	2	15	1	B4DLR3	M8(Oxidation)	0	3.00542e+07	0	0.0001394	3.8713	3	2046.99	-1.48586	101.457	0
	High	HAAENPGKYNILGTNTImDK	4	16	1	B4DLR3	M18(Oxidation)	0	9.18222e+08	0	0.0001394	3.53938	3	2203.07	-3.27565	47.8268	1
	High	KDcEVVmmIGLPGAGK	1	16	1	B4DLR3	C3(Carbamidomethyl); M7(Oxidation); M8(Oxidation)	0	18007746	0	0.0001394	3.37765	2	1736.83	-1.9178	57.0031	1
	High	GYFEYIEENKYSR	4	8	1	B4DLR3		0	1.12266e+09	0	0.0001394	3.36343	2	1697.78	-2.83127	62.6714	1
	High	RNFILDQTNVSAAAQR	1	16	1	B4DLR3		0	1.12634e+08	0	0.0001394	3.23602	3	1803.94	-2.44839	57.1117	1
	High	YNILGTNTImDK	3	16	1	B4DLR3	M10(Oxidation)	0	6.23023e+08	0	0.0001394	3.21188	2	1398.69	-2.61061	62.0962	0
	High	KQmADTGKLNTLLQR	2	17	1	B4DLR3	M3(Oxidation)	0	162873834	0	0.0001394	3.06342	3	1732.93	-2.59603	38.6871	2
	High	IGWSLTTSGmLLGEEEFSYGYSLK	2	14	1	B4DLR3	M10(Oxidation)	0	630282	0	0.0001394	3.03828	3	2684.28	0.77614	107.177	0
	High	LKVSELKEELK	2	6	1	B4DLR3		0	7.86596e+07	0	0.001224	2.90398	2	1315.78	-2.01107	40.145	2
	High	LLEQYKEESKK	2	14	1	B4DLR3		0	9.62165e+08	0	0.0001394	2.78509	2	1394.75	-2.10784	23.7647	2
	High	AEVEGKDLPEHAVLK	1	16	1	B4DLR3		0	2.43025e+06	0	0.0001394	2.75981	2	1634.87	-2.00118	39.5833	1
	High	GYFEYIEENK	1	8	1	B4DLR3		0	2.30325e+08	0	0.0007515	2.69764	2	1291.58	-1.78587	66.5637	0
	High	NGQDLGVAFK	1	15	1	B4DLR3		0	1.0847e+09	0	0.001609	2.61028	2	1048.54	-2.75341	48.0478	0
	High	KmcLFAGFQR	1	16	1	B4DLR3	M2(Oxidation); C3(Carbamidomethyl)	0	3.30693e+07	0	0.0005997	2.54098	3	1273.61	-2.44732	46.663	1
	High	DRLSASSLTmESFAFLWAGGR	1	15	1	B4DLR3	M10(Oxidation)	0	3.25666e+07	0.001	0.003755	2.98344	3	2318.11	-4.61116	100.885	1
	High	VSELKEELKK	3	6	1	B4DLR3		0	3.88653e+08	0.001	0.0059	2.95279	2	1202.7	-2.63645	23.566	2
	High	AVVVcPKDEDYK	1	16	1	B4DLR3	C5(Carbamidomethyl)	0	9.09098e+06	0.002	0.007069	2.77506	2	1422.69	-2.83031	31.3802	1
	High	QmADTGKLNTLLQR	2	17	1	B4DLR3	M2(Oxidation)	0	5.03738e+08	0.002	0.007069	2.38916	3	1604.84	-2.08107	49.5247	1
	High	DLPEHAVLK	1	16	1	B4DLR3		0	1.61558e+09	0.002	0.007069	1.97604	2	1021.56	-2.79411	38.0043	0
	High	FIEIAAR	2	17	1	B4DLR3		0	7.65036e+08	0.002	0.01371	1.70125	2	819.471	-2.03987	46.9181	0
	High	GLKAELmER	1	6	1	B4DLR3	M7(Oxidation)	0	3.88337e+07	0.003	0.01744	2.63241	3	1062.56	-2.92329	26.6726	1
	High	DIDIHEVR	2	15	1	B4DLR3		0	9.05843e+08	0.003	0.02172	1.9691	2	996.509	-2.28572	37.4713	0
	High	LNTLLQR	1	17	1	B4DLR3		0	6.34849e+08	0.004	0.04219	1.5962	2	857.518	-2.40717	38.9776	0
	High	LLEQYKEESK	1	14	1	B4DLR3		0	2.7904e+08	0.006	0.07016	1.91972	2	1266.65	-2.99617	27.724	1
	High	RKmcLFAGFQR	1	16	1	B4DLR3	M3(Oxidation); C4(Carbamidomethyl)	0	5.84655e+07	0.008	0.08675	1.6091	3	1429.72	-2.46828	35.3956	2
A0A384NYT8	Tubulin beta chain (Fragment) OS=Homo sapiens OX=9606 PE=2 SV=1 - [A0A384NYT8_HUMAN]	166.562	62.9	50	6	24	65	8.54867e+08	442	49.4369	4.89404
	A2	Sequence	# PSMs	# Proteins	# Protein Groups	Protein Group Accessions	Modifications	ΔCn	Area	q-Value	PEP	XCorr	Charge	MH+ [Da]	ΔM [ppm]	RT [min]	# Missed Cleavages
	High	SGPFGQIFRPDNFVFGQSGAGNNWAK	2	28	2	A0A384NYT8;P68371		0	5.52263e+08	0	6.54e-05	4.69052	3	2798.34	-1.23298	99.7351	0
	High	GHYTEGAELVDSVLDVVRK	3	28	2	A0A384NYT8;P68371		0	5.27719e+08	0	2.432e-07	4.53769	2	2087.07	-1.94042	91.3756	1
	High	mAVTFIGNSTAIQELFK	2	17	1	A0A384NYT8	M1(Oxidation)	0	7.23408e+07	0	0.0001394	4.11477	3	1885.97	-0.76173	100.401	0
	High	LHFFmPGFAPLTSR	6	42	2	A0A384NYT8;P68371	M5(Oxidation)	0	9.08286e+08	0	0.0001394	3.87934	3	1636.83	-1.81907	84.0838	0
	High	ALTVPELTQQVFDAK	4	14	1	A0A384NYT8		0	8.48389e+08	0	0.0001394	3.74776	3	1659.89	-1.94491	98.0335	0
	High	mSmKEVDEQmLNVQNK	3	30	2	A0A384NYT8;P68371	M1(Oxidation); M3(Oxidation); M10(Oxidation)	0	1.20861e+08	0	0.0001394	3.71486	3	1971.88	-3.23029	30.3415	1
	High	EIVHIQAGQcGNQIGAK	3	38	2	P68371;A0A384NYT8	C10(Carbamidomethyl)	0	1.51656e+08	0	6.604e-06	3.54828	3	1822.92	-2.70028	43.9967	0
	High	LTTPTYGDLNHLVSATmSGVTTcLR	3	31	2	A0A384NYT8;P68371	M17(Oxidation); C23(Carbamidomethyl)	0	1.35787e+08	0	0.0001394	3.39132	2	2724.34	1.81771	97.8003	0
	High	GHYTEGAELVDSVLDVVR	2	28	2	A0A384NYT8;P68371		0	2.51302e+08	0	4.511e-07	3.27311	2	1958.98	-1.00833	99.4102	0
	High	EVDEQmLNVQNK	1	31	2	A0A384NYT8;P68371	M6(Oxidation)	0	1.17696e+08	0	0.001067	3.15693	2	1462.68	-2.87485	36.5784	0
	High	LAVNmVPFPR	5	49	3	A0A384NYT8;P68371;Q9H4B7	M5(Oxidation)	0	389505133	0	0.0001394	3.13001	2	1159.63	-3.34806	68.2098	0
	High	ImNTFSVVPSPK	2	29	2	P68371;A0A384NYT8	M2(Oxidation)	0	6.47751e+08	0	0.0001394	3.1251	2	1335.69	-2.16702	61.3767	0
	High	LHFFMPGFAPLTSR	1	42	2	A0A384NYT8;P68371		0	5907625	0	0.0001394	3.12217	3	1620.83	-0.643777	96.3622	0
	High	NSSYFVEWIPNNVK	3	43	2	A0A384NYT8;P68371		0	5.71632e+08	0	8.714e-05	3.00919	2	1696.83	-1.69468	92.4946	0
	High	ISVYYNEATGGK	1	8	1	A0A384NYT8		0	7.41406e+08	0	0.0001394	2.95742	2	1301.63	-1.77162	44.8897	0
	High	AILVDLEPGTmDSVR	3	21	1	A0A384NYT8	M11(Oxidation)	0	8.07926e+08	0	0.0001394	2.83503	2	1631.83	-1.50597	78.6273	0
	High	TAVcDIPPR	6	38	2	A0A384NYT8;P68371	C4(Carbamidomethyl)	0	2.34114e+07	0	0.0001502	2.54934	2	1028.52	-2.78869	36.4294	0
	High	mAVTFIGNSTAIQELFKR	2	17	1	A0A384NYT8	M1(Oxidation)	0	220174415	0	0.001718	2.41593	3	2042.07	-0.72592	96.7916	1
	High	FWEVISDEHGIDPTGTYHGDSDLQLDR	1	6	1	A0A384NYT8		0	6.19596e+08	0	0.0001394	2.34414	4	3102.4	-1.59252	93.21	0
	High	FPGQLNADLRK	4	55	3	A0A384NYT8;P68371;Q9H4B7		0	215824944	0	0.0002644	2.17856	2	1258.69	-2.1957	44.8237	1
	High	IREEYPDRImNTFSVVPSPK	3	17	2	P68371;A0A384NYT8	M10(Oxidation)	0	408561538	0	0.0001394	1.95047	3	2394.21	-1.96373	65.5587	2
	High	FPGQLNADLR	2	55	3	A0A384NYT8;P68371;Q9H4B7		0	222494976	0	0.0005087	1.93176	2	1130.59	-2.66103	60.2132	0
	High	RISEQFTAmFR	1	38	2	A0A384NYT8;P68371	M9(Oxidation)	0	12568891	0.002	0.007069	1.94351	3	1401.69	-3.14636	48.8875	1
	High	IREEYPDR	1	35	3	A0A384NYT8;P68371;Q9H4B7		0	1.44951e+08	0.003	0.02272	1.9456	2	1077.53	-2.71432	22.8108	1
	High	EEYPDRImNTFSVVPSPK	1	24	2	P68371;A0A384NYT8	M8(Oxidation)	0	1.06759e+07	0.009	0.1025	2.68259	3	2125.02	-3.67293	73.0073	1
P0DMV9	Heat shock 70 kDa protein 1B OS=Homo sapiens OX=9606 GN=HSPA1B PE=1 SV=1 - [HS71B_HUMAN]	162.087	50.86	18	26	28	60	1.0023e+09	641	70.009	5.65576
	A2	Sequence	# PSMs	# Proteins	# Protein Groups	Protein Group Accessions	Modifications	ΔCn	Area	q-Value	PEP	XCorr	Charge	MH+ [Da]	ΔM [ppm]	RT [min]	# Missed Cleavages
	High	RKELEQVcNPIISGLYQGAGGPGPGGFGAQGPK	2	14	1	P0DMV9	C8(Carbamidomethyl)	0	9.12112e+07	0	9.69e-09	6.07314	3	3339.68	-2.24236	83.8277	2
	High	AAAIGIDLGTTYScVGVFQHGK	2	15	1	P0DMV9	C14(Carbamidomethyl)	0	1.14078e+08	0	2.179e-06	4.53461	2	2265.13	-2.89993	89.0849	0
	High	KFGDPVVQSDmKHWPFQVINDGDKPK	3	5	1	P0DMV9	M11(Oxidation)	0	1.63109e+08	0	0.0001394	4.45635	3	3028.48	-6.95797	66.508	2
	High	HWPFQVINDGDKPK	3	8	1	P0DMV9		0	390473424	0	2.701e-05	4.3255	3	1680.84	-2.68886	55.5993	0
	High	NQVALNPQNTVFDAK	3	9	1	P0DMV9		0	5.58881e+08	0	0.0001394	3.99137	2	1658.85	-1.73732	65.7955	0
	High	AFYPEEISSmVLTK	2	15	1	P0DMV9	M10(Oxidation)	0	1.24847e+08	0	0.0001394	3.72041	3	1630.8	-2.11947	84.1273	0
	High	IINEPTAAAIAYGLDR	4	16	1	P0DMV9		0	7.67122e+08	0	7.867e-05	3.64629	3	1687.9	-2.0125	85.0796	0
	High	NQVALNPQNTVFDAKR	2	9	1	P0DMV9		0	6.6717e+07	0	0.0001341	3.60277	2	1814.94	-3.36184	54.336	1
	High	ATAGDTHLGGEDFDNR	2	28	1	P0DMV9		0	7.29594e+08	0	0.0001394	3.58467	3	1675.73	-2.66143	37.0513	0
	High	DAGVIAGLNVLR	2	17	1	P0DMV9		0	7.50106e+08	0	0.0001394	3.42946	2	1197.69	-2.10306	91.2431	0
	High	VLDKcQEVISWLDANTLAEKDEFEHK	2	15	1	P0DMV9	C5(Carbamidomethyl)	0	4.56481e+07	0	0.003268	3.28942	4	3117.51	-3.20028	91.8449	2
	High	LDKAQIHDLVLVGGSTR	3	13	1	P0DMV9		0	3.22221e+08	0	9.523e-07	3.25079	2	1822.01	-2.46531	59.4992	1
	High	EIAEAYLGYPVTNAVITVPAYFNDSQR	1	8	1	P0DMV9		0	3.07576e+07	0	0.0002759	3.15025	3	3001.49	-0.238839	101.721	0
	High	AQIHDLVLVGGSTR	3	13	1	P0DMV9		0	3.42746e+08	0	0.0001394	3.10073	2	1465.81	-2.4423	54.3343	0
	High	ARFEELcSDLFR	3	20	1	P0DMV9	C7(Carbamidomethyl)	0	2.00203e+08	0	0.0001394	2.94351	3	1542.73	-2.75751	74.1224	1
	High	LVNHFVEEFKR	4	14	1	P0DMV9		0	4.80725e+08	0	0.0008147	2.64933	3	1417.76	-2.08064	43.7843	1
	High	cQEVISWLDANTLAEKDEFEHK	1	15	1	P0DMV9	C1(Carbamidomethyl)	0	2.80116e+07	0	0.0001394	2.61868	4	2662.24	-2.00669	87.7844	1
	High	TTPSYVAFTDTER	3	39	2	P0DMV9;P11142		0	1411624908	0	0.000561	2.61715	2	1487.7	-1.78484	59.4111	0
	High	NALESYAFNmK	3	21	1	P0DMV9	M10(Oxidation)	0	4.89452e+08	0	0.001064	2.54044	2	1303.6	-2.21963	55.2763	0
	High	mVQEAEKYKAEDEVQR	1	14	1	P0DMV9	M1(Oxidation)	0	3.14531e+07	0	0.002565	2.53125	3	1968.93	-2.67895	26.4202	2
	High	FGDPVVQSDmKHWPFQVINDGDKPK	2	5	1	P0DMV9	M10(Oxidation)	0	1.28124e+08	0	0.0001394	2.27116	5	2900.4	-2.68721	73.2824	1
	High	VEIIANDQGNR	2	43	3	P0DMV9;V9HWB4;P11142		0	828156269	0	0.0001394	2.11843	2	1228.62	-2.58482	34.5013	0
	High	FEELcSDLFR	1	20	1	P0DMV9	C5(Carbamidomethyl)	0	4.26526e+07	0	0.002346	1.95082	2	1315.6	-2.48459	81.6587	0
	High	LVNHFVEEFK	2	14	1	P0DMV9		0	1.69243e+08	0.001	0.004879	2.53437	3	1261.65	-3.10001	51.8428	0
	High	LLQDFFNGR	1	15	1	P0DMV9		0	484966051	0.001	0.006168	1.91451	2	1109.57	-2.94444	77.4722	0
	High	VQVSYKGETK	1	4	1	P0DMV9		0	2.05092e+08	0.002	0.009402	2.16029	2	1138.61	-3.34478	22.769	1
	High	FGDPVVQSDmK	1	8	1	P0DMV9	M10(Oxidation)	0	4.44525e+07	0.002	0.008939	2.06866	2	1238.57	-2.79606	39.3556	0
	High	LSKEEIER	1	21	1	P0DMV9		0	2.37244e+07	0.003	0.02114	2.03717	2	1003.54	-2.2948	22.5252	1
P68371	Tubulin beta-4B chain OS=Homo sapiens OX=9606 GN=TUBB4B PE=1 SV=1 - [TBB4B_HUMAN]	152.046	58.65	47	4	22	59	7.09223e+08	445	49.799	4.89404
	A2	Sequence	# PSMs	# Proteins	# Protein Groups	Protein Group Accessions	Modifications	ΔCn	Area	q-Value	PEP	XCorr	Charge	MH+ [Da]	ΔM [ppm]	RT [min]	# Missed Cleavages
	High	FWEVISDEHGIDPTGTYHGDSDLQLER	2	16	1	P68371		0	1.43869e+08	0	8.291e-06	5.30175	3	3116.42	-1.8045	92.3909	0
	High	SGPFGQIFRPDNFVFGQSGAGNNWAK	2	28	2	A0A384NYT8;P68371		0	5.52263e+08	0	6.54e-05	4.69052	3	2798.34	-1.23298	99.7351	0
	High	GHYTEGAELVDSVLDVVRK	3	28	2	A0A384NYT8;P68371		0	5.27719e+08	0	2.432e-07	4.53769	2	2087.07	-1.94042	91.3756	1
	High	LHFFmPGFAPLTSR	6	42	2	A0A384NYT8;P68371	M5(Oxidation)	0	9.08286e+08	0	0.0001394	3.87934	3	1636.83	-1.81907	84.0838	0
	High	mSmKEVDEQmLNVQNK	3	30	2	A0A384NYT8;P68371	M1(Oxidation); M3(Oxidation); M10(Oxidation)	0	1.20861e+08	0	0.0001394	3.71486	3	1971.88	-3.23029	30.3415	1
	High	EIVHLQAGQcGNQIGAK	3	38	2	P68371;A0A384NYT8	C10(Carbamidomethyl)	0	1.51656e+08	0	6.604e-06	3.54828	3	1822.92	-2.70028	43.9967	0
	High	LTTPTYGDLNHLVSATmSGVTTcLR	3	31	2	A0A384NYT8;P68371	M17(Oxidation); C23(Carbamidomethyl)	0	1.35787e+08	0	0.0001394	3.39132	2	2724.34	1.81771	97.8003	0
	High	GHYTEGAELVDSVLDVVR	2	28	2	A0A384NYT8;P68371		0	2.51302e+08	0	4.511e-07	3.27311	2	1958.98	-1.00833	99.4102	0
	High	EVDEQmLNVQNK	1	31	2	A0A384NYT8;P68371	M6(Oxidation)	0	1.17696e+08	0	0.001067	3.15693	2	1462.68	-2.87485	36.5784	0
	High	LAVNmVPFPR	5	49	3	A0A384NYT8;P68371;Q9H4B7	M5(Oxidation)	0	389505133	0	0.0001394	3.13001	2	1159.63	-3.34806	68.2098	0
	High	ImNTFSVVPSPK	2	29	2	P68371;A0A384NYT8	M2(Oxidation)	0	6.47751e+08	0	0.0001394	3.1251	2	1335.69	-2.16702	61.3767	0
	High	LHFFMPGFAPLTSR	1	42	2	A0A384NYT8;P68371		0	5907625	0	0.0001394	3.12217	3	1620.83	-0.643777	96.3622	0
	High	ALTVPELTQQmFDAK	2	17	1	P68371	M11(Oxidation)	0	47388186	0	0.0001394	3.03694	2	1707.86	-1.89121	80.6782	0
	High	NSSYFVEWIPNNVK	3	43	2	A0A384NYT8;P68371		0	5.71632e+08	0	8.714e-05	3.00919	2	1696.83	-1.69468	92.4946	0
	High	AVLVDLEPGTmDSVR	2	18	1	P68371	M11(Oxidation)	0	1.75833e+08	0	2.528e-05	2.64655	2	1617.81	-1.88084	72.7963	0
	High	TAVcDIPPR	6	38	2	A0A384NYT8;P68371	C4(Carbamidomethyl)	0	2.34114e+07	0	0.0001502	2.54934	2	1028.52	-2.78869	36.4294	0
	High	FPGQLNADLRK	4	55	3	A0A384NYT8;P68371;Q9H4B7		0	215824944	0	0.0002644	2.17856	2	1258.69	-2.1957	44.8237	1
	High	IREEYPDRImNTFSVVPSPK	3	17	2	P68371;A0A384NYT8	M10(Oxidation)	0	408561538	0	0.0001394	1.95047	3	2394.21	-1.96373	65.5587	2
	High	INVYYNEATGGK	1	6	1	P68371		0	1.66597e+08	0	0.0001394	1.94262	2	1328.64	-2.49752	44.3232	0
	High	FPGQLNADLR	2	55	3	A0A384NYT8;P68371;Q9H4B7		0	222494976	0	0.0005087	1.93176	2	1130.59	-2.66103	60.2132	0
	High	RISEQFTAmFR	1	38	2	A0A384NYT8;P68371	M9(Oxidation)	0	12568891	0.002	0.007069	1.94351	3	1401.69	-3.14636	48.8875	1
	High	IREEYPDR	1	35	3	A0A384NYT8;P68371;Q9H4B7		0	1.44951e+08	0.003	0.02272	1.9456	2	1077.53	-2.71432	22.8108	1
	High	EEYPDRImNTFSVVPSPK	1	24	2	P68371;A0A384NYT8	M8(Oxidation)	0	1.06759e+07	0.009	0.1025	2.68259	3	2125.02	-3.67293	73.0073	1
Q01804	OTU domain-containing protein 4 OS=Homo sapiens OX=9606 GN=OTUD4 PE=1 SV=4 - [OTUD4_HUMAN]	150.424	40.66	3	19	36	53	5.54624e+08	1114	123.968	6.7124
	A2	Sequence	# PSMs	# Proteins	# Protein Groups	Protein Group Accessions	Modifications	ΔCn	Area	q-Value	PEP	XCorr	Charge	MH+ [Da]	ΔM [ppm]	RT [min]	# Missed Cleavages
	High	RPEPSTLENITDDKYATVSSPSK	1	1	1	Q01804		0	5.37887e+07	0	3.841e-09	5.39351	3	2535.25	-2.37624	55.3618	1
	High	GEHVHSLPEASVSSKPDEGR	2	2	1	Q01804		0	1.03619e+08	0	2.125e-05	4.93191	2	2118.02	-2.69254	27.4924	0
	High	TAAAAADVNGFKPLSGNEQLK	3	1	1	Q01804		0	1.96354e+08	0	1.307e-08	4.87296	2	2102.08	-3.05643	60.3173	0
	High	FLNADVQGIHSENGPVLVEELGKK	2	2	2	Q01804;D6RI06		0	3.44704e+08	0	2.918e-06	4.86982	3	2593.35	-3.348	78.6576	1
	High	DFIIYREPNVSPSQVTENNFPEK	2	3	2	Q01804;D6RI06		0	260428161	0	7.784e-07	4.85611	3	2723.32	-2.67819	88.3372	1
	High	GEHVHSLPEASVSSKPDEGRTEQSSQTR	2	2	1	Q01804		0	3.22642e+08	0	0.0001032	4.20951	4	3035.44	-1.73068	27.1851	1
	High	KADTALASIPPVAEGK	3	1	1	Q01804		0	4.84392e+08	0	3.615e-05	4.13924	2	1567.87	-1.96248	53.7086	1
	High	FLNADVQGIHSENGPVLVEELGK	2	2	2	Q01804;D6RI06		0	3.88011e+08	0	4.945e-06	4.13796	2	2465.26	-2.30365	89.443	0
	High	mKKPSTSGQNFHSDVDYRGPK	1	2	2	Q01804;D6RI06	M1(Oxidation)	0	1.44391e+08	0	0.0001394	3.85986	4	2395.14	-2.29325	25.3232	2
	High	AYScPmWAPHSYLYPLHQAYLAAcR	2	2	1	Q01804	C4(Carbamidomethyl); M6(Oxidation); C24(Carbamidomethyl)	0	2.66382e+07	0	0.0001394	3.7719	3	3042.38	-1.26503	84.5	0
	High	TAADVVSPGANSVDSR	1	1	1	Q01804		0	6.98527e+08	0	1.215e-05	3.65521	2	1545.75	-2.9268	41.4135	0
	High	KPSTSGQNFHSDVDYR	1	2	2	Q01804;D6RI06		0	8570750	0	0.0001058	3.57955	2	1837.85	-0.364871	26.4221	0
	High	NPSKPIKAPSALPPR	3	2	2	Q01804;D6RI06		0	1.88103e+07	0	0.0001394	3.3983	3	1572.92	-3.51081	30.9052	1
	High	KPSTSGQNFHSDVDYRGPK	1	2	2	Q01804;D6RI06		0	27918948	0	0.0001394	3.24325	3	2120	-5.1115	27.0885	1
	High	NLKAPPPESWNTVSGKK	1	2	2	Q01804;D6RI06		0	4.93821e+07	0	0.001179	3.16447	3	1852.99	-3.18911	37.9909	2
	High	DEQAFPALSSSSVNQSASQSSNPcVQR	1	1	1	Q01804	C24(Carbamidomethyl)	0	104676635	0	0.0001394	3.11404	3	2881.3	-2.02051	72.8895	0
	High	mKKPSTSGQNFHSDVDYR	2	2	2	Q01804;D6RI06	M1(Oxidation)	0	8.09841e+07	0	0.0001394	3.06808	2	2112.97	-1.13275	24.6483	1
	High	AHPPTQILNR	2	2	1	Q01804		0	2.37553e+08	0	0.0004901	3.02485	3	1146.64	-2.43047	29.4313	0
	High	DYSIAAGLQYEVGDK	2	2	2	Q01804;D6RI06		0	0	0	0.0001027	2.9648	2	1628.78	-2.16132	87.5444	0
	High	VLLcFSNGNHYDIVYPIK	2	3	2	Q01804;D6RI06	C4(Carbamidomethyl)	0	72365643	0	0.0002623	2.95597	2	2152.08	-2.71712	91.0585	0
	High	DcGSVSTVDEFPEAR	1	2	1	Q01804	C2(Carbamidomethyl)	0	9.14297e+07	0	2.422e-05	2.92207	2	1668.71	-3.8691	63.5633	0
	High	NLKAPPPESWNTVSGK	1	2	2	Q01804;D6RI06		0	2.49489e+07	0	0.0006116	2.79184	2	1724.89	-2.85239	47.3532	1
	High	EESSEDENEVSNILR	1	1	1	Q01804		0	8.11127e+06	0	0.0001197	2.74551	2	1749.78	-1.13333	64.9381	0
	High	NNGNSTSLPLSR	1	2	2	Q01804;D6RI06		0	1.35777e+08	0	0.0002292	2.53718	2	1259.63	-5.28445	36.6801	0
	High	FFFNLGVK	2	2	1	Q01804		0	2.41321e+08	0	0.0006351	2.49246	2	971.533	-2.32611	88.6744	0
	High	EDATPmDAYLR	1	1	1	Q01804	M6(Oxidation)	0	5.30419e+07	0	0.0004302	2.40013	2	1297.57	-1.90674	45.1406	0
	High	NVEYEIWLK	1	2	2	Q01804;D6RI06		0	2.74152e+08	0	0.0006593	2.32098	2	1193.62	-2.12798	78.3158	0
	High	AVAEQVLHSQSR	1	1	1	Q01804		0	3.23507e+08	0	0.0001394	2.11276	2	1324.69	-2.59254	28.5675	0
	High	AIVPPYSLcQTGEDLPK	1	2	1	Q01804	C9(Carbamidomethyl)	0	0	0	0.002626	1.68299	2	1887.95	-1.72418	82.8533	0
	High	KDFIIYREPNVSPSQVTENNFPEK	1	3	2	Q01804;D6RI06		0	9.79444e+07	0.001	0.007069	2.35206	4	2851.42	-1.72754	72.7188	2
	High	ERVEDFDHTSR	1	2	2	Q01804;D6RI06		0	7.14703e+07	0.001	0.007069	2.04506	2	1390.63	-2.422	24.061	1
	High	APSALPPR	1	2	2	Q01804;D6RI06		0	0	0.001	0.007069	1.97933	2	808.465	-2.91137	26.5832	0
	High	ERETVPVELEPKR	1	2	1	Q01804		0	2.1047e+08	0.002	0.00829	2.59806	3	1581.86	-2.50107	36.7905	2
	High	ESNYFGLSPEER	1	1	1	Q01804		0	4.80952e+08	0.002	0.01372	1.75719	2	1427.64	-2.19152	63.7524	0
	High	QFYNQTYGSR	1	1	1	Q01804		0	6.5371e+07	0.003	0.02193	1.5721	2	1263.57	-3.80599	35.9933	0
	High	LLYEIQNR	1	1	1	Q01804		0	432901195	0.004	0.03511	1.67685	2	1048.58	-2.50432	49.9089	0
Q9NYF8	Bcl-2-associated transcription factor 1 OS=Homo sapiens OX=9606 GN=BCLAF1 PE=1 SV=2 - [BCLF1_HUMAN]	141.876	31.96	10	3	36	66	1.24364e+09	920	106.059	9.979
	A2	Sequence	# PSMs	# Proteins	# Protein Groups	Protein Group Accessions	Modifications	ΔCn	Area	q-Value	PEP	XCorr	Charge	MH+ [Da]	ΔM [ppm]	RT [min]	# Missed Cleavages
	High	YFLHDDRDDGVDYWAK	3	3	1	Q9NYF8		0	455423954	0	0.0001394	3.90936	2	2014.89	-2.69517	66.4511	1
	High	FNDSEGDDTEETEDYR	1	7	2	Q9NYF8;E9PK91		0	2.27543e+07	0	5.083e-05	3.90914	2	1921.72	-2.06529	41.3846	0
	High	DTFEHDPSESIDEFNK	1	8	2	Q9NYF8;E9PK91		0	38901526	0	0.0001401	3.87385	3	1909.8	-2.70149	64.1559	0
	High	LKETGYVVERPSTTK	2	7	2	Q9NYF8;E9PK91		0	5.72777e+08	0	0.0001394	3.69079	2	1707.92	-3.49129	28.8525	1
	High	RPKEEEWDPEYTPK	2	3	1	Q9NYF8		0	6.77505e+08	0	0.0001394	3.64733	3	1803.85	-3.14052	35.5392	1
	High	YQGDGIVEDEEETmENNEEK	1	6	2	Q9NYF8;E9PK91	M14(Oxidation)	0	1.10033e+07	0	0.0001394	3.61802	3	2373.95	0.312622	50.9925	0
	High	YQGDGIVEDEEETmENNEEKKDR	2	6	2	Q9NYF8;E9PK91	M14(Oxidation)	0	9.9178e+07	0	0.0001394	3.58605	4	2773.17	-1.41625	38.3547	2
	High	mAPVPLDDSNRPASLTK	2	8	2	Q9NYF8;E9PK91	M1(Oxidation)	0	680448523	0	0.0001502	3.23616	2	1827.92	-2.12427	49.3017	0
	High	SQEEPKDTFEHDPSESIDEFNK	2	8	2	Q9NYF8;E9PK91		0	4.57556e+08	0	0.0006251	3.22661	3	2608.12	-2.86845	57.4895	1
	High	KAEGEPQEESPLK	1	8	2	Q9NYF8;E9PK91		0	1.01819e+08	0	0.001511	3.18536	2	1441.71	-2.89596	25.9966	1
	High	mIASDSHRPEVK	2	8	2	Q9NYF8;E9PK91	M1(Oxidation)	0	8.05471e+08	0	0.0001394	3.02748	2	1385.68	-2.90321	21.0631	0
	High	IKmIASDSHRPEVK	3	8	2	Q9NYF8;E9PK91	M3(Oxidation)	0	8.26618e+07	0	0.0001394	3.01183	2	1626.86	-2.82515	22.3211	1
	High	YQGDGIVEDEEETmENNEEKK	1	6	2	Q9NYF8;E9PK91	M14(Oxidation)	0	13654854	0	0.0001394	2.93024	3	2502.04	-3.53299	42.4191	1
	High	FNDSEGDDTEETEDYRQFR	1	7	2	Q9NYF8;E9PK91		0	1.95222e+07	0	0.001987	2.9127	3	2352.94	-1.78375	51.2915	1
	High	GRAEGEWEDQEALDYFSDKESGK	1	7	2	Q9NYF8;E9PK91		0	7.22006e+07	0	0.0001394	2.90875	4	2646.15	-2.15717	69.0018	2
	High	LKDLFDYSPPLHK	5	7	2	Q9NYF8;E9PK91		0	3.76287e+08	0	0.0001394	2.86021	2	1572.84	-1.95471	63.9906	1
	High	ETGYVVERPSTTKDK	1	7	2	Q9NYF8;E9PK91		0	1.88343e+07	0	0.0001394	2.85246	2	1709.87	-3.13557	25.2237	1
	High	STSESFIQHIVSLVHHVK	4	8	2	Q9NYF8;E9PK91		0	8.2893e+08	0	0.0001394	2.70723	3	2048.09	-2.19059	85.7441	0
	High	SIFDHIKLPQASK	3	8	2	Q9NYF8;E9PK91		0	7.82148e+08	0	0.0001453	2.68244	2	1483.82	-2.28426	65.8606	1
	High	ETGYVVERPSTTK	2	7	2	Q9NYF8;E9PK91		0	2.73389e+08	0	0.001094	2.6634	2	1466.74	-3.75779	28.5691	0
	High	EEEWDPEYTPK	2	5	2	Q9NYF8;Q9Y2W1		0	3.3752e+08	0	0.0001529	2.63054	2	1422.6	-1.64206	56.2459	0
	High	DRLLASTLVHSVKK	2	8	2	Q9NYF8;E9PK91		0	274730948	0	0.0001397	2.56956	3	1566.93	-1.37606	41.2021	2
	High	LLASTLVHSVKK	2	8	2	Q9NYF8;E9PK91		0	1011887860	0	0.0002333	2.106	2	1295.8	0.103255	37.5118	1
	High	LLASTLVHSVK	3	8	2	Q9NYF8;E9PK91		0	7.60547e+08	0	0.001795	1.82361	2	1167.71	-2.49948	48.1029	0
	High	LKmAPVPLDDSNRPASLTK	1	8	2	Q9NYF8;E9PK91	M3(Oxidation)	0	2.92588e+08	0.001	0.007069	3.38731	3	2069.1	-2.30768	46.3547	1
	High	KYFLHDDRDDGVDYWAK	2	3	1	Q9NYF8		0	205615202	0.001	0.00528	2.60262	4	2142.98	-1.97666	56.0255	2
	High	RIDISPSTLRK	1	6	2	Q9NYF8;E9PK91		0	9.39632e+07	0.001	0.00414	2.24548	3	1285.76	-2.36545	33.5281	2
	High	SSFYPDGGDQETAK	3	9	2	Q9NYF8;E9PK91		0	1.48398e+09	0.001	0.004612	2.05848	2	1501.64	-2.51248	40.0045	0
	High	DRLLASTLVHSVK	1	8	2	Q9NYF8;E9PK91		0	1.89713e+07	0.001	0.007069	2.00125	4	1438.84	-1.2963	50.5675	1
	High	LKETGYVVERPSTTKDK	1	7	2	Q9NYF8;E9PK91		0	125300065	0.002	0.00805	2.59488	4	1951.04	-2.49244	25.9776	2
	High	VFLLDR	2	8	2	Q9NYF8;E9PK91		0	1235049485	0.002	0.009314	2.39655	2	762.449	-2.29133	59.7245	0
	High	STFREESPLR	1	8	2	Q9NYF8;E9PK91		0	2.24035e+08	0.002	0.007069	2.28418	3	1221.62	-2.56794	31.5957	1
	High	AEGEPQEESPLK	1	8	2	Q9NYF8;E9PK91		0	1.05021e+07	0.002	0.01078	2.24548	2	1313.62	-2.1567	34.0191	0
	High	SIFDHIK	1	8	2	Q9NYF8;E9PK91		0	7.69657e+08	0.002	0.007819	2.19668	2	859.466	-1.4792	43.1588	0
	High	NTEEEGLKYK	2	7	2	Q9NYF8;E9PK91		0	735819373	0.003	0.01864	1.20776	3	1210.59	-1.32401	23.8278	1
	High	VFLLDRGNTR	1	7	2	Q9NYF8;E9PK91		0	5.379e+06	0.008	0.09433	1.23135	3	1190.66	-2.09723	43.8358	1
Q1KMD3	Heterogeneous nuclear ribonucleoprotein U-like protein 2 OS=Homo sapiens OX=9606 GN=HNRNPUL2 PE=1 SV=1 - [HNRL2_HUMAN]	137.335	49.26	2	32	32	49	3.31428e+08	747	85.0522	4.90674
	A2	Sequence	# PSMs	# Proteins	# Protein Groups	Protein Group Accessions	Modifications	ΔCn	Area	q-Value	PEP	XCorr	Charge	MH+ [Da]	ΔM [ppm]	RT [min]	# Missed Cleavages
	High	ANFSLPEKcDYmDEVTYGELEKEEAQPIVTK	2	2	1	Q1KMD3	C9(Carbamidomethyl); M12(Oxidation)	0	5.17757e+07	0	0.0001394	4.72741	4	3649.68	-4.09551	84.4747	2
	High	VGWSVDFSRPQLGEDEFSYGFDGR	2	2	1	Q1KMD3		0	1.77486e+08	0	1.288e-08	4.58931	3	2750.25	-1.04202	99.6892	0
	High	YGGQPLFSEKFPTLWSGAR	2	2	1	Q1KMD3		0	1.93756e+08	0	0.0001394	4.17531	3	2141.08	-2.14978	93.9641	1
	High	DRYGGQPLFSEKFPTLWSGAR	1	2	1	Q1KMD3		0	1.14077e+08	0	0.0001394	4.11748	3	2412.2	-2.64949	89.9548	2
	High	DLLVQQASQcLSK	1	2	1	Q1KMD3	C10(Carbamidomethyl)	0	1.80716e+08	0	2.976e-05	4.08681	2	1489.77	-1.62091	70.1555	0
	High	NcVVELNFGQKEEPFFPPPEEFVFIHAVPVEER	1	2	1	Q1KMD3	C2(Carbamidomethyl)	0	0	0	0.0001394	4.03822	4	3929.92	-0.775567	100.801	1
	High	VTQNLPmKEGcTEVSLLR	1	2	1	Q1KMD3	M7(Oxidation); C11(Carbamidomethyl)	0	1.71018e+08	0	7.746e-05	4.01275	3	2091.05	-2.50215	56.1402	1
	High	SRDLLVQQASQcLSK	2	2	1	Q1KMD3	C12(Carbamidomethyl)	0	156243245	0	0.0001394	4.01039	2	1732.9	-2.99711	51.4815	1
	High	LQEALDAEmLEDEAGGGGAGPGGAcK	2	2	1	Q1KMD3	M9(Oxidation); C25(Carbamidomethyl)	0	3.93328e+07	0	2.81e-06	3.85473	3	2519.1	-2.13058	73.6604	0
	High	NFILDQcNVYNSGQR	1	2	1	Q1KMD3	C7(Carbamidomethyl)	0	1.35831e+08	0	6.72e-05	3.78411	2	1827.84	-0.61715	69.9654	0
	High	NGEDLGVAFWISK	3	2	1	Q1KMD3		0	2.42691e+08	0	0.0001394	3.74861	2	1435.72	-1.75347	98.0781	0
	High	KEVEGDDVPESImLEmK	3	2	1	Q1KMD3	M13(Oxidation); M16(Oxidation)	0	4.3641e+07	0	0.0001038	3.4647	2	1980.91	-3.47676	54.4359	1
	High	KVVVVVPNEEDWKK	2	2	1	Q1KMD3		0	3.65787e+08	0	0.0001394	3.46379	3	1668.93	-2.32878	47.7645	2
	High	YNVLGAETVLNQmR	1	2	1	Q1KMD3	M13(Oxidation)	0	4.64532e+07	0	0.0003129	3.02671	3	1623.81	-1.52455	73.9709	0
	High	DWQSYYYHHPQDR	2	1	1	Q1KMD3		0	4.1744e+07	0	0.0001394	3.02007	2	1794.76	-1.10656	43.8091	0
	High	RNFILDQcNVYNSGQR	1	1	1	Q1KMD3	C8(Carbamidomethyl)	0	1.11407e+07	0	0.0001394	2.90355	3	1983.94	-1.98285	56.1217	1
	High	EVEGDDVPESImLEmK	4	2	1	Q1KMD3	M12(Oxidation); M15(Oxidation)	0	61001749	0	0.0001394	2.71925	2	1852.81	-3.51985	67.3515	0
	High	SGDETPGSEVPGDKAAEEQGDDQDSEK	1	2	1	Q1KMD3		0	7.24613e+06	0	0.0001394	2.7057	3	2777.15	-1.84413	37.3351	1
	High	TIEEcEVILmVGLPGSGK	2	2	1	Q1KMD3	C5(Carbamidomethyl); M10(Oxidation)	0	4.00631e+07	0	0.0001394	2.66266	3	1947.97	-1.52071	96.0742	0
	High	FPTLWSGAR	1	2	1	Q1KMD3		0	3.43854e+08	0	0.0006385	2.4839	2	1034.54	-2.05004	71.5423	0
	High	NYYGYQGYR	1	1	1	Q1KMD3		0	2.84643e+08	0	0.0001955	2.36291	2	1183.51	-2.09845	39.0281	0
	High	mKGLEEPEmDPK	1	2	1	Q1KMD3	M1(Oxidation); M9(Oxidation)	0	1.18079e+08	0.001	0.006547	2.81172	2	1435.64	-2.54007	24.5215	1
	High	DRYGGQPLFSEK	2	2	1	Q1KMD3		0	1.32689e+08	0.001	0.004998	2.64688	2	1396.68	-2.37185	42.8305	1
	High	KLLPPSEKR	2	2	1	Q1KMD3		0	1.57836e+07	0.002	0.009491	2.44864	3	1067.66	-1.98316	21.8758	2
	High	AYYEFREEAYHSR	1	2	1	Q1KMD3		0	23045798	0.002	0.007069	2.31719	3	1720.77	-2.50894	37.4674	1
	High	ANFSLPEK	1	2	1	Q1KMD3		0	1.09627e+08	0.002	0.007622	2.05941	2	905.471	-1.73758	42.6808	0
	High	VVVVVPNEEDWK	1	2	1	Q1KMD3		0	1.83571e+07	0.002	0.007761	1.96195	2	1412.74	-2.91538	73.0926	0
	High	GLKVDLAQR	1	2	1	Q1KMD3		0	49157729	0.004	0.03008	2.26208	3	999.592	-2.75088	33.6639	1
	High	YGGQPLFSEK	1	2	1	Q1KMD3		0	1.646e+08	0.005	0.04904	2.26032	2	1125.55	-2.38472	45.2682	0
	High	ALLPHVLcK	1	2	1	Q1KMD3	C8(Carbamidomethyl)	0	1.0444e+08	0.005	0.05078	1.57055	3	1050.61	-2.9406	49.2064	0
	High	VVVVVPNEEDWKK	1	2	1	Q1KMD3		0	7.11448e+07	0.007	0.08012	2.00708	2	1540.83	-3.06867	58.5415	1
	High	LKVTELR	1	2	1	Q1KMD3		0	1.75158e+08	0.007	0.08312	1.49027	2	858.539	-2.57474	28.3205	1
P49916	DNA ligase 3 OS=Homo sapiens OX=9606 GN=LIG3 PE=1 SV=2 - [DNLI3_HUMAN]	133.391	44.5	8	36	36	49	2.66317e+08	1009	112.835	9.01221
	A2	Sequence	# PSMs	# Proteins	# Protein Groups	Protein Group Accessions	Modifications	ΔCn	Area	q-Value	PEP	XCorr	Charge	MH+ [Da]	ΔM [ppm]	RT [min]	# Missed Cleavages
	High	DKNPAAQQVSPEWIWAcIR	1	2	1	P49916	C17(Carbamidomethyl)	0	5.50544e+07	0	8.711e-07	5.54878	3	2269.12	0.576329	98.6977	1
	High	SLLTIQEVDEFLLR	2	4	1	P49916		0	6.82593e+07	0	2.818e-06	4.98653	3	1675.92	-2.17465	102.086	0
	High	KIEDLTELEGWEELEDNEKEQITQHIADLSSK	1	4	1	P49916		0	8.78452e+07	0	2.365e-05	4.78172	4	3769.82	-2.5196	99.9472	2
	High	LTKEDEQQQALQDIASR	2	4	1	P49916		0	3.37104e+08	0	2.045e-06	4.39941	2	1972.99	-1.32741	50.677	1
	High	DYLNEGAmADTADLVVLGAFYGQGSK	1	2	1	P49916	M8(Oxidation)	0	9.10588e+06	0	1.688e-05	3.93016	2	2721.27	-1.10542	102.164	0
	High	TGKPLPFGTLGVHK	2	2	1	P49916		0	7.80592e+07	0	1.948e-05	3.92866	3	1451.83	-1.68337	44.1035	0
	High	LcAmVADNPSYNTK	1	4	1	P49916	C2(Carbamidomethyl); M4(Oxidation)	0	2.76947e+07	0	2.297e-05	3.8356	2	1599.71	-1.48821	40.7843	0
	High	FSGFSAKPNNSGEAPSSPTPK	1	4	1	P49916		0	0	0	0.0001254	3.81547	3	2107	-2.13501	42.2891	0
	High	DLEQGDVSETIR	1	4	1	P49916		0	2.70766e+08	0	0.0001394	3.73649	2	1361.65	-2.71651	53.8248	0
	High	YFVAFDGDLVQEFDmTSATHVLGSR	1	2	1	P49916	M15(Oxidation)	0	1.06693e+07	0	0.0001394	3.56488	3	2821.31	-2.71107	100.624	0
	High	HVLDALDPNAYEAFK	2	4	1	P49916		0	1.43664e+08	0	1.164e-05	3.49262	2	1702.84	-2.81212	85.2563	0
	High	VLHNAQEVEKEPGQR	2	3	1	P49916		0	134593199	0	0.0001394	2.9824	3	1733.89	-1.87882	23.9552	1
	High	ALSVQASLmTPVQPmLAEAcK	1	3	1	P49916	M9(Oxidation); M15(Oxidation); C20(Carbamidomethyl)	0	1.70155e+07	0	0.0001394	2.93015	2	2277.12	-3.17755	83.3598	0
	High	AAVWEITGAEFSK	1	2	1	P49916		0	1.58034e+08	0	0.0001394	2.91281	2	1408.71	-2.19499	83.1217	0
	High	VLLDIFTGVR	1	2	1	P49916		0	1.24517e+08	0	0.0001394	2.75144	2	1132.67	-0.968491	99.1366	0
	High	GSAGDGFHGDVYLTVK	1	4	1	P49916		0	8.71705e+06	0	0.0001394	2.73469	2	1622.78	-2.81401	56.6645	0
	High	VIQEGLEGLVLKDVK	2	2	1	P49916		0	7.28526e+07	0	0.0008565	2.65255	2	1639.96	-2.33985	79.2106	1
	High	LTTTGQVTSPVK	1	4	1	P49916		0	8.97858e+07	0	0.0003303	2.54135	2	1231.69	-3.00144	38.3072	0
	High	SEAHTADGISIR	1	2	1	P49916		0	7.41306e+07	0	0.0001394	2.50911	2	1256.62	-1.00237	28.1947	0
	High	IFNcNPDDmAR	1	4	1	P49916	C4(Carbamidomethyl); M9(Oxidation)	0	0	0	0.0001656	2.47703	2	1368.56	-2.03984	36.9938	0
	High	FLHDNmVEIPNR	4	3	1	P49916	M6(Oxidation)	0	7.30007e+07	0	0.0001941	2.35377	2	1500.72	-3.5512	48.2261	0
	High	TVYNLNDKQIVK	1	4	1	P49916		0	17254980	0	0.0001788	2.1688	2	1434.79	-2.08354	41.7622	1
	High	ALDLADmITR	1	2	1	P49916	M7(Oxidation)	0	6.9917e+07	0	0.002218	2.16752	2	1134.58	-1.68729	64.2875	0
	High	IYYPDFIVPDPK	1	3	1	P49916		0	1.59416e+08	0.001	0.004002	2.67648	2	1466.75	-2.16514	94.2471	0
	High	TQIIQDFLR	1	6	1	P49916		0	191081536	0.001	0.007069	2.00295	2	1133.63	-2.46435	79.1997	0
	High	KGSAGDGFHGDVYLTVK	1	4	1	P49916		0	0	0.002	0.007069	3.03028	3	1750.87	-4.53272	45.0846	1
	High	VLHNAQEVEKEPGQRR	3	3	1	P49916		0	4.81969e+07	0.002	0.009884	2.98072	2	1889.99	-2.74187	22.0992	2
	High	IYYPDFIVPDPKK	2	2	1	P49916		0	9.16841e+07	0.002	0.007387	2.69153	2	1594.85	-1.83772	78.8324	1
	High	TGKPLPFGTLGVHKK	1	2	1	P49916		0	1.22133e+07	0.002	0.007069	2.6158	2	1579.93	-2.7162	31.7162	1
	High	NLQDVVER	1	4	1	P49916		0	189644904	0.002	0.007069	2.32448	2	972.509	-2.27937	40.564	0
	High	SLKPVLPHK	2	2	1	P49916		0	1.11997e+08	0.002	0.007278	2.26727	3	1018.64	-2.46604	25.5711	0
	High	LQNELDmVK	1	2	1	P49916	M7(Oxidation)	0	6.97033e+07	0.002	0.007069	2.11426	2	1105.55	-2.55093	37.3092	0
	High	NGDHFSYFSR	1	3	1	P49916		0	5.70578e+07	0.002	0.01178	1.11558	2	1229.53	-2.63705	38.8225	0
	High	LYLPPSTPDFSR	1	2	1	P49916		0	176670623	0.003	0.01892	2.17385	2	1392.71	-2.61037	77.3069	0
	High	KAAVWEITGAEFSK	1	2	1	P49916		0	4.33817e+07	0.003	0.02376	1.9152	3	1536.8	-3.17208	65.7365	1
	High	LLLPGVIK	1	4	1	P49916		0	143148191	0.006	0.06251	1.89125	2	852.59	-1.82359	73.3696	0
P35527	Keratin, type I cytoskeletal 9 OS=Homo sapiens OX=9606 GN=KRT9 PE=1 SV=3 - [K1C9_HUMAN]	131.58	60.19	2	26	26	41	1.2827e+09	623	62.0268	5.23682
	A2	Sequence	# PSMs	# Proteins	# Protein Groups	Protein Group Accessions	Modifications	ΔCn	Area	q-Value	PEP	XCorr	Charge	MH+ [Da]	ΔM [ppm]	RT [min]	# Missed Cleavages
	High	LEKEIETYHNLLEGGQEDFESSGAGK	1	2	1	P35527		0	5.31995e+07	0	2.128e-08	6.20542	3	2880.35	-0.495206	74.9377	1
	High	HGVQELEIELQSQLSKK	4	2	1	P35527		0	6.23169e+08	0	1.033e-09	6.03099	3	1966.06	-1.73968	72.5818	1
	High	GGGGSFGYSYGGGSGGGFSASSLGGGFGGGSR	1	1	1	P35527		0	4.60536e+08	0	6.366e-07	5.66047	3	2705.15	-2.80637	86.8279	0
	High	EIETYHNLLEGGQEDFESSGAGK	1	2	1	P35527		0	1.27054e+09	0	4.935e-07	4.5225	3	2510.12	-3.13719	74.6395	0
	High	HGVQELEIELQSQLSK	6	2	1	P35527		0	726298248	0	6.994e-08	4.45611	2	1837.96	-1.4555	83.1631	0
	High	DIENQYETQITQIEHEVSSSGQEVQSSAK	1	2	1	P35527		0	571373705	0	0.0001394	4.268	3	3264.51	-1.74526	99.1764	0
	High	VQALEEANNDLENKIQDWYDKK	1	1	1	P35527		0	1.11944e+08	0	0.0001394	4.25843	3	2663.29	-1.72906	82.8515	2
	High	KDIENQYETQITQIEHEVSSSGQEVQSSAK	1	2	1	P35527		0	106936194	0	0.0001394	4.2072	4	3392.6	-1.62914	86.4096	1
	High	LASYLDKVQALEEANNDLENK	3	1	1	P35527		0	7.88925e+08	0	3.219e-06	4.12638	2	2377.18	-1.84075	84.2458	1
	High	GGSGGSHGGGSGFGGESGGSYGGGEEASGSGGGYGGGSGK	2	2	1	P35527		0	5.30747e+08	0	0.0001394	4.06478	4	3223.27	-2.98947	34.3242	0
	High	VQALEEANNDLENK	1	1	1	P35527		0	1.47562e+08	0	6.003e-06	4.04089	2	1586.76	-2.72956	47.5308	0
	High	IQDWYDKKGPAAIQK	1	1	1	P35527		0	6.72546e+06	0	0.0001394	3.88196	2	1760.93	-1.27067	40.3426	2
	High	YcGQLQmIQEQISNLEAQITDVR	1	2	1	P35527	C2(Carbamidomethyl); M7(Oxidation)	0	2.20369e+07	0	2.251e-05	3.88088	3	2753.32	-2.72733	102.162	0
	High	NHKEEmSQLTGQNSGDVNVEINVAPGKDLTK	2	2	1	P35527	M6(Oxidation)	0	1.01474e+08	0	0.0001544	3.87897	4	3368.62	-5.01016	56.1936	2
	High	SGGGGGGGLGSGGSIR	1	1	1	P35527		0	1.11554e+09	0	3.037e-07	3.81268	2	1232.59	-3.0241	26.2863	0
	High	NYSPYYNTIDDLKDQIVDLTVGNNK	1	1	1	P35527		0	1.04236e+08	0	0.0003793	2.89444	4	2902.4	-2.28773	100.881	1
	High	QGVDADINGLR	2	2	1	P35527		0	877862056	0	0.0002016	2.39922	2	1157.59	-2.7429	50.0378	0
	High	SDLEmQYETLQEELmALKK	1	2	1	P35527	M5(Oxidation); M15(Oxidation)	0	1.9759e+08	0	0.0001864	2.17842	3	2331.11	-1.68432	99.1623	1
	High	IKFEmEQNLR	1	2	1	P35527	M5(Oxidation)	0	164227900	0.001	0.006939	2.63026	3	1323.67	-2.21727	35.3746	1
	High	TLLDIDNTR	2	1	1	P35527		0	1462007611	0.001	0.004699	2.35382	2	1060.56	-2.49373	57.4197	0
	High	MTLDDFR	1	2	1	P35527		0	6.27013e+07	0.002	0.007069	1.818	2	897.411	-2.61963	57.5688	0
	High	STMQELNSR	1	1	1	P35527		0	6.56876e+06	0.002	0.007069	1.81519	2	1065.5	-2.23882	26.1649	0
	High	TLNDmRQEYEQLIAK	2	2	1	P35527	M5(Oxidation)	0	2.5957e+08	0.003	0.02107	2.45549	3	1867.92	-1.99703	59.0401	1
	High	IQDWYDK	1	1	1	P35527		0	51473334	0.003	0.02831	1.3357	2	967.45	-1.94373	39.2643	0
	High	QFSSSYLSR	1	1	1	P35527		0	8.87433e+07	0.006	0.06663	2.14042	2	1074.52	-1.87481	41.8748	0
	High	QVLDNLTmEK	1	2	1	P35527	M8(Oxidation)	0	274774937	0.006	0.0686	2.06439	2	1206.6	-2.90329	47.7283	0
A0A087WTT1	Polyadenylate-binding protein OS=Homo sapiens OX=9606 GN=PABPC1 PE=1 SV=1 - [A0A087WTT1_HUMAN]	127.917	53.26	34	20	28	46	8.38216e+08	522	58.4988	9.26123
	A2	Sequence	# PSMs	# Proteins	# Protein Groups	Protein Group Accessions	Modifications	ΔCn	Area	q-Value	PEP	XCorr	Charge	MH+ [Da]	ΔM [ppm]	RT [min]	# Missed Cleavages
	High	RSLGYAYVNFQQPADAER	2	17	2	A0A087WTT1;B1ANR0		0	1.57384e+08	0	1.164e-07	4.77524	2	2085.01	-1.73775	62.5839	1
	High	ITGmLLEIDNSELLHmLESPESLR	2	18	2	A0A087WTT1;B1ANR0	M4(Oxidation); M16(Oxidation)	0	2.9198e+08	0	1.807e-06	4.51941	3	2772.37	-2.11368	100.234	0
	High	SLGYAYVNFQQPADAER	4	17	2	A0A087WTT1;B1ANR0		0	4.40306e+08	0	3.262e-06	4.22889	2	1928.91	-2.23436	76.7733	0
	High	ALYDTFSAFGNILScK	2	14	2	A0A087WTT1;B1ANR0	C15(Carbamidomethyl)	0	1.03079e+08	0	1.524e-07	4.09698	2	1806.87	-1.32282	101.333	0
	High	GYGFVHFETQEAAER	2	11	1	A0A087WTT1		0	4.08315e+08	0	8.436e-06	3.94547	2	1740.79	-2.54528	58.008	0
	High	SKVDEAVAVLQAHQAK	5	14	1	A0A087WTT1		0	1.02214e+09	0	3.827e-05	3.90188	2	1693.92	-2.3639	49.263	1
	High	IVATKPLYVALAQR	3	13	1	A0A087WTT1		0	916585295	0	0.0001394	3.3382	3	1542.93	-2.69748	62.768	0
	High	ALDTmNFDVIK	1	17	2	A0A087WTT1;B1ANR0	M5(Oxidation)	0	4.65221e+08	0	0.0001825	3.31267	2	1282.63	-2.87315	69.1422	0
	High	LFPLIQAmHPTLAGK	3	12	1	A0A087WTT1	M8(Oxidation)	0	113251625	0	2.326e-05	3.29715	2	1652.92	-1.76468	72.6668	0
	High	KEFSPFGTITSAK	2	11	1	A0A087WTT1		0	221784039	0	0.001019	3.16859	2	1412.74	-1.95782	55.3963	1
	High	VDEAVAVLQAHQAK	1	15	1	A0A087WTT1		0	1.26406e+07	0	0.0001229	3.16822	2	1478.79	-2.0157	44.4818	0
	High	SKGFGFVcFSSPEEATK	1	23	2	A0A087WTT1;B1ANR0	C8(Carbamidomethyl)	0	3.05837e+07	0	9.766e-05	3.13081	2	1877.87	-2.84228	68.6764	1
	High	NLDDGIDDER	1	12	1	A0A087WTT1		0	1.49058e+08	0	0.0001394	3.0608	2	1161.5	-2.96222	37.9808	0
	High	GFGFVSFER	2	14	1	A0A087WTT1		0	4.07554e+08	0	0.000766	2.74558	2	1045.51	-1.78183	77.5891	0
	High	YQGVNLYVK	1	14	1	A0A087WTT1		0	5.07597e+08	0	0.0009206	2.6743	2	1083.58	-2.29162	51.4457	0
	High	SGVGNIFIK	1	14	1	A0A087WTT1		0	3.85825e+08	0	0.0002694	2.6417	2	934.534	-1.82781	56.2407	0
	High	KSGVGNIFIK	1	14	1	A0A087WTT1		0	1.09006e+07	0	0.0002023	2.61271	3	1062.63	-1.61947	37.5421	1
	High	QAHLTNQYmQR	1	10	1	A0A087WTT1	M9(Oxidation)	0	6.69686e+07	0	0.001575	2.42848	2	1405.66	-2.28364	22.3927	0
	High	NFGEDmDDERLK	1	13	1	A0A087WTT1	M6(Oxidation)	0	5.21821e+07	0	0.0001394	2.33662	2	1484.63	-1.7513	31.9829	1
	High	AKEFTNVYIK	1	15	2	A0A087WTT1;B1ANR0		0	350558794	0.001	0.005158	2.72958	2	1212.66	-2.86991	37.1802	1
	High	mNGmLLNDR	1	16	2	A0A087WTT1;B1ANR0	M1(Oxidation); M4(Oxidation)	0	14659349	0.001	0.007069	2.47614	2	1095.49	-1.64972	27.7536	0
	High	EFSPFGTITSAK	1	11	1	A0A087WTT1		0	3.53612e+08	0.001	0.004634	2.28853	2	1284.64	-2.34363	75.1105	0
	High	FSPAGPILSIR	2	19	1	A0A087WTT1		0	5.75918e+08	0.001	0.004955	1.2711	2	1157.66	-2.74943	76.8539	0
	High	AVNSATGVPTV	1	14	1	A0A087WTT1		0	2.12209e+08	0.002	0.007069	2.19155	2	1015.54	-2.74849	55.0705	0
	High	NLDDGIDDERLR	1	12	1	A0A087WTT1		0	1.26299e+08	0.002	0.01456	2.15986	2	1430.68	-2.49672	47.4471	1
	High	SKGFGFVSFER	1	14	1	A0A087WTT1		0	7.93118e+06	0.003	0.01902	2.06659	3	1260.63	-1.84032	59.604	1
	High	FGPALSVK	1	12	1	A0A087WTT1		0	4.41805e+08	0.003	0.02501	1.42323	2	818.475	-2.6258	48.473	0
	High	NFGEDmDDERLKDLFGK	1	12	1	A0A087WTT1	M6(Oxidation)	0	1.35458e+07	0.007	0.07753	2.136	2	2044.92	-2.7548	71.3678	2
E9PK91	Bcl-2-associated transcription factor 1 OS=Homo sapiens OX=9606 GN=BCLAF1 PE=1 SV=1 - [E9PK91_HUMAN]	122.752	32.03	10	1	33	59	1.24364e+09	871	100.346	9.94971
	A2	Sequence	# PSMs	# Proteins	# Protein Groups	Protein Group Accessions	Modifications	ΔCn	Area	q-Value	PEP	XCorr	Charge	MH+ [Da]	ΔM [ppm]	RT [min]	# Missed Cleavages
	High	GTFHDDRDDGVDYWAK	2	3	1	E9PK91		0	2.91199e+08	0	0.0001394	4.13525	3	1896.81	-3.29207	47.5673	1
	High	FNDSEGDDTEETEDYR	1	7	2	Q9NYF8;E9PK91		0	2.27543e+07	0	5.083e-05	3.90914	2	1921.72	-2.06529	41.3846	0
	High	DTFEHDPSESIDEFNK	1	8	2	Q9NYF8;E9PK91		0	38901526	0	0.0001401	3.87385	3	1909.8	-2.70149	64.1559	0
	High	LKETGYVVERPSTTK	2	7	2	Q9NYF8;E9PK91		0	5.72777e+08	0	0.0001394	3.69079	2	1707.92	-3.49129	28.8525	1
	High	YQGDGIVEDEEETmENNEEK	1	6	2	Q9NYF8;E9PK91	M14(Oxidation)	0	1.10033e+07	0	0.0001394	3.61802	3	2373.95	0.312622	50.9925	0
	High	YQGDGIVEDEEETmENNEEKKDR	2	6	2	Q9NYF8;E9PK91	M14(Oxidation)	0	9.9178e+07	0	0.0001394	3.58605	4	2773.17	-1.41625	38.3547	2
	High	mAPVPLDDSNRPASLTK	2	8	2	Q9NYF8;E9PK91	M1(Oxidation)	0	680448523	0	0.0001502	3.23616	2	1827.92	-2.12427	49.3017	0
	High	SQEEPKDTFEHDPSESIDEFNK	2	8	2	Q9NYF8;E9PK91		0	4.57556e+08	0	0.0006251	3.22661	3	2608.12	-2.86845	57.4895	1
	High	KAEGEPQEESPLK	1	8	2	Q9NYF8;E9PK91		0	1.01819e+08	0	0.001511	3.18536	2	1441.71	-2.89596	25.9966	1
	High	mIASDSHRPEVK	2	8	2	Q9NYF8;E9PK91	M1(Oxidation)	0	8.05471e+08	0	0.0001394	3.02748	2	1385.68	-2.90321	21.0631	0
	High	IKmIASDSHRPEVK	3	8	2	Q9NYF8;E9PK91	M3(Oxidation)	0	8.26618e+07	0	0.0001394	3.01183	2	1626.86	-2.82515	22.3211	1
	High	YQGDGIVEDEEETmENNEEKK	1	6	2	Q9NYF8;E9PK91	M14(Oxidation)	0	13654854	0	0.0001394	2.93024	3	2502.04	-3.53299	42.4191	1
	High	FNDSEGDDTEETEDYRQFR	1	7	2	Q9NYF8;E9PK91		0	1.95222e+07	0	0.001987	2.9127	3	2352.94	-1.78375	51.2915	1
	High	GRAEGEWEDQEALDYFSDKESGK	1	7	2	Q9NYF8;E9PK91		0	7.22006e+07	0	0.0001394	2.90875	4	2646.15	-2.15717	69.0018	2
	High	LKDLFDYSPPLHK	5	7	2	Q9NYF8;E9PK91		0	3.76287e+08	0	0.0001394	2.86021	2	1572.84	-1.95471	63.9906	1
	High	ETGYVVERPSTTKDK	1	7	2	Q9NYF8;E9PK91		0	1.88343e+07	0	0.0001394	2.85246	2	1709.87	-3.13557	25.2237	1
	High	STSESFIQHIVSLVHHVK	4	8	2	Q9NYF8;E9PK91		0	8.2893e+08	0	0.0001394	2.70723	3	2048.09	-2.19059	85.7441	0
	High	SIFDHIKLPQASK	3	8	2	Q9NYF8;E9PK91		0	7.82148e+08	0	0.0001453	2.68244	2	1483.82	-2.28426	65.8606	1
	High	ETGYVVERPSTTK	2	7	2	Q9NYF8;E9PK91		0	2.73389e+08	0	0.001094	2.6634	2	1466.74	-3.75779	28.5691	0
	High	DRLLASTLVHSVKK	2	8	2	Q9NYF8;E9PK91		0	274730948	0	0.0001397	2.56956	3	1566.93	-1.37606	41.2021	2
	High	LLASTLVHSVKK	2	8	2	Q9NYF8;E9PK91		0	1011887860	0	0.0002333	2.106	2	1295.8	0.103255	37.5118	1
	High	LLASTLVHSVK	3	8	2	Q9NYF8;E9PK91		0	7.60547e+08	0	0.001795	1.82361	2	1167.71	-2.49948	48.1029	0
	High	LKmAPVPLDDSNRPASLTK	1	8	2	Q9NYF8;E9PK91	M3(Oxidation)	0	2.92588e+08	0.001	0.007069	3.38731	3	2069.1	-2.30768	46.3547	1
	High	RIDISPSTLRK	1	6	2	Q9NYF8;E9PK91		0	9.39632e+07	0.001	0.00414	2.24548	3	1285.76	-2.36545	33.5281	2
	High	SSFYPDGGDQETAK	3	9	2	Q9NYF8;E9PK91		0	1.48398e+09	0.001	0.004612	2.05848	2	1501.64	-2.51248	40.0045	0
	High	DRLLASTLVHSVK	1	8	2	Q9NYF8;E9PK91		0	1.89713e+07	0.001	0.007069	2.00125	4	1438.84	-1.2963	50.5675	1
	High	LKETGYVVERPSTTKDK	1	7	2	Q9NYF8;E9PK91		0	125300065	0.002	0.00805	2.59488	4	1951.04	-2.49244	25.9776	2
	High	VFLLDR	2	8	2	Q9NYF8;E9PK91		0	1235049485	0.002	0.009314	2.39655	2	762.449	-2.29133	59.7245	0
	High	STFREESPLR	1	8	2	Q9NYF8;E9PK91		0	2.24035e+08	0.002	0.007069	2.28418	3	1221.62	-2.56794	31.5957	1
	High	AEGEPQEESPLK	1	8	2	Q9NYF8;E9PK91		0	1.05021e+07	0.002	0.01078	2.24548	2	1313.62	-2.1567	34.0191	0
	High	SIFDHIK	1	8	2	Q9NYF8;E9PK91		0	7.69657e+08	0.002	0.007819	2.19668	2	859.466	-1.4792	43.1588	0
	High	NTEEEGLKYK	2	7	2	Q9NYF8;E9PK91		0	735819373	0.003	0.01864	1.20776	3	1210.59	-1.32401	23.8278	1
	High	VFLLDRGNTR	1	7	2	Q9NYF8;E9PK91		0	5.379e+06	0.008	0.09433	1.23135	3	1190.66	-2.09723	43.8358	1
P11142	Heat shock cognate 71 kDa protein OS=Homo sapiens OX=9606 GN=HSPA8 PE=1 SV=1 - [HSP7C_HUMAN]	122.365	44.89	28	21	24	43	9.77947e+08	646	70.8542	5.51611
	A2	Sequence	# PSMs	# Proteins	# Protein Groups	Protein Group Accessions	Modifications	ΔCn	Area	q-Value	PEP	XCorr	Charge	MH+ [Da]	ΔM [ppm]	RT [min]	# Missed Cleavages
	High	LDKSQIHDIVLVGGSTR	3	10	1	P11142		0	2.7589e+08	0	3.72e-05	4.81253	3	1838.01	-2.93618	57.1967	1
	High	RFDDAVVQSDmKHWPFmVVNDAGRPK	2	14	1	P11142	M11(Oxidation); M17(Oxidation)	0	258819091	0	0.0001394	4.16535	4	3077.47	-2.18248	66.1444	2
	High	QTQTFTTYSDNQPGVLIQVYEGER	2	11	1	P11142		0	2.67335e+08	0	0.0001394	4.10047	3	2774.32	-1.84219	96.3568	0
	High	NQVAmNPTNTVFDAK	3	12	1	P11142	M5(Oxidation)	0	3.10984e+08	0	0.0001394	3.86398	2	1665.79	-2.47208	50.9577	0
	High	DAGTIAGLNVLR	2	15	1	P11142		0	4.7822e+08	0	0.0001394	3.83651	2	1199.67	-2.10955	81.7686	0
	High	SFYPEEVSSmVLTK	2	15	1	P11142	M10(Oxidation)	0	106782071	0	0.0001394	3.61379	3	1632.78	-2.61017	76.5648	0
	High	IINEPTAAAIAYGLDKK	2	11	1	P11142		0	6.9406e+08	0	1.561e-06	3.54878	2	1787.99	-0.602889	70.3961	1
	High	TVTNAVVTVPAYFNDSQR	3	12	1	P11142		0	3.17889e+08	0	2.777e-06	3.49602	3	1981.99	-2.50165	82.1993	0
	High	GPAVGIDLGTTYScVGVFQHGK	3	14	1	P11142	C14(Carbamidomethyl)	0	1.19835e+08	0	0.0001032	3.47463	2	2263.12	0.560635	85.7111	0
	High	NSLESYAFNmK	1	14	1	P11142	M10(Oxidation)	0	2.30795e+08	0	0.0001394	3.46873	2	1319.59	-1.6657	53.6708	0
	High	SINPDEAVAYGAAVQAAILSGDK	1	9	1	P11142		0	1.43264e+07	0	0.0001394	3.45465	3	2260.14	-1.87098	100.988	0
	High	ARFEELNADLFR	1	12	1	P11142		0	2.35898e+08	0	0.0001394	3.34591	2	1480.75	-1.27793	71.9096	1
	High	IINEPTAAAIAYGLDK	2	21	2	V9HWB4;P11142		0	9.69146e+07	0	0.0001202	3.27948	3	1659.89	-2.38616	83.0506	0
	High	NQVAmNPTNTVFDAKR	1	12	1	P11142	M5(Oxidation)	0	2.97168e+07	0	0.0001394	3.21015	2	1821.89	-3.29043	41.9853	1
	High	STAGDTHLGGEDFDNR	2	9	1	P11142		0	4.54243e+08	0	0.0001394	2.97978	2	1691.72	-3.98508	36.366	0
	High	SQIHDIVLVGGSTR	1	10	1	P11142		0	1.1109e+08	0	0.0001394	2.80073	2	1481.8	-2.11136	50.532	0
	High	TTPSYVAFTDTER	3	39	2	P0DMV9;P11142		0	1411624908	0	0.000561	2.61715	2	1487.7	-1.78484	59.4111	0
	High	mVNHFIAEFKR	1	9	1	P11142	M1(Oxidation)	0	5.45434e+07	0	0.0004262	2.56827	3	1407.72	-2.80922	38.4177	1
	High	VQVEYKGETK	1	16	1	P11142		0	1.71361e+08	0	0.001552	2.48583	2	1180.62	-2.35615	23.1668	1
	High	VEIIANDQGNR	2	43	3	P0DMV9;V9HWB4;P11142		0	828156269	0	0.0001394	2.11843	2	1228.62	-2.58482	34.5013	0
	High	RFDDAVVQSDmK	1	15	1	P11142	M11(Oxidation)	0	2.04187e+07	0.001	0.006981	2.83546	2	1426.66	-1.23487	31.9812	1
	High	LLQDFFNGK	2	18	1	P11142		0	2.09712e+08	0.001	0.007069	1.95996	2	1081.57	-1.96192	75.5254	0
	High	mVNHFIAEFK	1	9	1	P11142	M1(Oxidation)	0	55003889	0.002	0.01128	2.04555	3	1251.62	-1.58691	46.5102	0
	High	LSKEDIER	1	12	1	P11142		0	4.68465e+07	0.008	0.08991	1.95458	3	989.525	-1.45209	23.7995	1
F1T0I1	Protein transport protein sec16 OS=Homo sapiens OX=9606 GN=SEC16A PE=1 SV=1 - [F1T0I1_HUMAN]	121.799	29.99	9	1	38	48	2.67421e+08	2334	249.328	5.84619
	A2	Sequence	# PSMs	# Proteins	# Protein Groups	Protein Group Accessions	Modifications	ΔCn	Area	q-Value	PEP	XCorr	Charge	MH+ [Da]	ΔM [ppm]	RT [min]	# Missed Cleavages
	High	SPNEANLIDFTNEAVEQVEEEESGEAQLSFLTGGPAAAASSLER	1	7	3	F1T0I1;O15027;A4QN19		0	1.30289e+07	0	0.0001394	6.31538	5	4607.15	-1.10892	103.995	0
	High	SHNVAAGSYEAPLPPGSFHGDFAYGTYR	2	8	3	F1T0I1;O15027;A4QN19		0	1.02336e+08	0	2e-05	4.80602	3	2968.37	0.38126	74.4175	0
	High	TLENPVNVYNPSHSDSLASQQSVASHPR	2	5	2	F1T0I1;O15027		0	1.39381e+08	0	0.0001394	4.69422	3	3034.46	-1.65344	59.1494	0
	High	SILTQPHLYSPVLISQLVQmASQLR	1	8	3	F1T0I1;O15027;A4QN19	M20(Oxidation)	0	1.19278e+08	0	0.0001394	4.51818	3	2838.55	-1.84731	101.334	0
	High	QNGTVVGTDIAELLLR	2	7	3	F1T0I1;O15027;A4QN19		0	2.33749e+07	0	0.0001394	4.04005	3	1698.94	0.113927	100.992	0
	High	EKPEEESLAAPTWLVHLQQVER	2	8	3	F1T0I1;O15027;A4QN19		0	2.71761e+08	0	1.159e-05	3.9239	3	2589.33	-1.42072	86.9842	0
	High	SGRNDGLLALSSPDAEEPQLPDGTGR	1	5	1	F1T0I1		0	2.38519e+07	0	0.0002696	3.73856	3	2652.27	-4.26309	81.8621	1
	High	YRPYDGAASAYAQNYR	2	6	3	F1T0I1;O15027;A4QN19		0	1.67298e+08	0	0.0001394	3.6752	3	1865.85	-2.14277	46.212	0
	High	SPDPGIVPQEAPVGNSLSELSEENFDGK	1	9	3	F1T0I1;O15027;A4QN19		0	1.0881e+07	0	0.0001394	3.40532	3	2912.38	-1.43108	99.2285	0
	High	NQWVNLNEPEEEKKAPPPPPTSmPK	1	10	3	F1T0I1;O15027;A4QN19	M23(Oxidation)	0	1.61921e+07	0	0.003549	3.25269	3	2873.41	-2.39739	53.3394	2
	High	YRPYDGAASAYAQNYRYPEPERPSSR	1	6	3	F1T0I1;O15027;A4QN19		0	5.96842e+07	0	0.0001394	3.23446	4	3064.42	-2.34799	51.3728	1
	High	DDTHKVDVINFAQNK	3	7	3	F1T0I1;O15027;A4QN19		0	2.3372e+08	0	0.0001394	3.22624	2	1743.86	-1.87557	49.87	1
	High	TVQAAPPALPGPPGAPVNmYSR	2	12	3	F1T0I1;O15027;A4QN19	M19(Oxidation)	0	2.84299e+08	0	0.0001394	2.92519	3	2207.12	-1.58738	75.9895	0
	High	TmATmGDTLASR	1	8	3	F1T0I1;O15027;A4QN19	M2(Oxidation); M5(Oxidation)	0	1.32004e+08	0	0.0004862	2.773	2	1286.57	-2.00065	25.0493	0
	High	NEHRPASALVNPLAR	1	4	2	F1T0I1;O15027		0	4.13864e+07	0	0.0001394	2.73457	3	1644.89	-2.5377	39.8523	0
	High	YVDVLNPSGTQR	1	13	3	F1T0I1;O15027;A4QN19		0	2.28196e+08	0	0.0001394	2.72837	2	1348.68	-2.62988	52.3477	0
	High	AHASPFSGALTPSAPPGPEmNR	1	3	2	F1T0I1;O15027	M20(Oxidation)	0	81367166	0	0.003524	2.61524	3	2208.05	-1.91599	58.5721	0
	High	LVLIGSNHSLPFLK	1	8	3	F1T0I1;O15027;A4QN19		0	6.32177e+07	0	0.0001394	2.53586	2	1537.91	-2.41993	86.7695	0
	High	HGAVcHTGAPDATLHTVHPDSVSSSYSSR	1	6	3	F1T0I1;O15027;A4QN19	C5(Carbamidomethyl)	0	1.79701e+07	0	0.0001394	2.43865	5	3033.38	-2.17876	38.3385	0
	High	AQQELVPPQQQASPPQLPK	1	6	3	F1T0I1;O15027;A4QN19		0	7.11116e+06	0	0.000147	2.3635	2	2084.11	-0.467764	65.5478	0
	High	FATNEAIQR	1	8	3	F1T0I1;O15027;A4QN19		0	1.88396e+08	0	0.0003582	2.31188	2	1049.53	-2.75151	32.2308	0
	High	NGLWGHALLLASK	1	8	3	F1T0I1;O15027;A4QN19		0	5.41585e+07	0	0.0003182	2.29878	2	1379.78	-2.56186	72.7435	0
	High	SSPPVLQGPAPAGFSQHPGLLVPHTHAR	1	3	2	F1T0I1;O15027		0	2.22664e+07	0	0.00131	2.11664	3	2855.5	-2.04405	64.4986	0
	High	LAEmGLATQAFHYcEAIAK	1	8	3	F1T0I1;O15027;A4QN19	M4(Oxidation); C14(Carbamidomethyl)	0	3.06201e+07	0	0.002046	1.89396	3	2140.01	-3.18148	74.6626	0
	High	KTEAYLPDDKNK	1	9	3	F1T0I1;O15027;A4QN19		0	2.36804e+07	0.001	0.004779	3.23235	2	1421.72	-2.8636	22.6226	2
	High	GLANPEPAPEPK	1	14	3	F1T0I1;O15027;A4QN19		0	2.46202e+08	0.001	0.007069	2.73632	2	1219.63	-3.23548	36.2702	0
	High	GGIGASENLENPPK	1	6	3	F1T0I1;O15027;A4QN19		0	3.82185e+07	0.001	0.005939	2.38331	2	1382.69	-1.69452	41.8993	0
	High	QGYPEGYYSSK	1	6	3	F1T0I1;O15027;A4QN19		0	6.41191e+07	0.002	0.007503	2.10266	2	1278.56	-2.92296	33.9969	0
	High	ADSGPTQPPLSLSPAPETK	2	9	3	F1T0I1;O15027;A4QN19		0	1.19562e+08	0.002	0.009865	2.0213	2	1892.96	-2.10729	66.9115	0
	High	HLLQEAR	1	9	3	F1T0I1;O15027;A4QN19		0	1.67599e+07	0.002	0.01094	1.83792	2	866.482	-2.7596	22.7501	0
	High	SGWSSQSDYYASYYSSQYDYGDPGHWDR	1	6	3	F1T0I1;O15027;A4QN19		0	46168214	0.003	0.01774	2.83785	3	3327.31	-3.47986	89.6603	0
	High	TEAYLPDDKNK	1	9	3	F1T0I1;O15027;A4QN19		0	1.93512e+07	0.003	0.02525	2.01157	2	1293.63	-2.95897	26.3433	1
	High	SHLVGVKPFEADR	1	6	3	F1T0I1;O15027;A4QN19		0	3.56913e+07	0.003	0.02739	1.91411	3	1454.77	-2.8892	36.3426	0
	High	TVPDSEAPPGWDR	2	9	3	F1T0I1;O15027;A4QN19		0	123684262	0.003	0.02527	1.62468	2	1426.66	-2.89071	52.4471	0
	High	WGDWRPHLAmVLSNLNNNmDVESR	1	8	3	F1T0I1;O15027;A4QN19	M10(Oxidation); M19(Oxidation)	0	1.75911e+07	0.004	0.03308	2.15961	4	2886.33	-3.19486	92.0026	0
	High	KGESWFFR	1	9	3	F1T0I1;O15027;A4QN19		0	9.24316e+07	0.004	0.03964	1.67418	2	1056.52	-2.44588	49.5864	1
	High	LLPSAPQTLPDGPLASPAR	1	8	3	F1T0I1;O15027;A4QN19		0	2.05062e+08	0.006	0.0667	2.0636	3	1901.05	-1.77838	84.8612	0
	High	FTGSFDDDPDPHRDPYGEEVDRR	1	8	3	F1T0I1;O15027;A4QN19		0	3.37898e+07	0.008	0.0912	2.22677	3	2722.17	-1.12235	50.2477	2
A0A384MEJ3	Epididymis secretory sperm binding protein OS=Homo sapiens OX=9606 PE=2 SV=1 - [A0A384MEJ3_HUMAN]	121.281	47.44	25	8	14	52	9.55763e+08	449	49.1984	6.30322
	A2	Sequence	# PSMs	# Proteins	# Protein Groups	Protein Group Accessions	Modifications	ΔCn	Area	q-Value	PEP	XCorr	Charge	MH+ [Da]	ΔM [ppm]	RT [min]	# Missed Cleavages
	High	STGEAFVQFASQEIAEK	4	11	2	P55795;A0A384MEJ3		0	1.21718e+09	0	5.451e-07	5.5124	3	1841.89	-2.73658	90.9045	0
	High	ATENDIYNFFSPLNPVR	1	10	2	A0A384MEJ3;B4DKS8		0	3.19737e+08	0	4.828e-06	5.1461	3	1996.97	-1.54762	101.035	0
	High	RGAYGGGYGGYDDYNGYNDGYGFGSDR	1	6	1	A0A384MEJ3		0	3.81745e+07	0	4.144e-06	4.58911	3	2873.14	-2.0899	67.6282	1
	High	GAYGGGYGGYDDYNGYNDGYGFGSDR	1	6	1	A0A384MEJ3		0	7.16532e+07	0	0.0001394	4.25366	3	2717.04	-2.66486	78.8341	0
	High	EGRPSGEAFVELESEDEVK	4	15	1	A0A384MEJ3		0	5.15962e+08	0	3.869e-05	4.0178	2	2106.98	-2.07986	63.5707	0
	High	VTGEADVEFATHEDAVAAmSK	16	8	1	A0A384MEJ3	M19(Oxidation)	0	1.23288e+08	0	0.00076	3.27127	3	2193.99	-1.58292	109.626	0
	High	YGDGGSTFQSTTGHcVHmR	2	9	1	A0A384MEJ3	C15(Carbamidomethyl); M18(Oxidation)	0	127781726	0	0.0001394	3.1771	3	2113.87	-3.18386	27.691	0
	High	SNNVEmDWVLK	2	16	1	A0A384MEJ3	M6(Oxidation)	0	1.1705e+08	0	0.001099	3.1078	2	1350.63	-2.42874	61.7586	0
	High	YVELFLNSTAGASGGAYEHR	5	3	1	A0A384MEJ3		0	2.28853e+08	0	0.0001501	2.79374	3	2142.02	-2.08554	72.2069	0
	High	HTGPNSPDTANDGFVR	3	17	2	P55795;A0A384MEJ3		0	8.09939e+08	0	0.0001394	2.62618	2	1684.76	-3.88746	32.8166	0
	High	GLPWScSADEVQR	2	18	1	A0A384MEJ3	C6(Carbamidomethyl)	0	3.5588e+08	0.001	0.007069	2.61701	2	1504.68	-2.18457	61.3264	0
	High	VHIEIGPDGR	7	13	3	P55795;A0A384MEJ3;B4DKS8		0	8.40169e+08	0.001	0.007069	1.38469	2	1092.58	-1.7252	39.4382	0
	High	LRGLPFGcSK	1	19	3	P31942;P55795;A0A384MEJ3	C8(Carbamidomethyl)	0	16870193	0.002	0.01145	2.35688	3	1134.61	-1.20591	43.0933	1
	High	DLNYcFSGmSDHR	3	10	2	P55795;A0A384MEJ3	C5(Carbamidomethyl); M9(Oxidation)	0	1.56085e+08	0.002	0.01233	0.801825	3	1617.64	-2.25539	46.6203	0
O15027	Protein transport protein Sec16A OS=Homo sapiens OX=9606 GN=SEC16A PE=1 SV=4 - [SC16A_HUMAN]	118.06	29.78	9	1	38	48	2.67421e+08	2357	251.738	5.79541
	A2	Sequence	# PSMs	# Proteins	# Protein Groups	Protein Group Accessions	Modifications	ΔCn	Area	q-Value	PEP	XCorr	Charge	MH+ [Da]	ΔM [ppm]	RT [min]	# Missed Cleavages
	High	SPNEANLIDFTNEAVEQVEEEESGEAQLSFLTGGPAAAASSLER	1	7	3	F1T0I1;O15027;A4QN19		0	1.30289e+07	0	0.0001394	6.31538	5	4607.15	-1.10892	103.995	0
	High	SHNVAAGSYEAPLPPGSFHGDFAYGTYR	2	8	3	F1T0I1;O15027;A4QN19		0	1.02336e+08	0	2e-05	4.80602	3	2968.37	0.38126	74.4175	0
	High	TLENPVNVYNPSHSDSLASQQSVASHPR	2	5	2	F1T0I1;O15027		0	1.39381e+08	0	0.0001394	4.69422	3	3034.46	-1.65344	59.1494	0
	High	SILTQPHLYSPVLISQLVQmASQLR	1	8	3	F1T0I1;O15027;A4QN19	M20(Oxidation)	0	1.19278e+08	0	0.0001394	4.51818	3	2838.55	-1.84731	101.334	0
	High	QNGTVVGTDIAELLLR	2	7	3	F1T0I1;O15027;A4QN19		0	2.33749e+07	0	0.0001394	4.04005	3	1698.94	0.113927	100.992	0
	High	EKPEEESLAAPTWLVHLQQVER	2	8	3	F1T0I1;O15027;A4QN19		0	2.71761e+08	0	1.159e-05	3.9239	3	2589.33	-1.42072	86.9842	0
	High	YRPYDGAASAYAQNYR	2	6	3	F1T0I1;O15027;A4QN19		0	1.67298e+08	0	0.0001394	3.6752	3	1865.85	-2.14277	46.212	0
	High	SPDPGIVPQEAPVGNSLSELSEENFDGK	1	9	3	F1T0I1;O15027;A4QN19		0	1.0881e+07	0	0.0001394	3.40532	3	2912.38	-1.43108	99.2285	0
	High	NQWVNLNEPEEEKKAPPPPPTSmPK	1	10	3	F1T0I1;O15027;A4QN19	M23(Oxidation)	0	1.61921e+07	0	0.003549	3.25269	3	2873.41	-2.39739	53.3394	2
	High	YRPYDGAASAYAQNYRYPEPERPSSR	1	6	3	F1T0I1;O15027;A4QN19		0	5.96842e+07	0	0.0001394	3.23446	4	3064.42	-2.34799	51.3728	1
	High	DDTHKVDVINFAQNK	3	7	3	F1T0I1;O15027;A4QN19		0	2.3372e+08	0	0.0001394	3.22624	2	1743.86	-1.87557	49.87	1
	High	TVQAAPPALPGPPGAPVNmYSR	2	12	3	F1T0I1;O15027;A4QN19	M19(Oxidation)	0	2.84299e+08	0	0.0001394	2.92519	3	2207.12	-1.58738	75.9895	0
	High	TmATmGDTLASR	1	8	3	F1T0I1;O15027;A4QN19	M2(Oxidation); M5(Oxidation)	0	1.32004e+08	0	0.0004862	2.773	2	1286.57	-2.00065	25.0493	0
	High	NEHRPASALVNPLAR	1	4	2	F1T0I1;O15027		0	4.13864e+07	0	0.0001394	2.73457	3	1644.89	-2.5377	39.8523	0
	High	YVDVLNPSGTQR	1	13	3	F1T0I1;O15027;A4QN19		0	2.28196e+08	0	0.0001394	2.72837	2	1348.68	-2.62988	52.3477	0
	High	AHASPFSGALTPSAPPGPEmNR	1	3	2	F1T0I1;O15027	M20(Oxidation)	0	81367166	0	0.003524	2.61524	3	2208.05	-1.91599	58.5721	0
	High	LVLIGSNHSLPFLK	1	8	3	F1T0I1;O15027;A4QN19		0	6.32177e+07	0	0.0001394	2.53586	2	1537.91	-2.41993	86.7695	0
	High	HGAVcHTGAPDATLHTVHPDSVSSSYSSR	1	6	3	F1T0I1;O15027;A4QN19	C5(Carbamidomethyl)	0	1.79701e+07	0	0.0001394	2.43865	5	3033.38	-2.17876	38.3385	0
	High	AQQELVPPQQQASPPQLPK	1	6	3	F1T0I1;O15027;A4QN19		0	7.11116e+06	0	0.000147	2.3635	2	2084.11	-0.467764	65.5478	0
	High	FATNEAIQR	1	8	3	F1T0I1;O15027;A4QN19		0	1.88396e+08	0	0.0003582	2.31188	2	1049.53	-2.75151	32.2308	0
	High	NGLWGHALLLASK	1	8	3	F1T0I1;O15027;A4QN19		0	5.41585e+07	0	0.0003182	2.29878	2	1379.78	-2.56186	72.7435	0
	High	SSPPVLQGPAPAGFSQHPGLLVPHTHAR	1	3	2	F1T0I1;O15027		0	2.22664e+07	0	0.00131	2.11664	3	2855.5	-2.04405	64.4986	0
	High	LAEmGLATQAFHYcEAIAK	1	8	3	F1T0I1;O15027;A4QN19	M4(Oxidation); C14(Carbamidomethyl)	0	3.06201e+07	0	0.002046	1.89396	3	2140.01	-3.18148	74.6626	0
	High	VLSSAASLPGSELPSSRPEGSQGGELSR	1	5	1	O15027		0	8.51647e+07	0	0.0003341	1.8683	3	2755.38	-1.9028	64.6896	0
	High	KTEAYLPDDKNK	1	9	3	F1T0I1;O15027;A4QN19		0	2.36804e+07	0.001	0.004779	3.23235	2	1421.72	-2.8636	22.6226	2
	High	GLANPEPAPEPK	1	14	3	F1T0I1;O15027;A4QN19		0	2.46202e+08	0.001	0.007069	2.73632	2	1219.63	-3.23548	36.2702	0
	High	GGIGASENLENPPK	1	6	3	F1T0I1;O15027;A4QN19		0	3.82185e+07	0.001	0.005939	2.38331	2	1382.69	-1.69452	41.8993	0
	High	QGYPEGYYSSK	1	6	3	F1T0I1;O15027;A4QN19		0	6.41191e+07	0.002	0.007503	2.10266	2	1278.56	-2.92296	33.9969	0
	High	ADSGPTQPPLSLSPAPETK	2	9	3	F1T0I1;O15027;A4QN19		0	1.19562e+08	0.002	0.009865	2.0213	2	1892.96	-2.10729	66.9115	0
	High	HLLQEAR	1	9	3	F1T0I1;O15027;A4QN19		0	1.67599e+07	0.002	0.01094	1.83792	2	866.482	-2.7596	22.7501	0
	High	SGWSSQSDYYASYYSSQYDYGDPGHWDR	1	6	3	F1T0I1;O15027;A4QN19		0	46168214	0.003	0.01774	2.83785	3	3327.31	-3.47986	89.6603	0
	High	TEAYLPDDKNK	1	9	3	F1T0I1;O15027;A4QN19		0	1.93512e+07	0.003	0.02525	2.01157	2	1293.63	-2.95897	26.3433	1
	High	SHLVGVKPFEADR	1	6	3	F1T0I1;O15027;A4QN19		0	3.56913e+07	0.003	0.02739	1.91411	3	1454.77	-2.8892	36.3426	0
	High	TVPDSEAPPGWDR	2	9	3	F1T0I1;O15027;A4QN19		0	123684262	0.003	0.02527	1.62468	2	1426.66	-2.89071	52.4471	0
	High	WGDWRPHLAmVLSNLNNNmDVESR	1	8	3	F1T0I1;O15027;A4QN19	M10(Oxidation); M19(Oxidation)	0	1.75911e+07	0.004	0.03308	2.15961	4	2886.33	-3.19486	92.0026	0
	High	KGESWFFR	1	9	3	F1T0I1;O15027;A4QN19		0	9.24316e+07	0.004	0.03964	1.67418	2	1056.52	-2.44588	49.5864	1
	High	LLPSAPQTLPDGPLASPAR	1	8	3	F1T0I1;O15027;A4QN19		0	2.05062e+08	0.006	0.0667	2.0636	3	1901.05	-1.77838	84.8612	0
	High	FTGSFDDDPDPHRDPYGEEVDRR	1	8	3	F1T0I1;O15027;A4QN19		0	3.37898e+07	0.008	0.0912	2.22677	3	2722.17	-1.12235	50.2477	2
P13645	Keratin, type I cytoskeletal 10 OS=Homo sapiens OX=9606 GN=KRT10 PE=1 SV=6 - [K1C10_HUMAN]	116.415	40.24	23	23	25	42	9.50916e+08	584	58.7917	5.21143
	A2	Sequence	# PSMs	# Proteins	# Protein Groups	Protein Group Accessions	Modifications	ΔCn	Area	q-Value	PEP	XCorr	Charge	MH+ [Da]	ΔM [ppm]	RT [min]	# Missed Cleavages
	High	NQILNLTTDNANILLQIDNAR	2	1	1	P13645		0	4.93491e+07	0	3.367e-06	5.10906	3	2367.26	-1.79248	100.713	0
	High	SKELTTEIDNNIEQISSYK	3	1	1	P13645		0	3.94673e+08	0	6.253e-07	5.08649	2	2212.11	5.2644	76.6369	1
	High	TIDDLKNQILNLTTDNANILLQIDNAR	1	1	1	P13645		0	5.48108e+08	0	0.0001394	4.97053	3	3052.62	-1.69157	102.481	1
	High	GSLGGGFSSGGFSGGSFSR	5	1	1	P13645		0	8.71175e+08	0	2.393e-06	4.84739	2	1707.77	-1.41021	70.3171	0
	High	YcVQLSQIQAQISALEEQLQQIR	1	1	1	P13645	C2(Carbamidomethyl)	0	1.16587e+07	0	1.477e-07	4.79285	2	2746.42	0.497592	103.143	0
	High	AETEcQNTEYQQLLDIK	2	1	1	P13645	C5(Carbamidomethyl)	0	9.772e+07	0	7.136e-05	4.32328	2	2082.96	-1.76002	78.8081	0
	High	ADLEmQIESLTEELAYLK	2	1	1	P13645	M5(Oxidation)	0	2.29752e+07	0	1.971e-06	4.21203	2	2112.04	-1.37798	103.607	0
	High	VLDELTLTKADLEmQIESLTEELAYLKK	1	1	1	P13645	M14(Oxidation)	0	6.87034e+07	0	0.0001394	3.39702	4	3252.71	-0.922982	102.444	2
	High	ELTTEIDNNIEQISSYK	2	1	1	P13645		0	1.03555e+08	0	0.0001394	3.29519	2	1996.96	-3.31415	84.1307	0
	High	LKYENEVALR	2	1	1	P13645		0	6.12465e+08	0	0.0001394	3.10731	3	1234.68	-2.60423	38.8917	1
	High	ALEESNYELEGK	1	1	1	P13645		0	1.12257e+09	0	0.0001394	2.94438	2	1381.65	-2.28291	44.5502	0
	High	ADLEmQIESLTEELAYLKK	3	1	1	P13645	M5(Oxidation)	0	3.56508e+08	0	0.0001394	2.91369	3	2240.13	-1.93153	101.431	1
	High	VLDELTLTK	1	1	1	P13645		0	7.16197e+08	0	0.00125	2.89412	2	1031.6	-2.52093	63.2117	0
	High	DAEAWFNEK	2	4	1	P13645		0	8.59002e+08	0	0.0005186	2.73759	2	1109.49	-2.27043	60.2964	0
	High	QSVEADINGLR	1	7	1	P13645		0	6.21407e+07	0	0.0002268	2.30197	2	1201.61	-2.91794	51.5742	0
	High	IRLENEIQTYR	1	1	1	P13645		0	3.00735e+08	0	0.0004178	2.0219	2	1434.77	-3.18717	48.0678	1
	High	SLLEGEGSSGGGGR	2	1	1	P13645		0	5.13885e+08	0.001	0.005993	2.43836	2	1262.59	-2.89709	30.6317	0
	High	SQYEQLAEQNR	1	1	1	P13645		0	1.44415e+08	0.001	0.007069	2.16537	2	1365.63	-7.98587	34.0594	0
	High	IKEWYEK	1	1	1	P13645		0	2.84524e+08	0.002	0.00805	2.39239	2	995.517	-2.44274	27.3331	1
	High	SQYEQLAEQNRKDAEAWFNEK	1	1	1	P13645		0	2.59367e+07	0.002	0.01261	2.21407	3	2584.2	-1.17214	68.0216	2
	High	KDAEAWFNEK	1	2	1	P13645		0	1.70205e+07	0.002	0.007796	2.14827	3	1237.58	-1.10868	38.3585	1
	High	LAADDFR	1	34	3	P13645;P02533;P08779		0	6.98228e+08	0.002	0.007139	1.9208	2	807.398	-2.35282	36.3137	0
	High	LASYLDKVR	3	15	3	P13645;P02533;P08779		0	4.41883e+08	0.002	0.007069	1.76314	2	1064.61	-2.52297	38.013	1
	High	YENEVALR	1	1	1	P13645		0	8.61219e+07	0.002	0.008427	1.7367	2	993.497	-2.61522	33.9453	0
	High	SQYEQLAEQNRK	1	1	1	P13645		0	618490097	0.005	0.05572	2.00026	2	1493.73	-2.80584	26.2439	1
P35908	Keratin, type II cytoskeletal 2 epidermal OS=Homo sapiens OX=9606 GN=KRT2 PE=1 SV=2 - [K22E_HUMAN]	115.7	49.3	8	20	25	41	1.41883e+09	639	65.3932	8.00146
	A2	Sequence	# PSMs	# Proteins	# Protein Groups	Protein Group Accessions	Modifications	ΔCn	Area	q-Value	PEP	XCorr	Charge	MH+ [Da]	ΔM [ppm]	RT [min]	# Missed Cleavages
	High	FGGFGGPGGVGGLGGPGGFGPGGYPGGIHEVSVNQSLLQPLNVK	1	1	1	P35908		0	1.79679e+08	0	0.0001394	5.30272	3	4092.09	3.1317	100.394	0
	High	SKEEAEALYHSKYEELQVTVGR	2	1	1	P35908		0	62835890	0	3.385e-06	4.72765	3	2566.27	-4.0135	57.663	2
	High	SISISVAGGGGGFGAAGGFGGR	5	1	1	P35908		0	1.23883e+08	0	2.765e-07	4.31588	2	1838.91	-2.34239	84.6985	0
	High	SKEEAEALYHSK	2	1	1	P35908		0	218286038	0	1.517e-05	4.23363	3	1391.68	-2.36965	22.6119	1
	High	GGSGGGGSISGGGYGSGGGSGGR	1	1	1	P35908		0	5.78528e+07	0	2.91e-10	4.09163	2	1741.75	-2.01441	24.6755	0
	High	NKLNDLEEALQQAKEDLAR	2	1	1	P35908		0	1.55132e+08	0	1.447e-05	4.08866	4	2198.14	-0.779854	93.454	2
	High	NKLNDLEEALQQAK	2	1	1	P35908		0	9.61459e+07	0	6.858e-05	3.99327	2	1613.85	-2.1864	70.0306	1
	High	FLEQQNQVLQTK	4	10	2	P35908;H6VRF8		0	2.92444e+09	0	0.0001394	3.76229	2	1475.78	-2.47834	53.0949	0
	High	GGGFGGGSSFGGGSGFSGGGFGGGGFGGGR	1	1	1	P35908		0	2.18255e+07	0	3.042e-07	3.71844	2	2399.01	-3.75664	85.4188	0
	High	YEELQVTVGR	2	1	1	P35908		0	3.51158e+08	0	0.0001394	3.28239	2	1193.61	-2.23722	53.8482	0
	High	LLRDYQELmNVK	1	5	1	P35908	M9(Oxidation)	0	3.13474e+07	0	0.002128	3.11316	3	1537.8	-2.65978	50.6313	1
	High	GFSSGSAVVSGGSR	1	1	1	P35908		0	3.73254e+08	0	0.0001394	3.05961	2	1254.6	-2.54879	33.5015	0
	High	TAAENDFVTLKK	2	1	1	P35908		0	2.57719e+08	0	0.0002952	2.91168	2	1336.71	-2.1231	38.3891	1
	High	NVQDAIADAEQR	1	1	1	P35908		0	9.24532e+07	0	0.0001394	2.83922	2	1329.64	-1.06363	50.2735	0
	High	IEISELNR	2	8	2	P35908;H6VRF8		0	958777098	0	0.001812	2.66899	2	973.529	-2.54241	47.7458	0
	High	LALDVEIATYR	1	20	3	P35908;P13647;B4DRR0		0	2.21247e+07	0	0.0001394	2.41825	2	1263.69	-1.93019	83.5704	0
	High	NVQDAIADAEQRGEHALKDAR	2	1	1	P35908		0	1.47906e+07	0.001	0.005087	2.87031	3	2307.14	-2.62788	69.6607	2
	High	TSQNSELNNmQDLVEDYKK	1	1	1	P35908	M10(Oxidation)	0	87933692	0.001	0.004466	2.64681	3	2272.03	-2.83707	47.4521	1
	High	LALDVEIATYRK	1	20	3	P35908;P13647;B4DRR0		0	0	0.001	0.007069	1.86021	2	1391.78	-3.15537	66.2915	1
	High	STSSFScLSR	1	1	1	P35908	C7(Carbamidomethyl)	0	3.50672e+07	0.002	0.007069	2.0174	2	1131.51	-2.26555	35.182	0
	High	LQGEIAHVKK	1	1	1	P35908		0	1.30473e+07	0.002	0.008829	1.85634	2	1122.66	-3.27075	21.5896	1
	High	HGGGGGGFGGGGFGSR	1	1	1	P35908		0	130328348	0.003	0.01533	2.25518	3	1320.58	-2.5124	26.5732	0
	High	FASFIDKVR	2	29	5	P35908;P13647;B4DRR0;Q14CN4;P05787		0	1.94445e+08	0.003	0.02404	1.68462	3	1082.6	-2.55823	50.9214	1
	High	DYQELmNVK	1	5	1	P35908	M6(Oxidation)	0	1.19228e+07	0.007	0.08419	1.82725	2	1155.53	-3.07613	42.7384	0
	High	TAAENDFVTLK	1	1	1	P35908		0	4.99126e+07	0.007	0.08289	1.76122	2	1208.61	-2.24769	52.654	0
B3KPS3	Tubulin alpha chain OS=Homo sapiens OX=9606 PE=2 SV=1 - [B3KPS3_HUMAN]	110.115	55.05	26	3	19	39	1.1129e+09	416	46.2118	5.12256
	A2	Sequence	# PSMs	# Proteins	# Protein Groups	Protein Group Accessions	Modifications	ΔCn	Area	q-Value	PEP	XCorr	Charge	MH+ [Da]	ΔM [ppm]	RT [min]	# Missed Cleavages
	High	AVcmLSNTTAIAEAWAR	2	17	1	B3KPS3	C3(Carbamidomethyl); M4(Oxidation)	0	4.20123e+07	0	2.743e-06	4.97217	2	1880.9	-1.99523	83.2698	0
	High	AFVHWYVGEGmEEGEFSEAR	3	18	2	B3KPS3;Q53GA7	M11(Oxidation)	0	2.92632e+08	0	1.835e-05	4.71015	3	2346.01	-2.24063	75.957	0
	High	AVFVDLEPTVIDEVR	3	19	2	B3KPS3;Q53GA7		0	5.48762e+08	0	3.382e-06	4.34891	2	1701.9	-2.04474	99.7104	0
	High	TIGGGDDSFNTFFSETGAGK	2	23	2	B3KPS3;Q53GA7		0	7.7485e+08	0	1.483e-06	4.04395	2	2007.89	-1.41189	91.7116	0
	High	IHFPLATYAPVISAEK	4	17	2	B3KPS3;Q53GA7		0	1.37233e+09	0	0.0001394	3.75161	3	1756.96	-2.22917	85.9662	0
	High	FDGALNVDLTEFQTNLVPYPR	2	20	2	B3KPS3;Q53GA7		0	92598445	0	0.0001394	3.58802	2	2409.2	-1.74663	101.723	0
	High	QLFHPEQLITGKEDAANNYAR	3	28	2	B3KPS3;Q53GA7		0	4.93532e+08	0	0.0001394	3.5594	3	2415.2	-2.20148	66.1499	1
	High	RAFVHWYVGEGmEEGEFSEAR	1	18	2	B3KPS3;Q53GA7	M12(Oxidation)	0	9.95117e+06	0	0.0001394	3.39346	3	2502.11	-1.97278	64.4543	1
	High	VGINYQPPTVVPGGDLAK	2	22	2	B3KPS3;Q53GA7		0	1.01859e+09	0	0.0001394	3.22136	2	1824.98	-1.86744	82.8085	0
	High	RSIQFVDWcPTGFK	1	6	1	B3KPS3	C9(Carbamidomethyl)	0	2.27372e+07	0	0.001571	3.11973	3	1740.85	-2.64104	78.8811	1
	High	SIQFVDWcPTGFK	2	6	1	B3KPS3	C8(Carbamidomethyl)	0	2.85866e+08	0	0.0001394	2.97143	2	1584.75	-1.28473	96.1406	0
	High	LISQIVSSITASLR	2	16	2	B3KPS3;Q53GA7		0	1.58174e+08	0	0.0001394	2.89402	3	1487.88	-2.53375	100.854	0
	High	DVNAAIATIK	1	15	2	B3KPS3;Q53GA7		0	6.35122e+08	0	0.0001486	2.69532	2	1015.58	-2.40065	57.3407	0
	High	LDHKFDLmYAK	2	21	2	B3KPS3;Q53GA7	M8(Oxidation)	0	188914484	0	0.0001394	2.64709	3	1396.69	-1.86405	40.4591	1
	High	EIIDLVLDR	2	16	2	B3KPS3;Q53GA7		0	3.53877e+08	0	0.001969	2.15996	2	1085.62	-2.24565	93.6585	0
	High	NLDIERPTYTNLNR	2	21	2	B3KPS3;Q53GA7		0	9.47789e+08	0.001	0.007069	2.20217	3	1718.88	-2.46645	56.3032	0
	High	QLFHPEQLITGK	2	30	2	Q53GA7;B3KPS3		0	1.43639e+08	0.001	0.005692	1.79843	3	1410.77	-2.97089	65.8969	0
	High	RNLDIERPTYTNLNR	2	21	2	B3KPS3;Q53GA7		0	59058171	0.002	0.007069	2.39368	4	1874.98	-3.39948	45.0421	1
	High	GHYTIGKEIIDLVLDR	1	16	2	B3KPS3;Q53GA7		0	1.18395e+07	0.002	0.007069	2.15419	3	1842.02	2.88642	96.8698	1
A4QN19	Protein transport protein sec16 (Fragment) OS=Homo sapiens OX=9606 GN=SEC16A PE=2 SV=1 - [A4QN19_HUMAN]	108.578	34.39	4	1	34	43	2.67421e+08	1727	186.378	5.40186
	A2	Sequence	# PSMs	# Proteins	# Protein Groups	Protein Group Accessions	Modifications	ΔCn	Area	q-Value	PEP	XCorr	Charge	MH+ [Da]	ΔM [ppm]	RT [min]	# Missed Cleavages
	High	SPNEANLIDFTNEAVEQVEEEESGEAQLSFLTGGPAAAASSLER	1	7	3	F1T0I1;O15027;A4QN19		0	1.30289e+07	0	0.0001394	6.31538	5	4607.15	-1.10892	103.995	0
	High	SHNVAAGSYEAPLPPGSFHGDFAYGTYR	2	8	3	F1T0I1;O15027;A4QN19		0	1.02336e+08	0	2e-05	4.80602	3	2968.37	0.38126	74.4175	0
	High	SILTQPHLYSPVLISQLVQmASQLR	1	8	3	F1T0I1;O15027;A4QN19	M20(Oxidation)	0	1.19278e+08	0	0.0001394	4.51818	3	2838.55	-1.84731	101.334	0
	High	QNGTVVGTDIAELLLR	2	7	3	F1T0I1;O15027;A4QN19		0	2.33749e+07	0	0.0001394	4.04005	3	1698.94	0.113927	100.992	0
	High	EKPEEESLAAPTWLVHLQQVER	2	8	3	F1T0I1;O15027;A4QN19		0	2.71761e+08	0	1.159e-05	3.9239	3	2589.33	-1.42072	86.9842	0
	High	YRPYDGAASAYAQNYR	2	6	3	F1T0I1;O15027;A4QN19		0	1.67298e+08	0	0.0001394	3.6752	3	1865.85	-2.14277	46.212	0
	High	SPDPGIVPQEAPVGNSLSELSEENFDGK	1	9	3	F1T0I1;O15027;A4QN19		0	1.0881e+07	0	0.0001394	3.40532	3	2912.38	-1.43108	99.2285	0
	High	NQWVNLNEPEEEKKAPPPPPTSmPK	1	10	3	F1T0I1;O15027;A4QN19	M23(Oxidation)	0	1.61921e+07	0	0.003549	3.25269	3	2873.41	-2.39739	53.3394	2
	High	YRPYDGAASAYAQNYRYPEPERPSSR	1	6	3	F1T0I1;O15027;A4QN19		0	5.96842e+07	0	0.0001394	3.23446	4	3064.42	-2.34799	51.3728	1
	High	DDTHKVDVINFAQNK	3	7	3	F1T0I1;O15027;A4QN19		0	2.3372e+08	0	0.0001394	3.22624	2	1743.86	-1.87557	49.87	1
	High	TVQAAPPALPGPPGAPVNmYSR	2	12	3	F1T0I1;O15027;A4QN19	M19(Oxidation)	0	2.84299e+08	0	0.0001394	2.92519	3	2207.12	-1.58738	75.9895	0
	High	TmATmGDTLASR	1	8	3	F1T0I1;O15027;A4QN19	M2(Oxidation); M5(Oxidation)	0	1.32004e+08	0	0.0004862	2.773	2	1286.57	-2.00065	25.0493	0
	High	YVDVLNPSGTQR	1	13	3	F1T0I1;O15027;A4QN19		0	2.28196e+08	0	0.0001394	2.72837	2	1348.68	-2.62988	52.3477	0
	High	GGIGASENLENPPKmGEEEALQSQVTK	1	1	1	A4QN19	M15(Oxidation)	0	35690960	0	0.0001394	2.67861	3	2829.34	-5.70723	61.0189	1
	High	LVLIGSNHSLPFLK	1	8	3	F1T0I1;O15027;A4QN19		0	6.32177e+07	0	0.0001394	2.53586	2	1537.91	-2.41993	86.7695	0
	High	HGAVcHTGAPDATLHTVHPDSVSSSYSSR	1	6	3	F1T0I1;O15027;A4QN19	C5(Carbamidomethyl)	0	1.79701e+07	0	0.0001394	2.43865	5	3033.38	-2.17876	38.3385	0
	High	AQQELVPPQQQASPPQLPK	1	6	3	F1T0I1;O15027;A4QN19		0	7.11116e+06	0	0.000147	2.3635	2	2084.11	-0.467764	65.5478	0
	High	FATNEAIQR	1	8	3	F1T0I1;O15027;A4QN19		0	1.88396e+08	0	0.0003582	2.31188	2	1049.53	-2.75151	32.2308	0
	High	NGLWGHALLLASK	1	8	3	F1T0I1;O15027;A4QN19		0	5.41585e+07	0	0.0003182	2.29878	2	1379.78	-2.56186	72.7435	0
	High	LAEmGLATQAFHYcEAIAK	1	8	3	F1T0I1;O15027;A4QN19	M4(Oxidation); C14(Carbamidomethyl)	0	3.06201e+07	0	0.002046	1.89396	3	2140.01	-3.18148	74.6626	0
	High	KTEAYLPDDKNK	1	9	3	F1T0I1;O15027;A4QN19		0	2.36804e+07	0.001	0.004779	3.23235	2	1421.72	-2.8636	22.6226	2
	High	GLANPEPAPEPK	1	14	3	F1T0I1;O15027;A4QN19		0	2.46202e+08	0.001	0.007069	2.73632	2	1219.63	-3.23548	36.2702	0
	High	GGIGASENLENPPK	1	6	3	F1T0I1;O15027;A4QN19		0	3.82185e+07	0.001	0.005939	2.38331	2	1382.69	-1.69452	41.8993	0
	High	QGYPEGYYSSK	1	6	3	F1T0I1;O15027;A4QN19		0	6.41191e+07	0.002	0.007503	2.10266	2	1278.56	-2.92296	33.9969	0
	High	ADSGPTQPPLSLSPAPETK	2	9	3	F1T0I1;O15027;A4QN19		0	1.19562e+08	0.002	0.009865	2.0213	2	1892.96	-2.10729	66.9115	0
	High	HLLQEAR	1	9	3	F1T0I1;O15027;A4QN19		0	1.67599e+07	0.002	0.01094	1.83792	2	866.482	-2.7596	22.7501	0
	High	SGWSSQSDYYASYYSSQYDYGDPGHWDR	1	6	3	F1T0I1;O15027;A4QN19		0	46168214	0.003	0.01774	2.83785	3	3327.31	-3.47986	89.6603	0
	High	TEAYLPDDKNK	1	9	3	F1T0I1;O15027;A4QN19		0	1.93512e+07	0.003	0.02525	2.01157	2	1293.63	-2.95897	26.3433	1
	High	SHLVGVKPFEADR	1	6	3	F1T0I1;O15027;A4QN19		0	3.56913e+07	0.003	0.02739	1.91411	3	1454.77	-2.8892	36.3426	0
	High	TVPDSEAPPGWDR	2	9	3	F1T0I1;O15027;A4QN19		0	123684262	0.003	0.02527	1.62468	2	1426.66	-2.89071	52.4471	0
	High	WGDWRPHLAmVLSNLNNNmDVESR	1	8	3	F1T0I1;O15027;A4QN19	M10(Oxidation); M19(Oxidation)	0	1.75911e+07	0.004	0.03308	2.15961	4	2886.33	-3.19486	92.0026	0
	High	KGESWFFR	1	9	3	F1T0I1;O15027;A4QN19		0	9.24316e+07	0.004	0.03964	1.67418	2	1056.52	-2.44588	49.5864	1
	High	LLPSAPQTLPDGPLASPAR	1	8	3	F1T0I1;O15027;A4QN19		0	2.05062e+08	0.006	0.0667	2.0636	3	1901.05	-1.77838	84.8612	0
	High	FTGSFDDDPDPHRDPYGEEVDRR	1	8	3	F1T0I1;O15027;A4QN19		0	3.37898e+07	0.008	0.0912	2.22677	3	2722.17	-1.12235	50.2477	2
Q53GA7	Tubulin alpha chain (Fragment) OS=Homo sapiens OX=9606 PE=2 SV=1 - [Q53GA7_HUMAN]	107.164	56.35	24	4	20	39	1.1129e+09	449	49.7914	5.13525
	A2	Sequence	# PSMs	# Proteins	# Protein Groups	Protein Group Accessions	Modifications	ΔCn	Area	q-Value	PEP	XCorr	Charge	MH+ [Da]	ΔM [ppm]	RT [min]	# Missed Cleavages
	High	AFVHWYVGEGmEEGEFSEAR	3	18	2	B3KPS3;Q53GA7	M11(Oxidation)	0	2.92632e+08	0	1.835e-05	4.71015	3	2346.01	-2.24063	75.957	0
	High	AVFVDLEPTVIDEVR	3	19	2	B3KPS3;Q53GA7		0	5.48762e+08	0	3.382e-06	4.34891	2	1701.9	-2.04474	99.7104	0
	High	TIGGGDDSFNTFFSETGAGK	2	23	2	B3KPS3;Q53GA7		0	7.7485e+08	0	1.483e-06	4.04395	2	2007.89	-1.41189	91.7116	0
	High	IHFPLATYAPVISAEK	4	17	2	B3KPS3;Q53GA7		0	1.37233e+09	0	0.0001394	3.75161	3	1756.96	-2.22917	85.9662	0
	High	FDGALNVDLTEFQTNLVPYPR	2	20	2	B3KPS3;Q53GA7		0	92598445	0	0.0001394	3.58802	2	2409.2	-1.74663	101.723	0
	High	QLFHPEQLITGKEDAANNYAR	3	28	2	B3KPS3;Q53GA7		0	4.93532e+08	0	0.0001394	3.5594	3	2415.2	-2.20148	66.1499	1
	High	RAFVHWYVGEGmEEGEFSEAR	1	18	2	B3KPS3;Q53GA7	M12(Oxidation)	0	9.95117e+06	0	0.0001394	3.39346	3	2502.11	-1.97278	64.4543	1
	High	VGINYQPPTVVPGGDLAK	2	22	2	B3KPS3;Q53GA7		0	1.01859e+09	0	0.0001394	3.22136	2	1824.98	-1.86744	82.8085	0
	High	LISQIVSSITASLR	2	16	2	B3KPS3;Q53GA7		0	1.58174e+08	0	0.0001394	2.89402	3	1487.88	-2.53375	100.854	0
	High	AVcmLSNTTAVAEAWAR	2	6	1	Q53GA7	C3(Carbamidomethyl); M4(Oxidation)	0	10916159	0	0.0001394	2.89272	2	1866.88	-1.86604	76.0124	0
	High	DVNAAIATIK	1	15	2	B3KPS3;Q53GA7		0	6.35122e+08	0	0.0001486	2.69532	2	1015.58	-2.40065	57.3407	0
	High	LDHKFDLmYAK	2	21	2	B3KPS3;Q53GA7	M8(Oxidation)	0	188914484	0	0.0001394	2.64709	3	1396.69	-1.86405	40.4591	1
	High	TIQFVDWcPTGFK	1	15	1	Q53GA7	C8(Carbamidomethyl)	0	1.22932e+08	0	0.0001614	2.54552	2	1598.77	-0.830991	97.2109	0
	High	EIIDLVLDR	2	16	2	B3KPS3;Q53GA7		0	3.53877e+08	0	0.001969	2.15996	2	1085.62	-2.24565	93.6585	0
	High	AYHEQLTVAEITNAcFEPANQmVK	1	6	1	Q53GA7	C15(Carbamidomethyl); M22(Oxidation)	0	7.6209e+07	0.001	0.006978	2.84509	3	2780.3	-1.69981	78.5814	0
	High	RTIQFVDWcPTGFK	1	15	1	Q53GA7	C9(Carbamidomethyl)	0	1.82393e+06	0.001	0.005787	2.2933	2	1754.87	0.0515719	80.015	1
	High	NLDIERPTYTNLNR	2	21	2	B3KPS3;Q53GA7		0	9.47789e+08	0.001	0.007069	2.20217	3	1718.88	-2.46645	56.3032	0
	High	QLFHPEQLITGK	2	30	2	Q53GA7;B3KPS3		0	1.43639e+08	0.001	0.005692	1.79843	3	1410.77	-2.97089	65.8969	0
	High	RNLDIERPTYTNLNR	2	21	2	B3KPS3;Q53GA7		0	59058171	0.002	0.007069	2.39368	4	1874.98	-3.39948	45.0421	1
	High	GHYTIGKEIIDLVLDR	1	16	2	B3KPS3;Q53GA7		0	1.18395e+07	0.002	0.007069	2.15419	3	1842.02	2.88642	96.8698	1
Q08211	ATP-dependent RNA helicase A OS=Homo sapiens OX=9606 GN=DHX9 PE=1 SV=4 - [DHX9_HUMAN]	99.2558	33.7	4	32	32	39	2.32796e+08	1270	140.869	6.84424
	A2	Sequence	# PSMs	# Proteins	# Protein Groups	Protein Group Accessions	Modifications	ΔCn	Area	q-Value	PEP	XCorr	Charge	MH+ [Da]	ΔM [ppm]	RT [min]	# Missed Cleavages
	High	GmTLVTPLQLLLFASK	3	2	1	Q08211	M2(Oxidation)	0	74117558	0	2.551e-07	5.17013	3	1748	-1.76108	102.944	0
	High	NELmYQLEQDHDLQAILQER	1	3	1	Q08211	M4(Oxidation)	0	2.6209e+07	0	2.534e-06	4.18737	3	2502.18	-3.31701	92.2884	0
	High	FSDHVALLSVFQAWDDAR	1	2	1	Q08211		0	1.19658e+07	0	8.971e-08	4.1169	2	2077.01	0.0492603	100.806	0
	High	GISHVIVDEIHER	2	3	1	Q08211		0	2.03367e+08	0	0.0001394	3.62757	3	1503.79	-2.09311	47.0101	0
	High	LQISHEAAAcITGLR	1	2	1	Q08211	C10(Carbamidomethyl)	0	15566564	0	1.967e-05	3.57072	2	1639.85	-2.57929	59.8786	0
	High	AENNSEVGASGYGVPGPTWDR	2	3	1	Q08211		0	7.50818e+07	0	1.552e-06	3.35107	2	2162.98	0.598229	70.1774	0
	High	ELDALDANDELTPLGR	2	2	1	Q08211		0	2.31579e+08	0	0.0001394	3.34577	2	1741.86	-0.410229	90.8564	0
	High	QLYHLGVVEAYSGLTK	1	3	1	Q08211		0	2.6919e+07	0	0.0001027	3.20223	2	1777.94	-2.23728	75.8558	0
	High	LFTAHNNmTNYATVWASK	2	2	1	Q08211	M8(Oxidation)	0	9.87153e+07	0	0.0001394	3.10543	2	2084.98	-1.0629	60.9908	0
	High	VRPGFcFHLcSR	1	2	1	Q08211	C6(Carbamidomethyl); C10(Carbamidomethyl)	0	31808597	0	0.0001394	3.04201	3	1535.73	-1.76518	46.5553	0
	High	TTQVPQFILDDFIQNDR	1	3	1	Q08211		0	5.84963e+07	0	0.0001394	2.91478	2	2050.02	-2.43448	100.955	0
	High	AAEcNIVVTQPR	1	3	1	Q08211	C4(Carbamidomethyl)	0	7.04511e+07	0	0.0001394	2.8608	2	1357.69	-1.93873	41.363	0
	High	VKLFTAHNNmTNYATVWASK	1	2	1	Q08211	M10(Oxidation)	0	7.01411e+06	0	0.0002406	2.73163	3	2312.14	-3.3396	59.2417	1
	High	ETPFELIEALLK	1	1	1	Q08211		0	7.54096e+06	0	0.0002254	2.67123	2	1402.78	-0.606851	104.557	0
	High	ISAVSVAER	1	3	1	Q08211		0	7.84842e+07	0	0.0008634	2.4483	2	931.518	-3.50787	34.2729	0
	High	TPLHEIALSIK	1	2	1	Q08211		0	91685542	0	0.0001426	2.32068	2	1221.72	-3.04738	57.7233	0
	High	LGGIGQFLAK	1	2	1	Q08211		0	1.95197e+08	0	0.0001406	2.03922	2	1003.59	-1.70072	69.8045	0
	High	YQILPLHSQIPR	1	1	1	Q08211		0	2.50028e+08	0	0.00136	2.03458	3	1464.83	-2.94697	62.9153	0
	High	DKDDDGGEDDDANcNLIcGDEYGPETR	1	1	1	Q08211	C14(Carbamidomethyl); C18(Carbamidomethyl)	0	7.97602e+06	0.001	0.004287	3.06839	3	3045.15	-3.77222	66.2181	1
	High	DINTDFLLVVLR	1	3	1	Q08211		0	9.46611e+06	0.001	0.003782	2.60517	2	1417.8	-1.57238	103.482	0
	High	KVQSDGQIVLVDDWIK	1	2	1	Q08211		0	2.7306e+07	0.001	0.005257	2.56642	3	1842.99	-1.20006	82.6276	1
	High	DFVNYLVR	1	3	1	Q08211		0	1.45096e+08	0.001	0.004025	2.3652	2	1025.54	-2.55996	81.5572	0
	High	LAQFEPSQR	1	3	1	Q08211		0	2.1678e+08	0.001	0.004778	2.10997	2	1075.55	-2.14072	34.1438	0
	High	YPSPFFVFGEK	1	2	1	Q08211		0	31765914	0.001	0.006931	1.9642	2	1317.65	-1.50999	97.603	0
	High	LAAQScALSLVR	1	3	1	Q08211	C6(Carbamidomethyl)	0	6.3387e+07	0.001	0.005055	1.59532	2	1288.7	-3.10576	62.1502	0
	High	HLEmNPHFGSHR	1	1	1	Q08211	M4(Oxidation)	0	1.59407e+07	0.002	0.007069	2.57747	2	1477.67	-2.10296	21.4862	0
	High	QISRPSAAGINLmIGSTR	1	2	1	Q08211	M13(Oxidation)	0	1.74639e+08	0.002	0.007069	2.1026	3	1888.01	-0.75103	59.5174	0
	High	QPAIISQLDPVNER	1	2	1	Q08211		0	4.49438e+07	0.002	0.007541	2.07383	2	1579.84	-0.464637	75.3768	0
	High	GANLKDYYSR	1	3	1	Q08211		0	6.19236e+07	0.004	0.04161	1.74632	2	1186.58	-3.40391	30.6592	1
	High	VFDPVPVGVTK	1	1	1	Q08211		0	8.35218e+07	0.004	0.03443	1.74255	2	1157.65	-1.58995	67.5825	0
	High	LETHmTPEmFR	2	2	1	Q08211	M5(Oxidation); M9(Oxidation)	0	4.51113e+07	0.004	0.03051	1.69978	3	1423.63	-3.06273	30.5457	0
	High	RLGYIHR	1	2	1	Q08211		0	3.66328e+06	0.006	0.07155	2.37495	3	914.53	-2.06485	22.1727	1
Q9BSV4	SFPQ protein (Fragment) OS=Homo sapiens OX=9606 GN=SFPQ PE=2 SV=2 - [Q9BSV4_HUMAN]	96.2369	35.96	5	19	20	37	8.5324e+08	634	68.5879	8.82178
	A2	Sequence	# PSMs	# Proteins	# Protein Groups	Protein Group Accessions	Modifications	ΔCn	Area	q-Value	PEP	XCorr	Charge	MH+ [Da]	ΔM [ppm]	RT [min]	# Missed Cleavages
	High	mPGGPKPGGGPGLSTPGGHPKPPHR	4	3	1	Q9BSV4	M1(Oxidation)	0	2.61892e+08	0	7.774e-05	4.15122	4	2386.21	-3.05555	26.2846	0
	High	NLSPYVSNELLEEAFSQFGPIER	4	4	1	Q9BSV4		0	2.31421e+08	0	0.0001338	3.73422	2	2639.29	-2.12967	102.679	0
	High	ISDSEGFKANLSLLR	1	4	1	Q9BSV4		0	1.01688e+08	0	0.0001394	3.64774	3	1649.88	-2.48764	71.1766	1
	High	DAKDKLESEmEDAYHEHQANLLR	3	4	1	Q9BSV4	M10(Oxidation)	0	4.26336e+07	0	0.0001394	3.63575	4	2758.27	-1.7673	49.744	2
	High	DKLESEmEDAYHEHQANLLR	2	4	1	Q9BSV4	M7(Oxidation)	0	1.07006e+08	0	0.0001394	3.58383	3	2444.11	-3.11993	45.4783	1
	High	FAQHGTFEYEYSQR	3	5	1	Q9BSV4		0	4.91162e+08	0	0.0001394	3.48829	3	1762.78	-2.21297	43.8872	0
	High	FATHAAALSVR	2	4	1	Q9BSV4		0	2.92269e+08	0	0.0001394	3.23733	3	1143.62	-2.12083	34.4644	0
	High	YGEPGEVFINK	2	4	1	Q9BSV4		0	6.14501e+08	0	0.0001394	2.96875	2	1252.62	-2.61851	56.9543	0
	High	FGQGGAGPVGGQGPR	1	3	1	Q9BSV4		0	785149902	0	0.0001488	2.89249	2	1341.66	-3.1622	33.9849	0
	High	QHHPPYHQQHHQGPPPGGPGGR	3	4	1	Q9BSV4		0	1.77372e+08	0	0.0001394	2.77996	4	2403.13	-3.03479	20.2707	0
	High	ALAEIAKAELDDTPmR	1	4	1	Q9BSV4	M15(Oxidation)	0	5.09058e+06	0	0.0001394	2.62481	2	1759.89	-2.01852	62.6307	1
	High	SEEKISDSEGFKANLSLLR	1	4	1	Q9BSV4		0	1.15623e+07	0	0.0004192	2.56325	3	2123.1	-0.946675	66.5391	2
	High	LFVGNLPADITEDEFK	1	4	1	Q9BSV4		0	2.81137e+07	0	4.23e-06	2.41645	2	1807.91	-1.0398	99.7404	0
	High	LFVGNLPADITEDEFKR	2	4	1	Q9BSV4		0	9.66537e+08	0.001	0.004157	2.62024	3	1964.01	-2.41685	90.8784	1
	High	GIVEFASKPAAR	2	4	1	Q9BSV4		0	3.98757e+08	0.001	0.004841	1.88054	2	1245.69	-2.21801	40.3088	0
	High	SEEKISDSEGFK	1	4	1	Q9BSV4		0	3.99476e+07	0.002	0.007069	3.08246	2	1355.63	-3.30617	27.255	1
	High	GmGPGTPAGYGR	1	3	1	Q9BSV4	M2(Oxidation)	0	1.28028e+08	0.002	0.0147	2.4691	2	1136.51	-2.00365	26.604	0
	High	AVVIVDDR	1	8	2	A8K525;Q9BSV4		0	808033183	0.002	0.01029	1.59698	2	886.497	-2.19882	36.6901	0
	High	ANLSLLR	1	4	1	Q9BSV4		0	2.13584e+08	0.003	0.02586	1.85371	2	786.481	-2.54619	46.7113	0
	High	ISDSEGFK	1	4	1	Q9BSV4		0	8.69418e+07	0.004	0.0304	2.0583	2	882.418	-2.88759	26.0461	0
Q9Y5B9	FACT complex subunit SPT16 OS=Homo sapiens OX=9606 GN=SUPT16H PE=1 SV=1 - [SP16H_HUMAN]	94.277	33.33	2	28	28	37	1.84829e+08	1047	119.838	5.65576
	A2	Sequence	# PSMs	# Proteins	# Protein Groups	Protein Group Accessions	Modifications	ΔCn	Area	q-Value	PEP	XCorr	Charge	MH+ [Da]	ΔM [ppm]	RT [min]	# Missed Cleavages
	High	HTDVQFYTEVGEITTDLGK	2	1	1	Q9Y5B9		0	9.00623e+07	0	1.78e-08	4.87075	2	2153.03	-3.37338	93.4932	0
	High	NVGIFLKNEDEEEEEEEKDEAEDLLGR	1	1	1	Q9Y5B9		0	6.33056e+07	0	0.0001435	4.4418	3	3178.47	4.19116	88.0287	2
	High	TYALFIGDTVLVDEDGPATVLTSVK	1	1	1	Q9Y5B9		0	1.2071e+07	0	3.242e-05	4.13147	2	2624.37	-0.654335	102.259	0
	High	EGIVKQDSLVINLNR	1	1	1	Q9Y5B9		0	3.91003e+07	0	0.0001983	3.83733	3	1697.95	-2.68322	67.9396	1
	High	NEDEEEEEEEKDEAEDLLGR	2	1	1	Q9Y5B9		0	1.5537e+08	0	8.915e-06	3.82001	3	2406.99	-1.8468	68.6729	1
	High	VmEIVDADEKVR	2	2	1	Q9Y5B9	M2(Oxidation)	0	56690460	0	0.0001394	3.3829	3	1419.71	-3.2803	36.4118	1
	High	AASITSEVFNK	1	2	1	Q9Y5B9		0	148844935	0	0.0001413	3.35582	2	1166.6	-2.47623	52.1952	0
	High	GNENANGAPAITLLIR	2	2	1	Q9Y5B9		0	7.33787e+07	0	0.0001394	3.20061	3	1623.88	0.150657	85.6868	0
	High	NISmSVEGDYTYLR	1	1	1	Q9Y5B9	M4(Oxidation)	0	2.98682e+07	0	0.0001394	3.14584	2	1663.76	-1.92873	66.692	0
	High	GDKVDILYNNIK	2	1	1	Q9Y5B9		0	49398622	0	0.001236	3.08814	2	1391.75	-1.47958	53.274	1
	High	KGmVFSINLGFSDLTNKEGK	1	1	1	Q9Y5B9	M3(Oxidation)	0	5.25921e+06	0	0.0001394	3.01981	3	2201.12	-2.036	77.7941	2
	High	HQHmHDRDDLYAEQmER	1	1	1	Q9Y5B9	M4(Oxidation); M15(Oxidation)	0	2.82044e+07	0	0.0001394	3.00564	3	2242.93	-3.98388	21.3821	1
	High	LKDLYIRPNIAQK	2	1	1	Q9Y5B9		0	57748444	0	0.0002054	2.71053	2	1571.92	-3.29078	44.2378	1
	High	NEGNIFPNPEATFVK	1	1	1	Q9Y5B9		0	2.45876e+08	0	0.0001394	2.69522	2	1676.82	-2.48281	84.1065	0
	High	INFYcPGSALGR	1	1	1	Q9Y5B9	C5(Carbamidomethyl)	0	5.45401e+07	0	0.0001409	2.65549	2	1354.65	-2.17091	70.5223	0
	High	QDSLVINLNR	1	1	1	Q9Y5B9		0	62432269	0	0.002598	2.2864	2	1171.64	-1.99609	62.6943	0
	High	ELAAQLNEEAK	1	1	1	Q9Y5B9		0	1.12265e+08	0	0.0001394	2.21465	2	1215.62	-2.30277	39.9737	0
	High	APGEQTVPALNLQNAFR	2	1	1	Q9Y5B9		0	153242103	0	0.0001394	2.21183	2	1825.95	-2.33837	87.4599	0
	High	IcDVYNAVmDVVKK	1	2	1	Q9Y5B9	C2(Carbamidomethyl); M9(Oxidation)	0	1.50825e+07	0	0.003035	1.85164	3	1669.83	-2.21692	72.589	1
	High	VEALTKEELEFEVPFR	1	1	1	Q9Y5B9		0	0	0.001	0.004097	2.72795	3	1936.01	-0.18943	90.5156	1
	High	NLGFGmGIEFR	1	2	1	Q9Y5B9	M6(Oxidation)	0	102078879	0.001	0.007069	2.49195	2	1256.61	-0.19092	78.4948	0
	High	mQGSLEAHVNGFR	2	1	1	Q9Y5B9	M1(Oxidation)	0	4.43896e+07	0.001	0.007069	2.22597	2	1461.69	-1.03027	38.3997	0
	High	NFIEKVEALTK	1	1	1	Q9Y5B9		0	6707066	0.001	0.004447	2.14247	2	1291.72	-0.706231	71.7134	1
	High	EGSLVINSK	1	2	1	Q9Y5B9		0	7.03686e+07	0.001	0.004479	2.00398	2	946.518	-2.64168	30.5815	0
	High	ELAAQLNEEAKR	2	1	1	Q9Y5B9		0	4.99444e+07	0.001	0.007069	1.55174	3	1371.72	-2.64008	33.3959	1
	High	SSFDKmIEAIKESK	1	2	1	Q9Y5B9	M6(Oxidation)	0	8.26067e+06	0.002	0.007069	2.7126	3	1628.81	-3.77473	42.4831	2
	High	DLGFNGAPYR	1	1	1	Q9Y5B9		0	66894701	0.002	0.008263	2.16797	2	1109.53	-2.71274	61.6238	0
	High	NVGIFLK	1	1	1	Q9Y5B9		0	2.83391e+07	0.003	0.02797	1.20271	2	790.481	-1.5012	56.1974	0
Q59GQ7	SWI/SNF-related matrix-associated actin-dependent regulator of chromatin a3 variant (Fragment) OS=Homo sapiens OX=9606 PE=2 SV=1 - [Q59GQ7_HUMAN]	93.9946	40.12	7	2	32	38	1.44384e+08	992	111.896	8.67529
	A2	Sequence	# PSMs	# Proteins	# Protein Groups	Protein Group Accessions	Modifications	ΔCn	Area	q-Value	PEP	XCorr	Charge	MH+ [Da]	ΔM [ppm]	RT [min]	# Missed Cleavages
	High	LFEDLKEDDKTHEmEPAEAIETPLLPHQK	1	7	2	Q59GQ7;A8K5B6	M14(Oxidation)	0	1.2645e+07	0	0.0001492	4.09916	4	3419.64	-8.16024	74.6487	2
	High	RVESIQcFQNTEAGSPTImLLSLK	1	5	2	Q59GQ7;A8K5B6	C7(Carbamidomethyl); M19(Oxidation)	0	1.66397e+07	0	0.003457	3.99865	3	2738.38	-2.00681	91.9314	1
	High	YFNEGTVLAHYADVLGLLLR	1	5	2	Q59GQ7;A8K5B6		0	1.21001e+07	0	3.377e-06	3.84556	3	2264.2	-2.8166	102.813	0
	High	YYTGVVNNNEmVALQR	2	7	2	Q59GQ7;A8K5B6	M11(Oxidation)	0	4.14192e+07	0	7.527e-07	3.67461	2	1886.9	-2.87013	59.9949	0
	High	TLGFNLESGWGSGR	1	7	2	Q59GQ7;A8K5B6		0	1.2547e+08	0	0.0001394	3.64022	2	1480.71	-2.42331	86.0749	0
	High	VFIQHITLSDEERK	2	4	1	Q59GQ7		0	62729102	0	0.0001394	3.47312	2	1714.91	-3.80311	47.6438	1
	High	VIEDVAFAcALTSSVPTTK	1	5	2	Q59GQ7;A8K5B6	C9(Carbamidomethyl)	0	27224493	0	7.6e-06	3.44647	3	2009.03	-0.379584	98.1002	0
	High	YLQTVQYGVHGNFPR	2	7	2	Q59GQ7;A8K5B6		0	141309861	0	9.897e-05	3.32419	2	1778.89	-2.22788	56.5451	0
	High	FIVKDSVEENmLK	1	4	2	Q59GQ7;A8K5B6	M11(Oxidation)	0	1.75753e+07	0	0.0009147	3.28131	2	1567.8	-2.76968	48.9098	1
	High	EYNVNDDSmKLGGNNTSEK	1	6	2	Q59GQ7;A8K5B6	M9(Oxidation)	0	5.56158e+06	0	0.0001394	3.20003	3	2130.92	-3.79663	32.3019	1
	High	AGGVGLNLSAASR	1	5	2	Q59GQ7;A8K5B6		0	1.62205e+08	0	8.449e-05	3.1984	2	1172.64	-2.33291	49.9654	0
	High	VFIQHITLSDEER	1	5	2	Q59GQ7;A8K5B6		0	1.83759e+07	0	0.0001394	3.06216	2	1586.81	-2.11043	58.6871	0
	High	DRPENVHGGILADDmGLGK	2	7	2	Q59GQ7;A8K5B6	M15(Oxidation)	0	1.05443e+08	0	0.0001394	3.06166	2	2009.97	-2.93578	46.2229	0
	High	NDLYYNTITNFSEK	1	7	2	Q59GQ7;A8K5B6		0	71614809	0	0.0001394	3.03312	2	1721.8	-1.94788	78.6342	0
	High	VILDEGHAIRNPNAQQTK	1	5	2	Q59GQ7;A8K5B6		0	1.04371e+07	0	0.0001394	2.98777	2	2004.06	-2.56822	36.2781	1
	High	cSEQPSISDIKEK	2	7	2	Q59GQ7;A8K5B6	C1(Carbamidomethyl)	0	7.94354e+06	0	0.000206	2.98437	2	1520.72	-3.6408	34.0633	1
	High	KVFIQHITLSDEERK	1	4	1	Q59GQ7		0	2.1341e+07	0	0.0001394	2.93944	3	1843	-1.62489	37.5892	2
	High	ENSKELPPFWEQR	1	7	2	Q59GQ7;A8K5B6		0	1.71224e+07	0	0.0001459	2.66519	2	1659.81	-3.13329	60.546	1
	High	KVFIQHITLSDEER	1	5	2	Q59GQ7;A8K5B6		0	2.71083e+07	0	0.0001537	2.65879	3	1714.91	-2.45849	46.9435	1
	High	LGGNNTSEKADGLSK	1	6	2	Q59GQ7;A8K5B6		0	1.10544e+07	0	0.0001529	2.50137	2	1490.74	-3.7163	23.272	1
	High	TLTAIAVILTNFHDGRPLPIER	1	7	2	Q59GQ7;A8K5B6		0	42024057	0	0.0001394	2.44514	4	2447.38	-0.16903	100.036	0
	High	DPNNPYDKNAIK	1	7	2	Q59GQ7;A8K5B6		0	2.74983e+07	0.002	0.01411	2.39307	3	1388.68	-3.34481	28.212	1
	High	INALmHALTDLR	1	5	2	Q59GQ7;A8K5B6	M5(Oxidation)	0	0	0.002	0.007069	2.37015	3	1383.74	-2.3151	61.0099	0
	High	LGQKQEVIITK	1	4	2	Q59GQ7;A8K5B6		0	8.65674e+06	0.002	0.0119	2.33842	2	1256.75	-2.97088	29.3057	1
	High	QALAWmVSR	1	7	2	Q59GQ7;A8K5B6	M6(Oxidation)	0	6.17584e+07	0.002	0.008613	1.97227	2	1077.55	-1.32537	51.1151	0
	High	ELAGALAYImDNK	1	7	2	Q59GQ7;A8K5B6	M10(Oxidation)	0	56235642	0.002	0.007156	1.78038	2	1424.71	2.28928	78.6615	0
	High	VILDEGHAIR	1	5	2	Q59GQ7;A8K5B6		0	3.1295e+07	0.002	0.01042	1.0554	3	1122.62	-2.68207	37.5718	0
	High	ELPPFWEQR	2	7	2	Q59GQ7;A8K5B6		0	1.29638e+08	0.003	0.01539	2.04289	2	1201.6	-2.49485	76.1369	0
	High	GKPVLELPERK	1	5	2	Q59GQ7;A8K5B6		0	1.26889e+07	0.005	0.04894	1.90119	2	1265.75	-3.03339	30.6177	1
	High	GKPVLELPER	1	5	2	Q59GQ7;A8K5B6		0	4.1441e+07	0.005	0.05415	1.31262	2	1137.66	-2.51715	42.042	0
	High	TIQRPVTmGDEGGLR	1	5	2	Q59GQ7;A8K5B6	M8(Oxidation)	0	4.42572e+07	0.005	0.05237	1.30974	3	1645.83	-2.14454	32.8576	0
	High	VNNVNGNQVGHLKK	1	7	2	Q59GQ7;A8K5B6		0	2.76498e+07	0.006	0.06484	1.5264	3	1520.82	-3.87514	21.9544	1
B1ANR0	Polyadenylate-binding protein OS=Homo sapiens OX=9606 GN=PABPC4 PE=1 SV=1 - [B1ANR0_HUMAN]	89.88	38.05	15	10	18	28	4.18695e+08	615	67.9279	9.45166
	A2	Sequence	# PSMs	# Proteins	# Protein Groups	Protein Group Accessions	Modifications	ΔCn	Area	q-Value	PEP	XCorr	Charge	MH+ [Da]	ΔM [ppm]	RT [min]	# Missed Cleavages
	High	RSLGYAYVNFQQPADAER	2	17	2	A0A087WTT1;B1ANR0		0	1.57384e+08	0	1.164e-07	4.77524	2	2085.01	-1.73775	62.5839	1
	High	ITGmLLEIDNSELLHmLESPESLR	2	18	2	A0A087WTT1;B1ANR0	M4(Oxidation); M16(Oxidation)	0	2.9198e+08	0	1.807e-06	4.51941	3	2772.37	-2.11368	100.234	0
	High	SLGYAYVNFQQPADAER	4	17	2	A0A087WTT1;B1ANR0		0	4.40306e+08	0	3.262e-06	4.22889	2	1928.91	-2.23436	76.7733	0
	High	SKVDEAVAVLQAHHAK	3	7	1	B1ANR0		0	1.34321e+08	0	1.867e-05	4.20195	2	1702.92	-3.04697	41.0456	1
	High	ALYDTFSAFGNILScK	2	14	2	A0A087WTT1;B1ANR0	C15(Carbamidomethyl)	0	1.03079e+08	0	1.524e-07	4.09698	2	1806.87	-1.32282	101.333	0
	High	GYAFVHFETQEAADKAIEK	1	6	1	B1ANR0		0	4.49967e+07	0	3.916e-05	4.01382	3	2154.05	-2.19815	62.2732	1
	High	NFGEEVDDESLKELFSQFGK	1	6	1	B1ANR0		0	2.27119e+07	0	0.0001394	3.54818	2	2318.08	-2.88175	100.711	1
	High	GFGFVSYEKHEDANK	2	6	1	B1ANR0		0	5.71838e+07	0	0.0001394	3.42699	2	1727.8	-1.92235	39.5022	1
	High	ALDTmNFDVIK	1	17	2	A0A087WTT1;B1ANR0	M5(Oxidation)	0	4.65221e+08	0	0.0001825	3.31267	2	1282.63	-2.87315	69.1422	0
	High	SKGFGFVcFSSPEEATK	1	23	2	A0A087WTT1;B1ANR0	C8(Carbamidomethyl)	0	3.05837e+07	0	9.766e-05	3.13081	2	1877.87	-2.84228	68.6764	1
	High	IVGSKPLYVALAQR	2	10	1	B1ANR0		0	2.1188e+08	0	7.81e-05	2.88204	2	1514.9	-2.38319	58.4901	0
	High	GFGFVSYEK	1	6	1	B1ANR0		0	5.3918e+07	0	0.00337	2.37864	2	1033.5	-3.55536	59.8228	0
	High	AKEFTNVYIK	1	15	2	A0A087WTT1;B1ANR0		0	350558794	0.001	0.005158	2.72958	2	1212.66	-2.86991	37.1802	1
	High	mNGmLLNDR	1	16	2	A0A087WTT1;B1ANR0	M1(Oxidation); M4(Oxidation)	0	14659349	0.001	0.007069	2.47614	2	1095.49	-1.64972	27.7536	0
	High	FSPAGPVLSIR	1	4	1	B1ANR0		0	1.55415e+08	0.002	0.009266	1.76429	2	1143.65	-2.0141	70.1813	0
	High	NLDDTIDDEKLRK	1	9	1	B1ANR0		0	1.77055e+07	0.003	0.01862	2.69165	2	1574.8	-2.37101	37.1527	2
	High	SGVGNVFIK	1	6	1	B1ANR0		0	1.05471e+08	0.005	0.04824	2.01931	2	920.518	-2.09371	47.5989	0
	High	KEFSPFGSITSAK	1	10	1	B1ANR0		0	1.23527e+07	0.006	0.06394	1.99924	2	1398.73	-0.475928	54.8094	1
P23396	40S ribosomal protein S3 OS=Homo sapiens OX=9606 GN=RPS3 PE=1 SV=2 - [RS3_HUMAN]	89.3188	70.78	16	19	19	31	5.20579e+08	243	26.6714	9.65674
	A2	Sequence	# PSMs	# Proteins	# Protein Groups	Protein Group Accessions	Modifications	ΔCn	Area	q-Value	PEP	XCorr	Charge	MH+ [Da]	ΔM [ppm]	RT [min]	# Missed Cleavages
	High	KPLPDHVSIVEPKDEILPTTPISEQK	3	7	1	P23396		0	4.19987e+08	0	0.0001394	4.4595	3	2910.58	-2.12854	73.3749	1
	High	FVDGLmIHSGDPVNYYVDTAVR	3	7	1	P23396	M6(Oxidation)	0	483132050	0	0.0001109	4.31088	3	2484.18	-2.10885	91.8206	0
	High	KPLPDHVSIVEPK	3	7	1	P23396		0	4.59778e+08	0	8.412e-07	4.0357	3	1458.83	-1.83005	41.083	0
	High	VKImLPWDPTGK	1	7	1	P23396	M4(Oxidation)	0	0	0	0.0001394	3.97944	3	1400.76	-1.67827	76.4327	1
	High	RFGFPEGSVELYAEK	2	6	1	P23396		0	4.32719e+07	0	4.712e-05	3.9205	3	1728.86	-2.40948	73.0889	1
	High	GGKPEPPAmPQPVPTA	3	6	1	P23396	M9(Oxidation)	0	5.0687e+08	0	0.0001394	3.27782	2	1589.8	-2.344	44.3328	0
	High	TEIIILATR	1	11	1	P23396		0	2.25113e+08	0	0.0003291	2.97088	2	1029.63	-3.22503	68.0183	0
	High	GLcAIAQAESLR	1	7	1	P23396	C3(Carbamidomethyl)	0	1.85677e+08	0	0.0001394	2.97041	2	1288.66	-2.44039	62.6546	0
	High	IRELTAVVQK	2	11	1	P23396		0	1.84623e+08	0	0.000786	2.95086	3	1156.7	-2.15707	35.5739	1
	High	ELAEDGYSGVEVR	1	11	1	P23396		0	5.71735e+08	0	0.0001394	2.80652	2	1423.67	-2.27276	53.5986	0
	High	VTPTRTEIIILATR	2	11	1	P23396		0	2.73432e+08	0	0.0001394	2.73181	3	1583.94	-2.20913	64.3206	1
	High	AELNEFLTR	1	13	1	P23396		0	463282291	0	0.000783	2.61476	2	1092.57	-0.822666	63.1885	0
	High	DEILPTTPISEQK	2	7	1	P23396		0	4.03293e+08	0	0.000244	2.24309	2	1470.77	-1.63068	70.8799	0
	High	FGFPEGSVELYAEK	1	6	1	P23396		0	4.50679e+08	0	0.0001394	2.10968	2	1572.76	-1.87362	87.1284	0
	High	IRELTAVVQKR	1	11	1	P23396		0	7.55624e+07	0.002	0.007069	2.94038	3	1312.8	-3.12101	29.2817	2
	High	LLGGLAVR	1	8	1	P23396		0	1.58216e+08	0.002	0.01128	1.62171	2	798.518	-1.92518	52.7593	0
	High	AcYGVLR	1	6	1	P23396	C2(Carbamidomethyl)	0	6.7268e+07	0.004	0.03614	0.971866	2	838.422	-2.3504	33.2627	0
	High	ELTAVVQK	1	11	1	P23396		0	8.12717e+07	0.005	0.04731	1.78328	2	887.518	-1.85724	31.9943	0
	High	FVADGIFK	1	10	1	P23396		0	1.73503e+08	0.009	0.09802	1.99483	2	896.486	-1.45633	65.5873	0
P42167	Lamina-associated polypeptide 2, isoforms beta/gamma OS=Homo sapiens OX=9606 GN=TMPO PE=1 SV=2 - [LAP2B_HUMAN]	88.9928	45.81	6	5	15	31	1.74255e+09	454	50.6395	9.37842
	A2	Sequence	# PSMs	# Proteins	# Protein Groups	Protein Group Accessions	Modifications	ΔCn	Area	q-Value	PEP	XCorr	Charge	MH+ [Da]	ΔM [ppm]	RT [min]	# Missed Cleavages
	High	RVEHNQSYSQAGITETEWTSGSSK	2	1	1	P42167		0	2.121e+08	0	6.574e-10	5.93777	3	2682.23	-2.86809	42.0226	1
	High	GPPDFSSDEEREPTPVLGSGAAAAGR	3	5	2	P42166;P42167		0	1.87331e+09	0	2.012e-08	5.13027	3	2570.2	-2.78392	66.1087	1
	High	DKLKSELVANNVTLPAGEQR	1	5	2	P42166;P42167		0	1.86516e+07	0	0.0001206	3.79303	2	2182.18	-2.15619	57.1735	2
	High	KDVYVQLYLQHLTAR	3	5	2	P42166;P42167		0	74574724	0	1.122e-06	3.77026	3	1847.01	-1.4936	70.6677	1
	High	DVYVQLYLQHLTAR	2	5	2	P42166;P42167		0	3.10833e+08	0	5.161e-05	3.70422	2	1718.92	-1.95257	92.3424	0
	High	HASPILPITEFSDIPR	3	3	1	P42167		0	7.96161e+08	0	1.701e-05	3.57426	3	1792.96	-2.19463	89.6321	0
	High	DILKEmFPYEASTPTGISAScR	2	5	1	P42167	M6(Oxidation); C21(Carbamidomethyl)	0	1.13679e+08	0	0.0001394	3.54932	3	2489.16	-2.99307	82.7083	1
	High	LKSELVANNVTLPAGEQRK	2	5	2	P42166;P42167		0	1.43202e+08	0	0.0007381	3.47868	4	2067.15	-2.77492	46.9587	2
	High	LKSELVANNVTLPAGEQR	1	5	2	P42166;P42167		0	329999032	0	0.0001394	3.35688	3	1939.06	-2.60542	57.1717	1
	High	QEDKDDLDVTELTNEDLLDQLVK	3	6	2	P42166;P42167		0	76690054	0	0.0008936	3.3398	2	2688.32	2.24835	100.9	1
	High	GAAGRPLELSDFR	2	6	1	P42167		0	3.89401e+08	0	0.001042	2.68069	3	1388.73	-2.25462	52.406	0
	High	SSTPLPTISSSAENTR	1	6	2	P42166;P42167		0	1.34776e+09	0	2.638e-06	2.37835	2	1647.81	-2.71199	52.9112	0
	High	YGVNPGPIVGTTR	3	6	2	P42166;P42167		0	2.00657e+09	0	0.001324	2.17521	2	1330.71	-1.52784	54.9895	0
	High	AKTPVTLK	1	5	1	P42167		0	1.62145e+08	0.003	0.01684	1.38447	2	857.543	-2.99225	23.0419	1
	High	NRPPLPAGTNSK	2	5	2	P42166;P42167		0	8.58899e+08	0.006	0.0613	1.12614	2	1251.68	-2.14858	24.305	0
A8K5B6	cDNA FLJ76830, highly similar to Homo sapiens SWI/SNF related, matrix associated, actin dependent regulator of chromatin, subfamily a, member 3 (SMARCA3), transcript variant 1, mRNA OS=Homo sapiens OX=9606 PE=2 SV=1 - [A8K5B6_HUMAN]	88.7869	41.53	4	1	31	36	1.44384e+08	1009	113.866	8.55811
	A2	Sequence	# PSMs	# Proteins	# Protein Groups	Protein Group Accessions	Modifications	ΔCn	Area	q-Value	PEP	XCorr	Charge	MH+ [Da]	ΔM [ppm]	RT [min]	# Missed Cleavages
	High	LFEDLKEDDKTHEmEPAEAIETPLLPHQK	1	7	2	Q59GQ7;A8K5B6	M14(Oxidation)	0	1.2645e+07	0	0.0001492	4.09916	4	3419.64	-8.16024	74.6487	2
	High	RVESIQcFQNTEAGSPTImLLSLK	1	5	2	Q59GQ7;A8K5B6	C7(Carbamidomethyl); M19(Oxidation)	0	1.66397e+07	0	0.003457	3.99865	3	2738.38	-2.00681	91.9314	1
	High	NDIHEDNLLEcPPEELAHDSEK	1	1	1	A8K5B6	C11(Carbamidomethyl)	0	7.81946e+06	0	0.0001394	3.97573	3	2604.14	-3.73222	65.7675	0
	High	YFNEGTVLAHYADVLGLLLR	1	5	2	Q59GQ7;A8K5B6		0	1.21001e+07	0	3.377e-06	3.84556	3	2264.2	-2.8166	102.813	0
	High	YYTGVVNNNEmVALQR	2	7	2	Q59GQ7;A8K5B6	M11(Oxidation)	0	4.14192e+07	0	7.527e-07	3.67461	2	1886.9	-2.87013	59.9949	0
	High	TLGFNLESGWGSGR	1	7	2	Q59GQ7;A8K5B6		0	1.2547e+08	0	0.0001394	3.64022	2	1480.71	-2.42331	86.0749	0
	High	VIEDVAFAcALTSSVPTTK	1	5	2	Q59GQ7;A8K5B6	C9(Carbamidomethyl)	0	27224493	0	7.6e-06	3.44647	3	2009.03	-0.379584	98.1002	0
	High	YLQTVQYGVHGNFPR	2	7	2	Q59GQ7;A8K5B6		0	141309861	0	9.897e-05	3.32419	2	1778.89	-2.22788	56.5451	0
	High	FIVKDSVEENmLK	1	4	2	Q59GQ7;A8K5B6	M11(Oxidation)	0	1.75753e+07	0	0.0009147	3.28131	2	1567.8	-2.76968	48.9098	1
	High	EYNVNDDSmKLGGNNTSEK	1	6	2	Q59GQ7;A8K5B6	M9(Oxidation)	0	5.56158e+06	0	0.0001394	3.20003	3	2130.92	-3.79663	32.3019	1
	High	AGGVGLNLSAASR	1	5	2	Q59GQ7;A8K5B6		0	1.62205e+08	0	8.449e-05	3.1984	2	1172.64	-2.33291	49.9654	0
	High	VFIQHITLSDEER	1	5	2	Q59GQ7;A8K5B6		0	1.83759e+07	0	0.0001394	3.06216	2	1586.81	-2.11043	58.6871	0
	High	DRPENVHGGILADDmGLGK	2	7	2	Q59GQ7;A8K5B6	M15(Oxidation)	0	1.05443e+08	0	0.0001394	3.06166	2	2009.97	-2.93578	46.2229	0
	High	NDLYYNTITNFSEK	1	7	2	Q59GQ7;A8K5B6		0	71614809	0	0.0001394	3.03312	2	1721.8	-1.94788	78.6342	0
	High	VILDEGHAIRNPNAQQTK	1	5	2	Q59GQ7;A8K5B6		0	1.04371e+07	0	0.0001394	2.98777	2	2004.06	-2.56822	36.2781	1
	High	cSEQPSISDIKEK	2	7	2	Q59GQ7;A8K5B6	C1(Carbamidomethyl)	0	7.94354e+06	0	0.000206	2.98437	2	1520.72	-3.6408	34.0633	1
	High	ENSKELPPFWEQR	1	7	2	Q59GQ7;A8K5B6		0	1.71224e+07	0	0.0001459	2.66519	2	1659.81	-3.13329	60.546	1
	High	KVFIQHITLSDEER	1	5	2	Q59GQ7;A8K5B6		0	2.71083e+07	0	0.0001537	2.65879	3	1714.91	-2.45849	46.9435	1
	High	LGGNNTSEKADGLSK	1	6	2	Q59GQ7;A8K5B6		0	1.10544e+07	0	0.0001529	2.50137	2	1490.74	-3.7163	23.272	1
	High	TLTAIAVILTNFHDGRPLPIER	1	7	2	Q59GQ7;A8K5B6		0	42024057	0	0.0001394	2.44514	4	2447.38	-0.16903	100.036	0
	High	DPNNPYDKNAIK	1	7	2	Q59GQ7;A8K5B6		0	2.74983e+07	0.002	0.01411	2.39307	3	1388.68	-3.34481	28.212	1
	High	INALmHALTDLR	1	5	2	Q59GQ7;A8K5B6	M5(Oxidation)	0	0	0.002	0.007069	2.37015	3	1383.74	-2.3151	61.0099	0
	High	LGQKQEVIITK	1	4	2	Q59GQ7;A8K5B6		0	8.65674e+06	0.002	0.0119	2.33842	2	1256.75	-2.97088	29.3057	1
	High	QALAWmVSR	1	7	2	Q59GQ7;A8K5B6	M6(Oxidation)	0	6.17584e+07	0.002	0.008613	1.97227	2	1077.55	-1.32537	51.1151	0
	High	ELAGALAYImDNK	1	7	2	Q59GQ7;A8K5B6	M10(Oxidation)	0	56235642	0.002	0.007156	1.78038	2	1424.71	2.28928	78.6615	0
	High	VILDEGHAIR	1	5	2	Q59GQ7;A8K5B6		0	3.1295e+07	0.002	0.01042	1.0554	3	1122.62	-2.68207	37.5718	0
	High	ELPPFWEQR	2	7	2	Q59GQ7;A8K5B6		0	1.29638e+08	0.003	0.01539	2.04289	2	1201.6	-2.49485	76.1369	0
	High	GKPVLELPERK	1	5	2	Q59GQ7;A8K5B6		0	1.26889e+07	0.005	0.04894	1.90119	2	1265.75	-3.03339	30.6177	1
	High	GKPVLELPER	1	5	2	Q59GQ7;A8K5B6		0	4.1441e+07	0.005	0.05415	1.31262	2	1137.66	-2.51715	42.042	0
	High	TIQRPVTmGDEGGLR	1	5	2	Q59GQ7;A8K5B6	M8(Oxidation)	0	4.42572e+07	0.005	0.05237	1.30974	3	1645.83	-2.14454	32.8576	0
	High	VNNVNGNQVGHLKK	1	7	2	Q59GQ7;A8K5B6		0	2.76498e+07	0.006	0.06484	1.5264	3	1520.82	-3.87514	21.9544	1
Q8WWM7	Ataxin-2-like protein OS=Homo sapiens OX=9606 GN=ATXN2L PE=1 SV=2 - [ATX2L_HUMAN]	86.1247	30.6	9	3	27	37	6.65218e+08	1075	113.304	8.5874
	A2	Sequence	# PSMs	# Proteins	# Protein Groups	Protein Group Accessions	Modifications	ΔCn	Area	q-Value	PEP	XCorr	Charge	MH+ [Da]	ΔM [ppm]	RT [min]	# Missed Cleavages
	High	GQSTGKGPPQSPVFEGVYNNSR	1	2	2	Q8WWM7;H3BUF6		0	2.78969e+07	0	3.69e-06	4.80169	3	2306.11	-3.55926	51.3488	1
	High	IAmENDDGRTEEEKHSAVQR	2	6	2	Q8WWM7;H3BUF6	M3(Oxidation)	0	1.16733e+08	0	0.0002445	4.25077	3	2331.06	-2.80714	21.9765	2
	High	GPPQSPVFEGVYNNSR	1	3	2	Q8WWM7;H3BUF6		0	2.83692e+08	0	0.0001045	4.09958	2	1747.84	-2.0952	63.6434	0
	High	REDIVDTmVFKPSDVmLVHFR	3	8	2	Q8WWM7;H3BUF6	M8(Oxidation); M16(Oxidation)	0	2.28169e+08	0	0.0001394	3.97912	4	2566.27	-2.16535	81.3939	1
	High	mLHFLTAVVGSTcDVK	2	7	2	Q8WWM7;H3BUF6	M1(Oxidation); C13(Carbamidomethyl)	0	6.40918e+07	0	1.929e-06	3.88827	2	1793.89	-1.92577	73.3768	0
	High	EVDGLLTSEPmGSPVSSK	2	5	2	Q8WWM7;H3BUF6	M11(Oxidation)	0	6.70069e+07	0	0.0001394	3.87761	2	1848.89	-1.9484	66.7268	0
	High	TLSSKFELAVDAVHR	1	8	2	Q8WWM7;H3BUF6		0	3.15121e+07	0	0.000169	3.69623	3	1672.9	-1.89944	59.6827	1
	High	GPHHLDNSSPGPGSEAR	2	5	2	Q8WWM7;H3BUF6		0	1.40914e+08	0	0.0001394	3.56273	2	1714.78	-3.2204	21.319	0
	High	GEDKDEGPVAEQVKK	1	5	2	Q8WWM7;H3BUF6		0	1.66638e+07	0	0.0001534	3.37857	2	1628.81	-2.19281	22.4203	2
	High	TTYDSSLSSYTVPLEK	1	6	2	Q8WWM7;H3BUF6		0	151389799	0	1.865e-05	3.19304	2	1790.87	-2.28228	77.1468	0
	High	DKFTDSAIAmNSK	1	7	2	Q8WWM7;H3BUF6	M10(Oxidation)	0	1.61406e+08	0	0.0001394	3.12333	2	1443.67	-2.86235	33.8012	1
	High	FELAVDAVHR	1	8	2	Q8WWM7;H3BUF6		0	6.8609e+07	0	0.0001394	3.08103	3	1156.61	-2.42334	54.9104	0
	High	AEGLQVGQDAR	1	4	1	Q8WWM7		0	3.72528e+07	0	0.0001394	2.9502	2	1143.57	-3.18164	30.9104	0
	High	EFNPTKPLLSVNK	2	5	2	Q8WWM7;H3BUF6		0	2.79552e+08	0	0.0001394	2.88199	2	1486.82	-2.96082	60.7075	0
	High	IAGKVPGLQNEQK	1	5	2	Q8WWM7;H3BUF6		0	6.03225e+07	0	0.00144	2.60626	3	1381.78	-2.72485	30.6283	1
	High	LQPSSSPENSLDPFPPR	3	5	2	Q8WWM7;H3BUF6		0	1.66518e+08	0	0.003449	2.59001	2	1867.91	-2.24692	73.516	0
	High	IAGKVPGLQNEQKR	1	5	2	Q8WWM7;H3BUF6		0	2.51592e+07	0.001	0.007069	2.70909	3	1537.88	-3.19242	25.9527	2
	High	TLSSPSNRPSGETSVPPPPAVGR	1	4	1	Q8WWM7		0	8.86951e+08	0.001	0.007069	2.44646	3	2290.17	-2.03736	49.0166	0
	High	RFQLEELRK	1	5	2	Q8WWM7;H3BUF6		0	5.58353e+07	0.002	0.007991	2.63763	3	1218.69	-3.06663	33.2178	2
	High	VPGLQNEQK	1	5	2	Q8WWM7;H3BUF6		0	69500004	0.002	0.009591	2.50337	2	1012.54	-2.54003	26.4503	0
	High	FNEENYGVK	1	6	2	Q8WWM7;H3BUF6		0	1.96517e+08	0.002	0.007069	2.32741	2	1099.5	-3.18378	34.1246	0
	High	FQLEELRK	1	5	2	Q8WWM7;H3BUF6		0	9.0486e+07	0.002	0.01455	2.21432	3	1062.59	-2.26781	42.4347	1
	High	TLEPQELAR	2	5	2	Q8WWM7;H3BUF6		0	310775240	0.002	0.01197	1.57091	2	1056.57	-2.35265	43.4817	0
	High	EFSLAGGIWHGR	1	4	1	Q8WWM7		0	1.01267e+07	0.002	0.0114	1.43912	3	1329.67	-0.930315	69.6938	0
	High	ISLAPTDVK	1	5	2	Q8WWM7;H3BUF6		0	2.3762e+08	0.003	0.02161	1.59423	2	943.543	-2.75533	47.5112	0
	High	EKEVDGLLTSEPmGSPVSSK	1	5	2	Q8WWM7;H3BUF6	M13(Oxidation)	0	1.65541e+07	0.004	0.03338	1.4459	2	2106.03	-0.259908	57.4751	1
	High	GAEGILAPQPPPPQQHQERPGAAAIGSAR	1	2	2	Q8WWM7;H3BUF6		0	7.97928e+08	0.006	0.05925	1.88143	4	2901.5	-2.78224	52.3057	0
P35251	Replication factor C subunit 1 OS=Homo sapiens OX=9606 GN=RFC1 PE=1 SV=4 - [RFC1_HUMAN]	84.8005	26.22	8	24	24	32	1.04637e+08	1148	128.175	9.36377
	A2	Sequence	# PSMs	# Proteins	# Protein Groups	Protein Group Accessions	Modifications	ΔCn	Area	q-Value	PEP	XCorr	Charge	MH+ [Da]	ΔM [ppm]	RT [min]	# Missed Cleavages
	High	NLADDSSENKVENLLWVDKYKPTSLK	1	2	1	P35251		0	16485338	0	0.0001394	4.84506	3	3006.53	-2.92864	81.3523	2
	High	NLADDSSENKVENLLWVDK	2	2	1	P35251		0	7.13569e+07	0	1.091e-05	4.18926	2	2189.07	-2.72335	85.3895	1
	High	SLDFKEQVAEETSGDSK	1	2	1	P35251		0	20657165	0	5.81e-07	4.15374	2	1869.87	-2.58234	52.6876	1
	High	IIDEDGLLNLIR	1	3	1	P35251		0	9.06195e+07	0	2.588e-05	3.80872	2	1383.78	-2.24441	100.527	0
	High	ELSQNTDESGLNDEAIAK	1	3	1	P35251		0	7.45658e+06	0	0.0001234	3.53974	2	1933.9	-1.26456	53.0404	0
	High	IPPPAmNEIILGANQDIR	2	1	1	P35251	M6(Oxidation)	0	3.7425e+07	0	0.0001394	3.52088	3	1978.04	-3.50628	77.3121	0
	High	GFYSNGAASSVSTK	1	2	1	P35251		0	4.10053e+07	0	0.0001394	3.31814	2	1375.65	-2.6839	36.9034	0
	High	AADSIcDGDLVDSQIR	1	1	1	P35251	C6(Carbamidomethyl)	0	28455085	0	6.486e-05	3.26718	2	1734.79	-2.15885	68.1933	0
	High	KPPEKLPVSSKPGK	3	3	1	P35251		0	3.87184e+07	0	0.0009571	3.03541	2	1491.89	-2.35235	22.0585	1
	High	TVNmDYLSLLR	2	1	1	P35251	M4(Oxidation)	0	3.7015e+07	0	0.0001425	2.83548	2	1340.69	-1.36762	84.7249	0
	High	AYNKEAHLTPYSLQAIK	1	2	1	P35251		0	1.38175e+07	0	0.0001402	2.81851	3	1947.03	-2.07403	50.1656	1
	High	IVQDLALHmSLR	1	1	1	P35251	M9(Oxidation)	0	2.04931e+07	0	0.0001394	2.76112	2	1411.77	-3.13807	51.8234	0
	High	KVFAAGEETAHmSLVDK	1	1	1	P35251	M12(Oxidation)	0	8082762	0	0.0001394	2.71437	3	1848.91	-4.00276	36.3939	1
	High	TLAmLDEEPK	1	3	1	P35251	M4(Oxidation)	0	37270885	0	0.0002958	2.61732	2	1162.56	-2.30887	42.4986	0
	High	AALLSGPPGVGK	2	1	1	P35251		0	142914507	0	0.002798	2.55455	2	1066.62	-2.45532	53.8498	0
	High	EAHLTPYSLQAIK	2	2	1	P35251		0	8.03759e+07	0	0.0001394	2.52963	3	1470.79	-1.7097	58.03	0
	High	QNWSLLPAQAIYASVLPGELmR	1	1	1	P35251	M21(Oxidation)	0	4.92881e+06	0	0.001104	2.2124	3	2473.29	-2.01492	101.965	0
	High	SLVHYcFDLR	2	1	1	P35251	C6(Carbamidomethyl)	0	1.73325e+07	0	0.001148	2.04618	3	1309.63	-2.70189	63.0845	0
	High	SSADKIGEVSSPK	1	3	1	P35251		0	28246008	0.001	0.005575	2.83957	2	1304.67	-2.76261	25.8476	1
	High	SKYEIAVETEmKK	1	1	1	P35251	M11(Oxidation)	0	1.79814e+07	0.002	0.007476	3.05876	2	1571.8	-1.45951	27.0636	2
	High	EGLKIPPPAmNEIILGANQDIR	1	1	1	P35251	M10(Oxidation)	0	11775980	0.002	0.008909	2.44979	3	2405.28	-2.73411	84.8707	1
	High	mGPFDVAR	1	1	1	P35251	M1(Oxidation)	0	7.37015e+07	0.002	0.007069	2.3204	2	908.428	-1.7186	43.9444	0
	High	HLmLLSR	1	1	1	P35251	M3(Oxidation)	0	65885641	0.005	0.04984	1.7057	2	885.495	-2.59796	31.6366	0
	High	QLHEDEEFAR	1	4	1	P35251		0	2.65613e+07	0.008	0.08977	1.45581	2	1273.58	-3.12621	27.8159	0
P36578	60S ribosomal protein L4 OS=Homo sapiens OX=9606 GN=RPL4 PE=1 SV=5 - [RL4_HUMAN]	82.6163	38.41	10	24	24	37	6.29476e+08	427	47.6674	11.063
	A2	Sequence	# PSMs	# Proteins	# Protein Groups	Protein Group Accessions	Modifications	ΔCn	Area	q-Value	PEP	XCorr	Charge	MH+ [Da]	ΔM [ppm]	RT [min]	# Missed Cleavages
	High	GHRIEEVPELPLVVEDKVEGYK	2	6	1	P36578		0	3.35612e+07	0	0.0001394	4.14547	3	2535.34	-2.07792	76.0798	2
	High	NNRQPYAVSELAGHQTSAESWGTGR	2	8	1	P36578		0	212309459	0	1.253e-05	4.10159	3	2716.27	-2.85723	54.2415	1
	High	IEEVPELPLVVEDKVEGYKK	2	6	1	P36578		0	6.68264e+08	0	0.0001394	3.67328	4	2313.25	-2.0007	83.6986	2
	High	VDKAAAAAAALQAK	1	5	1	P36578		0	88737614	0	0.0001394	3.47498	3	1298.74	-2.15436	35.1557	1
	High	RGPcIIYNEDNGIIK	2	7	1	P36578	C4(Carbamidomethyl)	0	2.34531e+08	0	0.0001394	3.30106	2	1761.89	-3.18366	57.6575	1
	High	APIRPDIVNFVHTNLR	3	7	1	P36578		0	4.71926e+08	0	0.0001394	3.15104	3	1862.03	-2.5709	72.96	0
	High	AAAAAAALQAK	1	5	1	P36578		0	490659314	0	0.0001394	2.95693	2	956.55	-2.11144	27.1337	0
	High	GPcIIYNEDNGIIK	1	7	1	P36578	C3(Carbamidomethyl)	0	5.24974e+07	0	0.0001394	2.81007	2	1605.79	-3.3126	70.0177	0
	High	KNNRQPYAVSELAGHQTSAESWGTGR	1	8	1	P36578		0	2.45225e+06	0	0.00112	2.77113	3	2844.37	-2.10602	46.6276	2
	High	QPYAVSELAGHQTSAESWGTGR	2	8	1	P36578		0	317228051	0	0.0001394	2.57797	3	2332.09	-2.29465	62.8064	0
	High	FcIWTESAFR	2	5	1	P36578	C2(Carbamidomethyl)	0	157314773	0	0.0001394	2.56933	2	1316.61	-2.20602	86.2483	0
	High	LDELYGTWR	1	6	1	P36578		0	1.84359e+07	0	0.0002025	2.53867	2	1152.57	-2.78349	66.2478	0
	High	KLDELYGTWR	2	6	1	P36578		0	2.8531e+08	0	0.000376	2.35877	2	1280.66	-2.21857	56.066	1
	High	NIPGITLLNVSK	2	6	1	P36578		0	5.42396e+08	0	0.0001877	1.99133	2	1268.75	-2.3655	86.9173	0
	High	APIRPDIVNFVHTNLRK	2	7	1	P36578		0	677766099	0.001	0.007069	2.32852	4	1990.13	-2.77986	62.4733	1
	High	TKEAVLLLK	2	7	1	P36578		0	1.16233e+08	0.001	0.00411	2.31873	2	1014.65	-3.8518	38.1213	1
	High	KLDELYGTWRK	2	6	1	P36578		0	16264450	0.001	0.005408	2.01302	2	1408.75	-2.4496	43.3809	2
	High	ILKSPEIQR	1	6	1	P36578		0	1.46797e+08	0.002	0.007069	2.18323	3	1083.65	-2.55123	28.9075	1
	High	SNYNLPmHK	1	5	1	P36578	M7(Oxidation)	0	2.04537e+08	0.002	0.007162	2.01891	2	1119.52	-2.06477	24.3449	0
	High	NVTLPAVFKAPIRPDIVNFVHTNLRK	1	7	1	P36578		0	3.95199e+07	0.002	0.007137	1.74973	4	2959.69	-1.9864	92.7304	2
	High	IEEVPELPLVVEDKVEGYK	1	6	1	P36578		0	100834374	0.002	0.01313	1.36497	3	2185.16	-1.83284	95.047	1
	High	TKEAVLLLKK	1	7	1	P36578		0	2.9264e+07	0.003	0.02087	1.74363	2	1142.75	-2.77849	27.4872	2
	High	EAVLLLKK	1	7	1	P36578		0	81697693	0.005	0.04681	2.13108	2	913.606	-2.79543	35.8316	1
	High	IEEVPELPLVVEDK	1	6	1	P36578		0	9.07604e+07	0.008	0.09011	1.86411	2	1608.87	-1.79284	96.3186	0
H3BUF6	Ataxin-2-like protein OS=Homo sapiens OX=9606 GN=ATXN2L PE=1 SV=1 - [H3BUF6_HUMAN]	80.728	29.21	4	1	25	35	4.64132e+08	1068	112.644	8.68994
	A2	Sequence	# PSMs	# Proteins	# Protein Groups	Protein Group Accessions	Modifications	ΔCn	Area	q-Value	PEP	XCorr	Charge	MH+ [Da]	ΔM [ppm]	RT [min]	# Missed Cleavages
	High	GQSTGKGPPQSPVFEGVYNNSR	1	2	2	Q8WWM7;H3BUF6		0	2.78969e+07	0	3.69e-06	4.80169	3	2306.11	-3.55926	51.3488	1
	High	IAmENDDGRTEEEKHSAVQR	2	6	2	Q8WWM7;H3BUF6	M3(Oxidation)	0	1.16733e+08	0	0.0002445	4.25077	3	2331.06	-2.80714	21.9765	2
	High	GPPQSPVFEGVYNNSR	1	3	2	Q8WWM7;H3BUF6		0	2.83692e+08	0	0.0001045	4.09958	2	1747.84	-2.0952	63.6434	0
	High	REDIVDTmVFKPSDVmLVHFR	3	8	2	Q8WWM7;H3BUF6	M8(Oxidation); M16(Oxidation)	0	2.28169e+08	0	0.0001394	3.97912	4	2566.27	-2.16535	81.3939	1
	High	mLHFLTAVVGSTcDVK	2	7	2	Q8WWM7;H3BUF6	M1(Oxidation); C13(Carbamidomethyl)	0	6.40918e+07	0	1.929e-06	3.88827	2	1793.89	-1.92577	73.3768	0
	High	EVDGLLTSEPmGSPVSSK	2	5	2	Q8WWM7;H3BUF6	M11(Oxidation)	0	6.70069e+07	0	0.0001394	3.87761	2	1848.89	-1.9484	66.7268	0
	High	TLSSKFELAVDAVHR	1	8	2	Q8WWM7;H3BUF6		0	3.15121e+07	0	0.000169	3.69623	3	1672.9	-1.89944	59.6827	1
	High	GPHHLDNSSPGPGSEAR	2	5	2	Q8WWM7;H3BUF6		0	1.40914e+08	0	0.0001394	3.56273	2	1714.78	-3.2204	21.319	0
	High	GEDKDEGPVAEQVKK	1	5	2	Q8WWM7;H3BUF6		0	1.66638e+07	0	0.0001534	3.37857	2	1628.81	-2.19281	22.4203	2
	High	TTYDSSLSSYTVPLEK	1	6	2	Q8WWM7;H3BUF6		0	151389799	0	1.865e-05	3.19304	2	1790.87	-2.28228	77.1468	0
	High	DKFTDSAIAmNSK	1	7	2	Q8WWM7;H3BUF6	M10(Oxidation)	0	1.61406e+08	0	0.0001394	3.12333	2	1443.67	-2.86235	33.8012	1
	High	FELAVDAVHR	1	8	2	Q8WWM7;H3BUF6		0	6.8609e+07	0	0.0001394	3.08103	3	1156.61	-2.42334	54.9104	0
	High	EFNPTKPLLSVNK	2	5	2	Q8WWM7;H3BUF6		0	2.79552e+08	0	0.0001394	2.88199	2	1486.82	-2.96082	60.7075	0
	High	IAGKVPGLQNEQK	1	5	2	Q8WWM7;H3BUF6		0	6.03225e+07	0	0.00144	2.60626	3	1381.78	-2.72485	30.6283	1
	High	LQPSSSPENSLDPFPPR	3	5	2	Q8WWM7;H3BUF6		0	1.66518e+08	0	0.003449	2.59001	2	1867.91	-2.24692	73.516	0
	High	IAGKVPGLQNEQKR	1	5	2	Q8WWM7;H3BUF6		0	2.51592e+07	0.001	0.007069	2.70909	3	1537.88	-3.19242	25.9527	2
	High	RFQLEELRK	1	5	2	Q8WWM7;H3BUF6		0	5.58353e+07	0.002	0.007991	2.63763	3	1218.69	-3.06663	33.2178	2
	High	VPGLQNEQK	1	5	2	Q8WWM7;H3BUF6		0	69500004	0.002	0.009591	2.50337	2	1012.54	-2.54003	26.4503	0
	High	FNEENYGVK	1	6	2	Q8WWM7;H3BUF6		0	1.96517e+08	0.002	0.007069	2.32741	2	1099.5	-3.18378	34.1246	0
	High	FQLEELRK	1	5	2	Q8WWM7;H3BUF6		0	9.0486e+07	0.002	0.01455	2.21432	3	1062.59	-2.26781	42.4347	1
	High	TLSSPSNRPSGETSVPPPPAAPPFLPVGR	1	1	1	H3BUF6		0	60877941	0.002	0.008016	1.82106	3	2912.52	-3.32716	83.4756	0
	High	TLEPQELAR	2	5	2	Q8WWM7;H3BUF6		0	310775240	0.002	0.01197	1.57091	2	1056.57	-2.35265	43.4817	0
	High	ISLAPTDVK	1	5	2	Q8WWM7;H3BUF6		0	2.3762e+08	0.003	0.02161	1.59423	2	943.543	-2.75533	47.5112	0
	High	EKEVDGLLTSEPmGSPVSSK	1	5	2	Q8WWM7;H3BUF6	M13(Oxidation)	0	1.65541e+07	0.004	0.03338	1.4459	2	2106.03	-0.259908	57.4751	1
	High	GAEGILAPQPPPPQQHQERPGAAAIGSAR	1	2	2	Q8WWM7;H3BUF6		0	7.97928e+08	0.006	0.05925	1.88143	4	2901.5	-2.78224	52.3057	0
A0A024R566	Splicing factor 1, isoform CRA_a OS=Homo sapiens OX=9606 GN=SF1 PE=3 SV=1 - [A0A024R566_HUMAN]	80.3508	36.25	11	15	16	33	7.90751e+08	571	61.85	9.27588
	A2	Sequence	# PSMs	# Proteins	# Protein Groups	Protein Group Accessions	Modifications	ΔCn	Area	q-Value	PEP	XCorr	Charge	MH+ [Da]	ΔM [ppm]	RT [min]	# Missed Cleavages
	High	VSDKVmIPQDEYPEINFVGLLIGPR	2	7	1	A0A024R566	M6(Oxidation)	0	591898110	0	6.165e-08	5.72547	3	2845.48	-1.29485	101.373	1
	High	HNLITEmVALNPDFKPPADYKPPATR	2	5	1	A0A024R566	M7(Oxidation)	0	799057368	0	3.812e-06	4.4372	4	2951.5	-2.17869	74.3811	0
	High	DGQmLPGEDEPLHALVTANTmENVK	1	7	1	A0A024R566	M4(Oxidation); M21(Oxidation)	0	65050234	0	3.199e-06	4.40604	3	2741.27	-2.68289	83.344	0
	High	GGDGPSHESEDFPRPLVTLPGR	2	2	1	A0A024R566		0	1.13298e+08	0	0.0001028	3.71445	3	2320.12	-3.24578	67.4355	0
	High	AYIVQLQIEDLTR	2	6	1	A0A024R566		0	3.78178e+08	0	6.179e-05	3.53659	2	1561.86	-1.43581	97.7366	0
	High	YAcGLWGLSPASR	2	3	2	H7C0N4;A0A024R566	C3(Carbamidomethyl)	0	1.77482e+08	0	0.0001394	3.2077	2	1437.69	-2.39254	76.505	0
	High	TVIPGmPTVIPPGLTR	8	8	1	A0A024R566	M6(Oxidation)	0	540483744	0	0.003144	3.08212	3	1664.94	-2.21304	87.3704	0
	High	EQERAYIVQLQIEDLTR	1	6	1	A0A024R566		0	7711284	0	0.0001394	2.7569	3	2104.1	-1.57812	87.898	1
	High	ILRPWQSSETR	3	7	1	A0A024R566		0	9.22973e+08	0	0.0001394	2.71814	3	1372.73	-2.25435	35.9849	0
	High	DGQmLPGEDEPLHALVTANTmENVKK	2	7	1	A0A024R566	M4(Oxidation); M21(Oxidation)	0	2.60366e+08	0	0.003638	2.41799	4	2869.36	-2.14214	72.3649	1
	High	FQRPGDPQSAQDK	2	8	1	A0A024R566		0	2.23387e+08	0.002	0.007069	2.63728	2	1473.71	-1.39038	24.3813	0
	High	QGIETPEDQNDLRK	2	7	1	A0A024R566		0	6.50223e+08	0.002	0.007069	2.19628	2	1642.8	-2.69519	34.0576	1
	High	QGIETPEDQNDLR	1	7	1	A0A024R566		0	3.78084e+07	0.002	0.008469	1.97564	2	1514.71	-0.344687	44.0174	0
	High	QPQQRPWWTGWFGK	1	2	1	A0A024R566		0	3.08785e+07	0.003	0.02443	1.71458	3	1801.89	-1.43724	86.5442	0
	High	VmIPQDEYPEINFVGLLIGPR	1	7	1	A0A024R566	M2(Oxidation)	0	5.83387e+07	0.006	0.06165	2.28933	3	2416.25	-2.02224	102.884	0
	High	SITNTTVcTK	1	7	1	A0A024R566	C8(Carbamidomethyl)	0	2.33923e+08	0.008	0.09438	1.55321	2	1124.56	-2.55378	26.4519	0
Q59H57	Fusion (Involved in t(12;16) in malignant liposarcoma) isoform a variant (Fragment) OS=Homo sapiens OX=9606 PE=2 SV=1 - [Q59H57_HUMAN]	79.1456	40	8	8	10	30	1.75505e+09	300	31.9743	9.5249
	A2	Sequence	# PSMs	# Proteins	# Protein Groups	Protein Group Accessions	Modifications	ΔCn	Area	q-Value	PEP	XCorr	Charge	MH+ [Da]	ΔM [ppm]	RT [min]	# Missed Cleavages
	High	AAIDWFDGKEFSGNPIK	7	8	1	Q59H57		0	2.49922e+09	0	1.07e-05	4.31659	2	1894.93	-3.46389	89.3395	1
	High	HDSEQDNSDNNTIFVQGLGENVTIESVADYFK	3	6	1	Q59H57		0	4.23287e+08	0	0.0001394	4.28826	3	3585.61	-3.43904	109.19	0
	High	LKGEATVSFDDPPSAK	6	8	1	Q59H57		0	1.85137e+09	0	0.0001252	3.53299	3	1661.83	-2.35802	44.7441	1
	High	KTGQPmINLYTDRETGK	3	8	1	Q59H57	M6(Oxidation)	0	1.11944e+08	0	0.0001394	3.09837	3	1967.98	-2.459	34.876	2
	High	TGQPmINLYTDRETGK	3	8	1	Q59H57	M5(Oxidation)	0	8.38369e+08	0	0.0001394	2.72108	2	1839.89	0.229638	44.8446	1
	High	cPNPTcENmNFSWR	1	7	1	Q59H57	C1(Carbamidomethyl); C6(Carbamidomethyl); M9(Oxidation)	0	1.88624e+08	0	0.0001394	2.67327	2	1828.71	-3.02899	55.676	0
	High	APKPDGPGGGPGGSHmGGNYGDDR	3	7	1	Q59H57	M16(Oxidation)	0	914553864	0	0.0001394	2.54472	4	2268.96	-2.3335	23.7264	0
	High	TGQPmINLYTDR	2	8	1	Q59H57	M5(Oxidation)	0	5.7932e+08	0	0.0002961	2.50313	2	1424.68	-2.32102	54.6333	0
	High	AAIDWFDGK	1	11	2	Q59H57;Q92804		0	5.04867e+08	0	0.002582	2.44848	2	1022.49	-1.11659	71.9081	0
	High	GEATVSFDDPPSAK	1	11	2	Q59H57;Q92804		0	9.10543e+08	0	0.0001394	2.33193	2	1420.66	-2.25946	48.8254	0
Q53HH4	Ras-GTPase-activating protein SH3-domain-binding protein variant (Fragment) OS=Homo sapiens OX=9606 PE=2 SV=1 - [Q53HH4_HUMAN]	78.1432	42.27	12	12	12	33	3.52122e+08	466	52.106	5.59229
	A2	Sequence	# PSMs	# Proteins	# Protein Groups	Protein Group Accessions	Modifications	ΔCn	Area	q-Value	PEP	XCorr	Charge	MH+ [Da]	ΔM [ppm]	RT [min]	# Missed Cleavages
	High	LPNFGFVVFDDSEPVQK	2	5	1	Q53HH4		0	1.57586e+08	0	8.507e-07	4.27127	2	1937.96	-1.97755	100.681	0
	High	HPDSHQLFIGNLPHEVDKSELK	3	6	1	Q53HH4		0	3.71393e+08	0	0.0001394	4.16492	4	2540.27	-5.71211	58.0863	1
	High	NSSYVHGGLDSNGKPADAVYGQK	2	10	1	Q53HH4		0	2.66505e+08	0	2.732e-06	4.16362	3	2364.12	-2.01635	39.6717	0
	High	SSSPAPADIAQTVQEDLR	4	5	1	Q53HH4		0	1.69403e+08	0	2.01e-06	3.91376	2	1884.93	-2.45782	87.286	0
	High	VPASQPRPESKPESQIPPQRPQR	6	4	1	Q53HH4		0	32666196	0	0.003349	3.68744	3	2609.38	-2.52622	29.4618	0
	High	VmSQNFTNcHTK	1	9	1	Q53HH4	M2(Oxidation); C9(Carbamidomethyl)	0	9.05297e+06	0	0.0001437	2.98756	2	1482.64	-2.91564	22.0698	0
	High	NLPPSGAVPVTGIPPHVVK	5	5	1	Q53HH4		0	7.02969e+06	0	0.002018	2.77488	2	1879.07	-2.71013	69.3014	0
	High	FmQTFVLAPEGSVANK	1	5	1	Q53HH4	M2(Oxidation)	0	152466246	0	0.003199	2.76792	2	1754.86	-7.89167	74.2256	0
	High	FYVHNDIFR	4	5	1	Q53HH4		0	233322691	0	0.0005801	2.0921	3	1210.6	-2.18889	56.4955	0
	High	TFSWASVTSK	2	5	1	Q53HH4		0	4.18467e+08	0.001	0.007069	2.12868	2	1113.55	-2.62966	60.9029	0
	High	DFFQSYGNVVELR	1	6	1	Q53HH4		0	104703	0.002	0.007069	2.94958	2	1573.76	-2.95852	117.228	0
	High	QYYTLLNQAPDmLHR	2	10	1	Q53HH4	M12(Oxidation)	0	2.41198e+08	0.002	0.01126	2.17162	2	1878.91	-6.01584	66.4493	0
P26196	Probable ATP-dependent RNA helicase DDX6 OS=Homo sapiens OX=9606 GN=DDX6 PE=1 SV=2 - [DDX6_HUMAN]	77.7742	54.66	20	18	18	29	4.46039e+08	483	54.3823	8.66064
	A2	Sequence	# PSMs	# Proteins	# Protein Groups	Protein Group Accessions	Modifications	ΔCn	Area	q-Value	PEP	XCorr	Charge	MH+ [Da]	ΔM [ppm]	RT [min]	# Missed Cleavages
	High	SLYVAEYHSEPVEDEKP	1	2	1	P26196		0	1.52192e+08	0	9.135e-08	4.25282	2	1991.92	-2.36686	54.6315	0
	High	SIEEQLGTEIKPIPSNIDK	2	2	1	P26196		0	6.56921e+08	0	0.0001375	4.10611	2	2111.12	-2.10379	75.9138	0
	High	TENPVImGLSSQNGQLR	3	2	1	P26196	M7(Oxidation)	0	28695407	0	4.225e-07	3.85588	2	1859.93	-0.617669	65.8445	0
	High	TSDVTSTKGNEFEDYcLKR	1	3	1	P26196	C16(Carbamidomethyl)	0	1.69158e+07	0	0.0001394	3.73095	3	2250.03	-1.54103	45.5153	2
	High	GPVKPTGGPGGGGTQTQQQmNQLK	2	3	1	P26196	M20(Oxidation)	0	343185929	0	1.937e-06	3.644	3	2382.18	-2.03111	27.2909	0
	High	LDDTVHVVIATPGR	3	2	1	P26196		0	2.61815e+08	0	0.0001394	3.47191	3	1492.81	-2.81982	60.5426	0
	High	NTNTINNGTQQQAQSmTTTIKPGDDWKK	2	3	1	P26196	M16(Oxidation)	0	1.18812e+08	0	0.001259	3.43932	3	3136.49	-2.63095	41.9318	1
	High	FmNSHLQKPYEINLmEELTLK	2	2	1	P26196	M2(Oxidation); M15(Oxidation)	0	3.52557e+07	0	0.0006231	3.36551	3	2610.29	-1.16362	75.6361	0
	High	FGHLGLAINLITYDDRFNLK	1	2	1	P26196		0	27804485	0	1.6e-05	3.18862	3	2320.24	-1.97899	98.8189	1
	High	SGAYLIPLLER	2	3	1	P26196		0	3.3801e+08	0	0.0009101	2.97433	2	1231.7	-1.61488	93.8704	0
	High	GNEFEDYcLKR	3	3	1	P26196	C8(Carbamidomethyl)	0	3.39729e+07	0	0.001513	2.11617	2	1430.63	-1.91693	43.8303	1
	High	DNIQAmVIVPTR	1	3	1	P26196	M6(Oxidation)	0	1.02963e+08	0.001	0.007069	2.5113	2	1372.72	-1.77626	63.519	0
	High	GVTQYYAYVTER	1	2	1	P26196		0	1.55416e+08	0.001	0.007069	2.26738	2	1449.7	-1.71032	66.3633	0
	High	LDLKKDNIQAmVIVPTR	1	3	1	P26196	M11(Oxidation)	0	9.32931e+06	0.001	0.005035	1.96117	3	1970.11	-2.58692	62.3081	2
	High	ELLmGIFEmGWEKPSPIQEESIPIALSGR	1	3	1	P26196	M4(Oxidation); M9(Oxidation)	0	4.03458e+07	0.002	0.007069	2.94994	3	3289.64	-1.62319	100.979	0
	High	ILDLIK	1	19	1	P26196		0	5.67965e+07	0.002	0.007069	1.66955	2	714.475	-1.42498	61.133	0
	High	GNEFEDYcLK	1	3	1	P26196	C8(Carbamidomethyl)	0	8.14818e+06	0.002	0.01051	1.64087	2	1274.53	-2.59468	55.7729	0
	High	TLKLPPKDLR	1	3	1	P26196		0	0	0.004	0.03677	1.61436	3	1180.74	-1.76236	32.9324	2
Q8ND56	Protein LSM14 homolog A OS=Homo sapiens OX=9606 GN=LSM14A PE=1 SV=3 - [LS14A_HUMAN]	76.6407	38.66	11	18	19	37	7.0054e+08	463	50.4991	9.5249
	A2	Sequence	# PSMs	# Proteins	# Protein Groups	Protein Group Accessions	Modifications	ΔCn	Area	q-Value	PEP	XCorr	Charge	MH+ [Da]	ΔM [ppm]	RT [min]	# Missed Cleavages
	High	YEGILYTIDTENSTVALAK	2	4	1	Q8ND56		0	1.53852e+08	0	8.44e-08	4.59046	3	2101.07	0.275808	97.119	0
	High	DFDFESANAQFNKEEIDR	2	3	1	Q8ND56		0	5.48346e+08	0	2.596e-06	3.97759	2	2174.96	-2.0993	78.4597	1
	High	SPTmEQAVQTASAHLPAPAAVGR	2	1	1	Q8ND56	M4(Oxidation)	0	136527448	0	1.288e-05	3.77367	3	2306.15	-1.51698	62.7345	0
	High	DFDFESANAQFNKEEIDREFHNK	2	3	1	Q8ND56		0	3.85536e+08	0	0.002844	3.67741	3	2830.26	-3.8497	76.004	2
	High	SFGTEDRPTDRPIPPRDEVFEYIIFR	6	4	1	Q8ND56		0	1.04662e+09	0	0.0002422	3.53559	4	3152.58	-0.897706	92.8981	1
	High	VSRPENEQLRNDNKR	3	3	1	Q8ND56		0	7.38512e+07	0	0.002442	3.21617	2	1854.95	-2.26596	20.102	2
	High	AEIRYEGILYTIDTENSTVALAK	5	4	1	Q8ND56		0	4.81492e+06	0	0.0001394	2.64593	3	2570.33	-1.06361	97.3179	1
	High	KSPTmEQAVQTASAHLPAPAAVGR	2	1	1	Q8ND56	M5(Oxidation)	0	147692479	0	0.0001863	2.56976	3	2434.25	-2.21415	53.1446	1
	High	SFFDNIScDDNR	1	4	1	Q8ND56	C8(Carbamidomethyl)	0	173737716	0	0.0001394	2.43407	2	1489.6	-1.34569	68.6967	0
	High	RPTWAEER	2	4	1	Q8ND56		0	5.06653e+08	0.001	0.007069	2.40217	3	1044.52	-2.08579	23.4831	0
	High	VSRPENEQLR	1	3	1	Q8ND56		0	4.21011e+08	0.001	0.007069	2.11214	3	1227.64	-2.11639	22.7206	0
	High	EFADFEYR	1	4	1	Q8ND56		0	4.8878e+08	0.001	0.006737	2.09362	2	1076.47	-2.57094	61.5242	0
	High	EFADFEYRK	1	2	1	Q8ND56		0	1.75449e+08	0.001	0.007069	1.23153	3	1204.56	-1.54807	44.5486	1
	High	RPTWAEERR	1	4	1	Q8ND56		0	2.31802e+06	0.002	0.01184	2.00198	2	1200.62	-3.01077	21.5719	1
	High	SLKTQLSQGR	1	1	1	Q8ND56		0	8.34793e+06	0.002	0.007069	1.96426	3	1117.63	-2.28596	23.8579	1
	High	SPVSTRPLPSASQK	2	1	1	Q8ND56		0	8.28969e+07	0.003	0.02201	1.82961	2	1454.79	-2.54554	27.9822	0
	High	ISLISK	1	16	3	D6W539;Q8ND56;Q9BX40		0	2.70714e+08	0.003	0.02528	1.52372	2	660.428	-2.24465	35.2216	0
	High	SFFDNIScDDNRER	1	4	1	Q8ND56	C8(Carbamidomethyl)	0	4.39705e+06	0.003	0.01819	1.1296	3	1774.74	-3.43123	59.9088	1
	High	KTTAFGP	1	1	1	Q8ND56		0	9.90698e+06	0.007	0.07272	1.34995	2	721.387	-1.30417	27.3614	1
D6RI06	Ubiquitinyl hydrolase 1 (Fragment) OS=Homo sapiens OX=9606 GN=OTUD4 PE=1 SV=1 - [D6RI06_HUMAN]	75.5111	50	2	1	18	26	3.35622e+08	372	42.1071	7.54736
	A2	Sequence	# PSMs	# Proteins	# Protein Groups	Protein Group Accessions	Modifications	ΔCn	Area	q-Value	PEP	XCorr	Charge	MH+ [Da]	ΔM [ppm]	RT [min]	# Missed Cleavages
	High	FLNADVQGIHSENGPVLVEELGKK	2	2	2	Q01804;D6RI06		0	3.44704e+08	0	2.918e-06	4.86982	3	2593.35	-3.348	78.6576	1
	High	DFIIYREPNVSPSQVTENNFPEK	2	3	2	Q01804;D6RI06		0	260428161	0	7.784e-07	4.85611	3	2723.32	-2.67819	88.3372	1
	High	FLNADVQGIHSENGPVLVEELGK	2	2	2	Q01804;D6RI06		0	3.88011e+08	0	4.945e-06	4.13796	2	2465.26	-2.30365	89.443	0
	High	mKKPSTSGQNFHSDVDYRGPK	1	2	2	Q01804;D6RI06	M1(Oxidation)	0	1.44391e+08	0	0.0001394	3.85986	4	2395.14	-2.29325	25.3232	2
	High	TAAAAADVNGFKPLSGNELK	1	1	1	D6RI06		0	9.19436e+06	0	0.0001394	3.61182	2	1974.02	-4.25109	61.7712	0
	High	KPSTSGQNFHSDVDYR	1	2	2	Q01804;D6RI06		0	8570750	0	0.0001058	3.57955	2	1837.85	-0.364871	26.4221	0
	High	NPSKPIKAPSALPPR	3	2	2	Q01804;D6RI06		0	1.88103e+07	0	0.0001394	3.3983	3	1572.92	-3.51081	30.9052	1
	High	KPSTSGQNFHSDVDYRGPK	1	2	2	Q01804;D6RI06		0	27918948	0	0.0001394	3.24325	3	2120	-5.1115	27.0885	1
	High	NLKAPPPESWNTVSGKK	1	2	2	Q01804;D6RI06		0	4.93821e+07	0	0.001179	3.16447	3	1852.99	-3.18911	37.9909	2
	High	mKKPSTSGQNFHSDVDYR	2	2	2	Q01804;D6RI06	M1(Oxidation)	0	8.09841e+07	0	0.0001394	3.06808	2	2112.97	-1.13275	24.6483	1
	High	DYSIAAGLQYEVGDK	2	2	2	Q01804;D6RI06		0	0	0	0.0001027	2.9648	2	1628.78	-2.16132	87.5444	0
	High	VLLcFSNGNHYDIVYPIK	2	3	2	Q01804;D6RI06	C4(Carbamidomethyl)	0	72365643	0	0.0002623	2.95597	2	2152.08	-2.71712	91.0585	0
	High	NLKAPPPESWNTVSGK	1	2	2	Q01804;D6RI06		0	2.49489e+07	0	0.0006116	2.79184	2	1724.89	-2.85239	47.3532	1
	High	NNGNSTSLPLSR	1	2	2	Q01804;D6RI06		0	1.35777e+08	0	0.0002292	2.53718	2	1259.63	-5.28445	36.6801	0
	High	NVEYEIWLK	1	2	2	Q01804;D6RI06		0	2.74152e+08	0	0.0006593	2.32098	2	1193.62	-2.12798	78.3158	0
	High	KDFIIYREPNVSPSQVTENNFPEK	1	3	2	Q01804;D6RI06		0	9.79444e+07	0.001	0.007069	2.35206	4	2851.42	-1.72754	72.7188	2
	High	ERVEDFDHTSR	1	2	2	Q01804;D6RI06		0	7.14703e+07	0.001	0.007069	2.04506	2	1390.63	-2.422	24.061	1
	High	APSALPPR	1	2	2	Q01804;D6RI06		0	0	0.001	0.007069	1.97933	2	808.465	-2.91137	26.5832	0
Q6I9T1	Mothers against decapentaplegic homolog OS=Homo sapiens OX=9606 GN=MADH5 PE=2 SV=1 - [Q6I9T1_HUMAN]	72.0603	26.88	6	4	11	26	7.43603e+08	465	52.1947	7.7085
	A2	Sequence	# PSMs	# Proteins	# Protein Groups	Protein Group Accessions	Modifications	ΔCn	Area	q-Value	PEP	XCorr	Charge	MH+ [Da]	ΔM [ppm]	RT [min]	# Missed Cleavages
	High	VGEAFHASSTSVLVDGFTDPSNNK	2	4	2	Q6I9T1;Q15797		0	4.09826e+08	0	0.0001394	4.30203	2	2479.17	-2.77741	79.3623	0
	High	HNEFNPQHSLLVQFR	5	2	1	Q6I9T1		0	1.05703e+09	0	0.0001394	4.19243	3	1865.94	-2.52693	62.6734	0
	High	HWcSIVYYELNNR	3	4	2	Q6I9T1;Q15797	C3(Carbamidomethyl)	0	9.35613e+07	0	0.0001394	3.63702	3	1753.81	-2.24939	72.5049	0
	High	FcLGLLSNVNR	2	14	5	B7Z5N5;Q6I9T1;Q15797;Q59F45;A0A024RDR3	C2(Carbamidomethyl)	0	5.65115e+08	0	0.0001394	3.38694	2	1292.67	-2.45461	84.2408	0
	High	NcNFHHGFHPTTVcK	2	2	1	Q6I9T1	C2(Carbamidomethyl); C14(Carbamidomethyl)	0	6.05879e+07	0	0.002887	3.36998	3	1855.81	-2.73608	24.9724	0
	High	RVESPVLPPVLVPR	4	3	2	Q6I9T1;Q15797		0	6.08666e+08	0	0.001857	3.01039	2	1557.94	-3.09041	75.5912	1
	High	VESPVLPPVLVPR	3	3	2	Q6I9T1;Q15797		0	5.44374e+08	0	0.0001394	2.86085	3	1401.84	-2.75838	91.7655	0
	High	DVQPVAYEEPKHWcSIVYYELNNR	2	3	1	Q6I9T1	C14(Carbamidomethyl)	0	131761808	0	0.0001394	2.80733	3	3009.42	-1.59466	93.9085	1
	High	SRFcLGLLSNVNR	1	3	1	Q6I9T1	C4(Carbamidomethyl)	0	0	0.003	0.02155	2.31704	3	1535.78	-18.2311	67.8423	1
	High	KGLPHVIYcR	1	17	5	B7Z5N5;Q6I9T1;Q15797;Q59F45;A0A024RDR3	C9(Carbamidomethyl)	0	55570772	0.003	0.02653	2.07117	2	1242.67	-5.85804	30.5222	1
	High	EVcINPYHYK	1	5	2	Q6I9T1;Q15797	C3(Carbamidomethyl)	0	6.41002e+07	0.007	0.07518	2.05728	2	1322.62	-1.29721	42.4541	0
P31942	Heterogeneous nuclear ribonucleoprotein H3 OS=Homo sapiens OX=9606 GN=HNRNPH3 PE=1 SV=2 - [HNRH3_HUMAN]	71.2467	68.21	12	13	14	27	7.46275e+08	346	36.9031	6.87354
	A2	Sequence	# PSMs	# Proteins	# Protein Groups	Protein Group Accessions	Modifications	ΔCn	Area	q-Value	PEP	XCorr	Charge	MH+ [Da]	ΔM [ppm]	RT [min]	# Missed Cleavages
	High	RGGDGYDGGYGGFDDYGGYNNYGYGNDGFDDR	1	3	1	P31942		0	9.0867e+07	0	6.405e-06	5.21535	3	3435.3	-2.64656	83.639	1
	High	ATGEADVEFVTHEDAVAAmSK	5	4	1	P31942	M19(Oxidation)	0	5.45581e+08	0	8.618e-06	4.23042	2	2193.99	-2.16099	60.9539	0
	High	GmGGHGYGGAGDASSGFHGGHFVHmR	2	4	1	P31942	M2(Oxidation); M25(Oxidation)	0	4.63258e+08	0	0.0001394	4.14289	3	2575.07	-1.87776	27.4428	0
	High	ATENDIANFFSPLNPIR	2	4	1	P31942		0	4.39577e+08	0	5.025e-06	4.00275	2	1918.96	-1.76729	101.041	0
	High	mGmGNNYSGGYGTPDGLGGYGR	2	4	1	P31942	M1(Oxidation); M3(Oxidation)	0	3.21448e+07	0	8.128e-06	3.94569	2	2212.9	-2.40456	59.1402	0
	High	YIELFLNSTPGGGSGmGGSGmGGYGR	3	3	1	P31942	M16(Oxidation); M21(Oxidation)	0	3.78702e+08	0	0.0001394	3.71093	2	2554.13	-1.52729	86.7873	0
	High	DGmDNQGGYGSVGR	2	4	1	P31942	M3(Oxidation)	0	4.26538e+08	0	0.0001394	3.34086	2	1428.58	-1.65723	27.8511	0
	High	GGGGSGGYYGQGGmSGGGWR	1	4	1	P31942	M14(Oxidation)	0	2.08993e+07	0	0.0001037	2.8801	2	1820.73	-4.13925	38.5634	0
	High	STGEAFVQFASK	2	2	1	P31942		0	1.12894e+09	0	0.0001394	2.85361	2	1271.62	-1.87644	59.4127	0
	High	VHIDIGADGR	3	4	1	P31942		0	5.54676e+08	0	0.001768	2.7413	3	1052.55	-2.04602	35.4214	0
	High	LRGLPFGcSK	1	19	3	P31942;P55795;A0A384MEJ3	C8(Carbamidomethyl)	0	16870193	0.002	0.01145	2.35688	3	1134.61	-1.20591	43.0933	1
	High	EIAENALGK	1	2	1	P31942		0	5.5521e+08	0.002	0.008933	1.38997	2	944.503	-1.98522	32.1179	0
	High	YIEIFR	1	10	1	P31942		0	502831390	0.003	0.0265	1.92016	2	840.459	-2.50357	60.1124	0
	High	SEIKGFYDPPR	1	2	1	P31942		0	1.53686e+07	0.006	0.05662	1.56127	2	1308.66	-1.2742	42.6641	1
A0A0S2Z4G7	Nucleophosmin (Fragment) OS=Homo sapiens OX=9606 GN=NPM1 PE=2 SV=1 - [A0A0S2Z4G7_HUMAN]	70.872	50.19	9	11	11	24	5.48466e+08	265	29.4462	4.61475
	A2	Sequence	# PSMs	# Proteins	# Protein Groups	Protein Group Accessions	Modifications	ΔCn	Area	q-Value	PEP	XCorr	Charge	MH+ [Da]	ΔM [ppm]	RT [min]	# Missed Cleavages
	High	ADKDYHFKVDNDENEHQLSLR	3	4	1	A0A0S2Z4G7		0	3.58637e+08	0	5.181e-10	5.86499	3	2573.2	-2.48202	43.786	2
	High	TVSLGAGAKDELHIVEAEAmNYEGSPIK	4	4	1	A0A0S2Z4G7	M20(Oxidation)	0	4.93068e+08	0	1.143e-06	5.60274	3	2945.44	-7.11285	90.8802	1
	High	DYHFKVDNDENEHQLSLR	1	4	1	A0A0S2Z4G7		0	10123693	0	0.0001394	4.05794	3	2259.03	-4.99645	51.9461	1
	High	DELHIVEAEAmNYEGSPIK	3	4	1	A0A0S2Z4G7	M11(Oxidation)	0	8.53933e+07	0	1.258e-05	3.85504	2	2161.01	-2.42336	86.5563	0
	High	mTDQEAIQDLWQWR	2	3	1	A0A0S2Z4G7	M1(Oxidation)	0	2.25864e+08	0	0.0001431	3.53675	3	1835.84	-1.34478	99.1099	0
	High	VDNDENEHQLSLR	3	5	1	A0A0S2Z4G7		0	2.7097e+08	0	0.0001394	3.32271	2	1568.73	-2.86209	32.9045	0
	High	mSVQPTVSLGGFEITPPVVLR	2	7	1	A0A0S2Z4G7	M1(Oxidation)	0	1.96904e+08	0	0.0001394	3.01492	3	2243.21	-2.1731	100.978	0
	High	GPSSVEDIKAK	2	7	1	A0A0S2Z4G7		0	1.02002e+08	0	0.0002102	3.00512	2	1130.6	-2.56392	24.5078	1
	High	LAADEDDDDDDEEDDDEDDDDDDFDDEEAEEKAPVKK	1	6	1	A0A0S2Z4G7		0	3.18688e+08	0	0.001438	2.91026	4	4246.54	-3.07801	56.9559	2
	High	GPSSVEDIK	1	7	1	A0A0S2Z4G7		0	7.93692e+08	0.001	0.004468	2.27191	2	931.472	-1.65983	27.118	0
	High	MSVQPTVSLGGFEITPPVVLR	1	7	1	A0A0S2Z4G7		0	0	0.001	0.005213	1.76577	3	2227.21	-1.97804	101.405	0
	High	mTDQEAIQDLWQWRK	1	3	1	A0A0S2Z4G7	M1(Oxidation)	0	1.57223e+07	0.002	0.007069	1.903	3	1963.93	-3.61865	81.8435	1
P08670	Vimentin OS=Homo sapiens OX=9606 GN=VIM PE=1 SV=4 - [VIME_HUMAN]	69.7073	50	20	20	20	24	1.54133e+08	466	53.6191	5.12256
	A2	Sequence	# PSMs	# Proteins	# Protein Groups	Protein Group Accessions	Modifications	ΔCn	Area	q-Value	PEP	XCorr	Charge	MH+ [Da]	ΔM [ppm]	RT [min]	# Missed Cleavages
	High	KVESLQEEIAFLK	2	4	1	P08670		0	6.44329e+07	0	1.368e-06	4.93108	3	1533.85	-2.22947	75.4033	1
	High	ILLAELEQLKGQGK	1	5	1	P08670		0	7.10231e+07	0	0.0001394	3.783	2	1539.91	-1.73178	72.0838	1
	High	EmEENFAVEAANYQDTIGR	2	5	1	P08670	M2(Oxidation)	0	3.21175e+07	0	1.497e-06	3.66859	3	2202.96	-1.32793	80.0047	0
	High	SLYASSPGGVYATR	1	6	1	P08670		0	1.8324e+08	0	0.0001394	3.15311	2	1428.71	-2.20166	50.4521	0
	High	ISLPLPNFSSLNLR	1	3	1	P08670		0	8.42668e+06	0	0.0001394	3.14091	3	1570.89	-1.81627	100.931	0
	High	DGQVINETSQHHDDLE	1	2	1	P08670		0	4.91724e+07	0	0.0001794	3.03716	2	1836.79	-2.6884	38.9347	0
	High	LGDLYEEEmR	2	4	1	P08670	M9(Oxidation)	0	1.85045e+07	0	0.0004734	2.9091	2	1270.56	-3.26421	45.4262	0
	High	ETNLDSLPLVDTHSKR	1	2	1	P08670		0	1.61328e+07	0	0.0001394	2.82121	2	1824.94	-1.39118	54.3418	1
	High	TNEKVELQELNDR	2	14	1	P08670		0	109787475	0	0.0001394	2.81806	2	1587.79	-2.50583	40.0113	1
	High	ILLAELEQLK	1	5	1	P08670		0	5.51205e+07	0	0.0004282	2.75309	2	1169.71	-2.42116	88.9573	0
	High	FADLSEAANR	1	5	1	P08670		0	1.65989e+08	0	0.0001394	2.64088	2	1093.53	-1.72202	42.796	0
	High	EEAENTLQSFRQDVDNASLAR	1	5	1	P08670		0	3.32651e+07	0	0.0001394	2.63868	3	2393.13	-0.575573	77.8233	1
	High	QVQSLTcEVDALKGTNESLER	1	5	1	P08670	C7(Carbamidomethyl)	0	3.55689e+07	0	0.0001394	2.55093	3	2377.17	-0.594021	71.2551	1
	High	FANYIDKVR	1	5	1	P08670		0	3.03887e+07	0	0.001741	2.34236	3	1125.6	-2.5433	40.9605	1
	High	QDVDNASLAR	1	5	1	P08670		0	6.14017e+07	0	0.002329	2.33052	2	1088.53	-2.46956	27.832	0
	High	LQDEIQNmKEEmAR	1	5	1	P08670	M8(Oxidation); M12(Oxidation)	0	1.97267e+07	0.001	0.006289	2.71606	2	1766.8	-2.83508	26.4011	1
	High	QVQSLTcEVDALK	1	5	1	P08670	C7(Carbamidomethyl)	0	0	0.001	0.004565	2.21536	2	1490.75	-2.5281	65.3002	0
	High	NLQEAEEWYK	1	9	1	P08670		0	1.13171e+08	0.001	0.006567	2.06242	2	1309.6	-2.19636	57.4496	0
	High	LLQDSVDFSLADAINTEFK	1	6	1	P08670		0	0	0.002	0.0111	2.69846	2	2126.08	7.66634	101.976	0
	High	ETNLDSLPLVDTHSK	1	2	1	P08670		0	3.3058e+07	0.002	0.007069	2.46746	2	1668.84	-0.981845	65.3584	0
B3KM80	Nucleolin OS=Homo sapiens OX=9606 GN=NCL PE=2 SV=1 - [B3KM80_HUMAN]	69.394	44.96	6	24	24	28	3.88791e+08	536	58.5193	4.66553
	A2	Sequence	# PSMs	# Proteins	# Protein Groups	Protein Group Accessions	Modifications	ΔCn	Area	q-Value	PEP	XCorr	Charge	MH+ [Da]	ΔM [ppm]	RT [min]	# Missed Cleavages
	High	KFGYVDFESAEDLEK	2	4	1	B3KM80		0	2.34867e+08	0	1.976e-06	4.69848	2	1776.83	-2.30209	75.3397	1
	High	GYAFIEFASFEDAK	1	6	1	B3KM80		0	1.44367e+07	0	9.902e-06	4.22922	2	1594.74	-0.53084	99.7422	0
	High	VEGTEPTTAFNLFVGNLNFNK	1	4	1	B3KM80		0	72181366	0	0.0001115	3.97962	2	2312.15	-1.80887	101.336	0
	High	FGYVDFESAEDLEK	1	4	1	B3KM80		0	1.11165e+08	0	3.633e-05	3.81634	2	1648.73	-1.9631	90.0236	0
	High	TLVLSNLSYSATEETLQEVFEK	1	6	1	B3KM80		0	5.26937e+07	0	0.0001394	3.57484	2	2501.26	-2.30841	101.698	0
	High	GFGFVDFNSEEDAK	1	6	1	B3KM80		0	3.78613e+08	0	0.0001111	3.481	2	1561.68	-2.67155	83.4979	0
	High	EAmEDGEIDGNKVTLDWAKPK	1	6	1	B3KM80	M3(Oxidation)	0	1.65971e+08	0	0.0001394	3.46051	3	2362.12	-1.75375	61.7218	1
	High	GLSEDTTEETLKESFDGSVR	2	6	1	B3KM80		0	3.76044e+08	0	1.139e-05	3.38545	2	2200.02	-3.14686	72.9698	1
	High	KQKVEGTEPTTAFNLFVGNLNFNK	1	4	1	B3KM80		0	7.71495e+07	0	0.003457	3.34242	3	2696.4	-2.04845	91.6773	2
	High	SKGYAFIEFASFEDAK	2	6	1	B3KM80		0	26028171	0	9.689e-06	3.31873	2	1809.87	-2.24727	85.1335	1
	High	EVFEDAAEIR	1	5	1	B3KM80		0	4.11717e+08	0	0.0001394	2.87704	2	1178.57	-2.66415	57.5672	0
	High	GLSEDTTEETLK	1	6	1	B3KM80		0	2.87964e+07	0	0.0001454	2.75068	2	1322.63	-2.48554	41.0665	0
	High	AIRLELQGPR	1	6	1	B3KM80		0	1.02931e+07	0	0.0001394	2.72752	3	1152.68	-1.62645	45.563	1
	High	TEADAEKTFEEK	1	6	1	B3KM80		0	1.04718e+08	0	0.0001394	2.66579	2	1397.64	-0.987426	27.394	1
	High	NDLAVVDVR	1	4	1	B3KM80		0	263334373	0	0.0002621	2.52498	2	1000.54	-2.7025	52.5339	0
	High	TGISDVFAK	1	4	1	B3KM80		0	2.62036e+08	0.001	0.004808	2.22823	2	937.496	-2.75821	57.488	0
	High	VFGNEIKLEKPK	2	4	1	B3KM80		0	89145915	0.001	0.007069	1.41955	4	1401.81	-2.54103	39.8646	1
	High	TEADAEKTFEEKQGTEIDGR	1	6	1	B3KM80		0	1.19871e+07	0.002	0.007098	2.61901	3	2254.05	-0.703604	41.0882	2
	High	SISLYYTGEK	1	6	1	B3KM80		0	202558393	0.002	0.007069	2.3523	2	1160.58	-1.66537	52.6825	0
	High	ALELTGLK	1	4	1	B3KM80		0	1.69956e+08	0.002	0.01089	1.57919	2	844.512	-2.29937	53.3537	0
	High	GIAYIEFK	1	6	1	B3KM80		0	1.53725e+08	0.002	0.01085	1.33224	2	940.514	-0.172062	64.8637	0
	High	VTLDWAKPK	1	6	1	B3KM80		0	6461591	0.003	0.01659	1.49477	3	1057.6	-1.85829	43.645	0
	High	ATFIKVPQNQNGK	1	6	1	B3KM80		0	39525439	0.004	0.03822	2.38072	2	1444.79	-3.2482	34.3707	1
	High	LELQGPR	1	6	1	B3KM80		0	2.31011e+08	0.004	0.03534	1.52847	2	812.46	-2.79229	33.7287	0
Q7Z417	Nuclear fragile X mental retardation-interacting protein 2 OS=Homo sapiens OX=9606 GN=NUFIP2 PE=1 SV=1 - [NUFP2_HUMAN]	67.4059	47.91	1	22	22	28	3.62817e+08	695	76.0747	8.70459
	A2	Sequence	# PSMs	# Proteins	# Protein Groups	Protein Group Accessions	Modifications	ΔCn	Area	q-Value	PEP	XCorr	Charge	MH+ [Da]	ΔM [ppm]	RT [min]	# Missed Cleavages
	High	SGTTSESGALSLEPSHIGDLQK	3	1	1	Q7Z417		0	4.67483e+08	0	1.687e-06	4.17444	2	2214.08	-2.03666	65.3441	0
	High	HASAVASKEDSWTLFKPPPVFPVDNSSAK	1	1	1	Q7Z417		0	6.24129e+07	0	0.0001394	4.00946	3	3112.56	-4.12553	82.2029	1
	High	SGENQSVDKSDTIPIPNGVVTNNSGYITNGYmGK	1	1	1	Q7Z417	M32(Oxidation)	0	47867670	0	0.0001394	3.87289	3	3572.67	-1.86827	82.2298	1
	High	ADTSSQGALVFLSK	2	1	1	Q7Z417		0	1.87282e+08	0	0.0001394	3.57846	3	1423.74	-3.30083	73.2533	0
	High	GADNDGSGSESGYTTPK	1	1	1	Q7Z417		0	3.50373e+07	0	6.554e-07	3.54407	2	1642.68	-2.4489	25.5515	0
	High	DYEIESQNPLASPTNTLLGSAK	1	1	1	Q7Z417		0	3.94581e+07	0	0.0001394	3.45791	3	2348.16	-0.0715982	99.2548	0
	High	IITYNEAmDSPDQ	2	1	1	Q7Z417	M8(Oxidation)	0	1.81647e+08	0	0.0006523	3.18124	2	1512.65	-3.42709	54.7862	0
	High	RIITYNEAmDSPDQ	1	1	1	Q7Z417	M9(Oxidation)	0	2.77915e+07	0	0.0001007	3.09724	2	1668.75	-2.03667	43.9752	1
	High	GcENLNIVQDK	1	1	1	Q7Z417	C2(Carbamidomethyl)	0	7.17322e+07	0	0.0001394	3.01756	2	1289.61	-1.3882	42.8444	0
	High	VmEVTFQGEYPATLVSQGAEIIPSGTEHPVFPK	1	1	1	Q7Z417	M2(Oxidation)	0	3.97363e+07	0	0.000149	3.01227	3	3574.78	0.507937	99.6909	0
	High	TIQNSSVSPTSSSSSSSSTGETQTQSSSR	1	1	1	Q7Z417		0	64129480	0	0.0001394	2.8935	3	2892.29	-1.87294	32.3417	0
	High	TGYGELNGNAGER	1	1	1	Q7Z417		0	95825007	0	0.0001394	2.89279	2	1337.6	-2.92891	31.5487	0
	High	ImQQETSVPTLK	2	1	1	Q7Z417	M2(Oxidation)	0	2.50398e+08	0	0.0001394	2.87479	2	1390.72	-1.35209	43.9477	0
	High	GcENLNIVQDKImQQETSVPTLK	1	1	1	Q7Z417	C2(Carbamidomethyl); M13(Oxidation)	0	3.94692e+07	0	0.0001394	2.71387	3	2661.31	-5.68375	78.9554	1
	High	VLNGNQQVVDTSLK	1	1	1	Q7Z417		0	1.49647e+08	0	0.0007151	2.45022	2	1514.81	-1.8884	50.6594	0
	High	NLSSDEATNPISR	1	1	1	Q7Z417		0	370569870	0	0.0003012	2.34741	2	1403.67	-1.63541	42.7975	0
	High	NDSWGSFDLR	1	1	1	Q7Z417		0	1.33585e+08	0	0.0001426	2.25889	2	1196.53	-2.04262	72.8222	0
	High	QGLETFKPDYSEQK	2	1	1	Q7Z417		0	1.63371e+08	0	0.00106	1.79681	3	1669.8	-2.40851	46.284	0
	High	EmESIWNLQK	1	1	1	Q7Z417	M2(Oxidation)	0	1.16871e+08	0.001	0.007069	2.33847	2	1293.61	-2.64128	61.6009	0
	High	RTSPQVLGSILK	1	1	1	Q7Z417		0	9276915	0.002	0.01256	1.88152	3	1298.78	-2.58769	52.2856	1
	High	TSPQVLGSILK	1	1	1	Q7Z417		0	2.5012e+08	0.002	0.007069	0.966916	2	1142.68	-2.54217	69.5058	0
	High	GKPAVGDmLR	1	1	1	Q7Z417	M8(Oxidation)	0	7.43339e+07	0.003	0.01786	1.57468	2	1059.56	-2.80773	23.6668	0
Q12906	Interleukin enhancer-binding factor 3 OS=Homo sapiens OX=9606 GN=ILF3 PE=1 SV=3 - [ILF3_HUMAN]	64.8836	27.18	21	21	21	30	1.7233e+08	894	95.2791	8.76318
	A2	Sequence	# PSMs	# Proteins	# Protein Groups	Protein Group Accessions	Modifications	ΔCn	Area	q-Value	PEP	XCorr	Charge	MH+ [Da]	ΔM [ppm]	RT [min]	# Missed Cleavages
	High	HSSVYPTQEELEAVQNmVSHTER	3	13	1	Q12906	M17(Oxidation)	0	6.58389e+07	0	0.0001329	4.4894	3	2687.23	-4.04622	68.4379	0
	High	VLAGETLSVNDPPDVLDR	2	8	1	Q12906		0	1.01332e+08	0	0.0001394	3.75241	3	1909.98	-1.52542	86.7856	0
	High	VLQDmGLPTGAEGR	2	7	1	Q12906	M5(Oxidation)	0	7.337e+07	0	0.0001394	3.68442	2	1459.72	-2.20951	48.7358	0
	High	YELISETGGSHDKR	1	9	1	Q12906		0	18418754	0	0.0001394	3.5858	2	1591.77	-3.35265	27.5572	1
	High	NTKEPPLSLTIHLTSPVVR	3	10	1	Q12906		0	5.25501e+07	0	0.0001394	3.2102	3	2102.19	-1.92993	73.5418	1
	High	SGGNSYGSGGASYNPGSHGGYGGGSGGGSSYQGK	1	3	1	Q12906		0	8.14927e+07	0	0.0001394	3.19644	3	3012.23	-3.33577	35.4513	0
	High	EDITQSAQHALR	1	7	1	Q12906		0	9.84096e+07	0	0.0001394	3.17798	2	1368.68	-2.39215	40.7194	0
	High	QQREDITQSAQHALR	1	7	1	Q12906		0	34722222	0	0.0001394	2.89388	3	1780.9	-3.36424	31.1625	1
	High	GLKYELISETGGSHDKR	2	9	1	Q12906		0	1.6909e+08	0	0.0001394	2.83369	3	1889.96	-3.90153	33.1089	2
	High	AYAALAALEK	1	7	1	Q12906		0	187881030	0	0.0001552	2.43632	2	1020.57	-2.54709	58.8631	0
	High	EPPLSLTIHLTSPVVR	2	10	1	Q12906		0	4.97278e+07	0	0.0005789	2.37091	3	1759.01	-2.53052	87.5408	0
	High	GWPLELLcEK	2	9	1	Q12906	C8(Carbamidomethyl)	0	3.72059e+07	0	0.002932	2.29122	2	1244.63	-1.16752	97.1131	0
	High	LNQLKPGLQYK	1	7	1	Q12906		0	1.30076e+08	0	0.001831	2.12463	2	1301.76	-1.98871	37.247	0
	High	AVSDWIDEQEK	1	14	1	Q12906		0	4.37228e+07	0	0.0001394	1.98678	2	1319.61	-2.09238	59.2633	0
	High	FVmEVEVDGQK	1	9	1	Q12906	M3(Oxidation)	0	1.07618e+07	0	0.002094	1.80138	2	1296.61	-2.38837	44.5763	0
	High	LFPDTPLALDANKK	1	7	1	Q12906		0	3.87807e+07	0.001	0.003964	1.9385	2	1542.85	-2.13142	70.0515	1
	High	LAAFGQLHK	1	7	1	Q12906		0	7.92169e+07	0.001	0.004373	1.87687	3	984.561	-2.05248	35.0697	0
	High	LFPDTPLALDANK	1	7	1	Q12906		0	1.60019e+08	0.003	0.01968	1.79244	2	1414.75	-1.97977	86.108	0
	High	VPTWGPLR	1	8	1	Q12906		0	6.89167e+07	0.003	0.01997	1.57475	2	925.524	-2.06928	58.8753	0
	High	ScVIVIR	1	10	1	Q12906	C2(Carbamidomethyl)	0	2.90421e+07	0.007	0.08242	1.62428	2	846.485	-2.31376	42.0629	0
	High	IFVNDDRHVmAK	1	13	1	Q12906	M10(Oxidation)	0	6.92256e+07	0.009	0.1018	1.61133	3	1460.73	-2.50417	26.4838	1
A8K525	cDNA FLJ76817, highly similar to Homo sapiens non-POU domain containing, octamer-binding (NONO), mRNA OS=Homo sapiens OX=9606 PE=2 SV=1 - [A8K525_HUMAN]	64.8662	45.44	7	14	15	26	6.11713e+08	471	54.2534	9.20264
	A2	Sequence	# PSMs	# Proteins	# Protein Groups	Protein Group Accessions	Modifications	ΔCn	Area	q-Value	PEP	XCorr	Charge	MH+ [Da]	ΔM [ppm]	RT [min]	# Missed Cleavages
	High	NLPQYVSNELLEEAFSVFGQVER	4	3	1	A8K525		0	1.61802e+08	0	8.292e-07	5.55964	3	2668.32	-2.11143	104.671	0
	High	FGQAATmEGIGAIGGTPPAFNR	2	2	1	A8K525	M7(Oxidation)	0	5.57973e+08	0	8.357e-07	3.77472	2	2179.05	-2.61826	81.319	0
	High	FAcHSASLTVR	2	4	1	A8K525	C3(Carbamidomethyl)	0	176908792	0	0.0001394	3.6728	3	1248.61	-3.09938	30.7713	0
	High	FAQPGSFEYEYAmR	3	4	1	A8K525	M13(Oxidation)	0	3.25631e+08	0	4.187e-05	3.60663	2	1711.74	-2.58673	66.628	0
	High	ALIEmEKQQQDQVDR	1	4	1	A8K525	M5(Oxidation)	0	4.66772e+06	0	0.0001394	3.17261	2	1846.89	-2.46522	32.2979	1
	High	LFVGNLPPDITEEEmR	5	6	1	A8K525	M15(Oxidation)	0	4.2402e+07	0	0.0001394	3.01603	3	1875.91	-2.3051	88.525	0
	High	TLAEIAKVELDNmPLR	1	6	1	A8K525	M13(Oxidation)	0	1.64034e+07	0	0.0001394	2.42305	2	1828.98	-4.00676	78.2942	1
	High	AGEVFIHK	1	6	1	A8K525		0	2.40351e+08	0.002	0.007151	2.30488	2	900.492	-2.16816	26.316	0
	High	AGEVFIHKDK	1	6	1	A8K525		0	3.29254e+07	0.002	0.01347	2.21112	3	1143.61	-2.228	22.6208	1
	High	AVVIVDDR	1	8	2	A8K525;Q9BSV4		0	808033183	0.002	0.01029	1.59698	2	886.497	-2.19882	36.6901	0
	High	GIVEFSGKPAAR	1	4	1	A8K525		0	4.69131e+08	0.002	0.009803	1.39358	2	1231.68	-3.31316	36.905	0
	High	AAPGAEFAPNKR	1	2	1	A8K525		0	2.75498e+08	0.002	0.007069	1.26598	2	1228.64	-3.19004	26.6251	1
	High	DKGFGFIR	1	6	1	A8K525		0	2.71606e+07	0.003	0.02237	2.18799	3	939.503	-1.97872	47.0942	1
	High	QQEGFKGTFPDAR	1	2	1	A8K525		0	3.5451e+07	0.003	0.01783	1.39047	2	1480.71	-2.67063	38.8985	1
	High	GAmPPAPVPAGTPAPPGPATmmPDGTLGLTPPTTER	1	2	1	A8K525	M3(Oxidation); M21(Oxidation); M22(Oxidation)	0	2.63578e+08	0.004	0.03874	2.58233	4	3499.69	-1.46489	90.776	0
B7Z4V2	75 kDa glucose-regulated protein OS=Homo sapiens OX=9606 PE=2 SV=1 - [B7Z4V2_HUMAN]	64.1506	34.74	14	15	15	22	1.44064e+08	665	72.3561	5.93506
	A2	Sequence	# PSMs	# Proteins	# Protein Groups	Protein Group Accessions	Modifications	ΔCn	Area	q-Value	PEP	XCorr	Charge	MH+ [Da]	ΔM [ppm]	RT [min]	# Missed Cleavages
	High	LYSPSQIGAFVLmK	4	7	1	B7Z4V2	M13(Oxidation)	0	4.42354e+07	0	6.23e-05	4.61439	3	1569.83	-0.484687	95.0525	0
	High	STNGDTFLGGEDFDQALLR	1	7	1	B7Z4V2		0	3.27791e+07	0	6.556e-07	4.40988	2	2055.96	0.390466	99.3976	0
	High	SQVFSTAADGQTQVEIK	1	7	1	B7Z4V2		0	20432926	0	0.0001394	3.93384	2	1808.9	-1.30865	60.9321	0
	High	AQFEGIVTDLIR	2	8	1	B7Z4V2		0	1.40397e+08	0	0.0001394	3.70421	3	1361.74	-0.923643	97.5234	0
	High	VINEPTAAALAYGLDK	1	6	1	B7Z4V2		0	4.07315e+07	0	3.028e-05	3.23086	2	1645.88	-2.49437	81.3692	0
	High	ETGVDLTKDNmALQR	2	8	1	B7Z4V2	M11(Oxidation)	0	1.01096e+08	0	0.0001394	3.17441	2	1706.84	-1.67431	44.3567	1
	High	SDIGEVILVGGmTR	2	8	1	B7Z4V2	M12(Oxidation)	0	2.71693e+07	0	0.0001396	2.9167	2	1462.75	-2.31522	77.3431	0
	High	QAVTNPNNTFYATK	1	8	1	B7Z4V2		0	6.23929e+07	0	0.0001394	2.67089	2	1568.77	-2.54103	43.2031	0
	High	TTPSVVAFTADGER	2	8	1	B7Z4V2		0	1.63527e+08	0	0.0001395	2.45767	2	1450.71	-2.85304	61.2594	0
	High	NAVITVPAYFNDSQR	1	7	1	B7Z4V2		0	1.22148e+08	0	0.0001757	2.41178	2	1694.85	-2.77488	79.8304	0
	High	EQQIVIQSSGGLSK	1	6	1	B7Z4V2		0	5.8029e+07	0	0.0001394	2.36275	2	1473.79	-2.97652	48.908	0
	High	QAASSLQQASLK	1	6	1	B7Z4V2		0	8.17719e+07	0	0.001854	2.29689	2	1231.66	-1.71021	32.0279	0
	High	DAGQISGLNVLR	1	6	1	B7Z4V2		0	1.28268e+08	0	0.0001738	2.14424	2	1242.68	-0.818033	74.7803	0
	High	VEAVNmAEGIIHDTETK	1	6	1	B7Z4V2	M6(Oxidation)	0	1.51836e+07	0.001	0.007069	2.14002	3	1872.9	-1.57188	59.3968	0
	High	AKcELSSSVQTDINLPYLTmDSSGPK	1	7	1	B7Z4V2	C3(Carbamidomethyl); M20(Oxidation)	0	2.62095e+07	0.002	0.007069	2.71834	3	2857.36	-0.893327	85.1553	1
B7Z2Z1	cDNA FLJ59523, highly similar to Scaffold attachment factor B OS=Homo sapiens OX=9606 PE=2 SV=1 - [B7Z2Z1_HUMAN]	63.3291	22.32	11	8	14	21	4.18548e+08	811	91.0304	7.23975
	A2	Sequence	# PSMs	# Proteins	# Protein Groups	Protein Group Accessions	Modifications	ΔCn	Area	q-Value	PEP	XCorr	Charge	MH+ [Da]	ΔM [ppm]	RT [min]	# Missed Cleavages
	High	KLAEEEDLFDSAHPEEGDLDLASESTAHAQSSK	4	9	2	B7Z2Z1;Q14151		0	3.71231e+08	0	0.0001178	5.70377	4	3556.59	-8.56243	72.4482	1
	High	SEPVKEESSELEQPFAQDTSSVGPDR	1	9	2	B7Z2Z1;Q14151		0	2.02781e+08	0	9.583e-06	4.44747	3	2848.31	-1.78048	66.4568	1
	High	LAEEEDLFDSAHPEEGDLDLASESTAHAQSSK	1	9	2	B7Z2Z1;Q14151		0	3.06318e+08	0	5.398e-08	4.29939	4	3428.52	-1.83281	79.1074	0
	High	KAIEDEGGNPDEIEITSEGNKK	1	7	1	B7Z2Z1		0	1.62537e+07	0	0.0001394	3.6281	3	2373.13	-2.86939	40.8403	2
	High	KFDFDAcNEVPPAPK	3	10	2	B7Z2Z1;Q14151	C7(Carbamidomethyl)	0	1.0688e+08	0	0.0001394	3.36287	2	1734.81	-2.2251	60.8633	1
	High	AIEDEGGNPDEIEITSEGNK	1	7	1	B7Z2Z1		0	2.28932e+07	0	2.256e-06	3.24471	2	2116.95	-2.80731	60.9966	0
	High	cYGFVTmSTAEEATK	1	8	1	B7Z2Z1	C1(Carbamidomethyl); M7(Oxidation)	0	1.25067e+07	0	0.0001394	3.16816	2	1710.73	-2.4187	53.83	0
	High	NFWVSGLSSTTR	2	8	1	B7Z2Z1		0	3.45473e+08	0	0.0001394	2.97352	2	1354.67	-2.12196	72.5853	0
	High	ADSLLAVVK	1	9	2	B7Z2Z1;Q14151		0	210547567	0	0.0001467	2.73363	2	915.549	-2.59922	61.6818	0
	High	SVVSFDKVKEPR	2	8	1	B7Z2Z1		0	8.09651e+07	0.001	0.004957	2.16937	2	1390.77	-2.62799	36.2721	2
	High	AIEDEGGNPDEIEITSEGNKK	1	7	1	B7Z2Z1		0	5.38941e+08	0.001	0.006938	2.06879	3	2245.04	-2.68	49.9602	1
	High	SWQGTADGGmmDRDHKR	1	8	1	B7Z2Z1	M10(Oxidation); M11(Oxidation)	0	1.56022e+07	0.002	0.01091	2.18124	3	1979.84	-4.48051	20.3642	2
	High	DGWGGYGSDKR	1	9	2	B7Z2Z1;Q14151		0	118289777	0.002	0.01041	2.16749	2	1197.52	-2.96731	28.8696	1
	High	DDAYWPEAK	1	9	1	B7Z2Z1		0	1.80075e+08	0.002	0.01451	1.77977	2	1094.48	-2.59438	53.0811	0
V9HWB4	78 kDa glucose-regulated protein OS=Homo sapiens OX=9606 GN=HEL-S-89n PE=2 SV=1 - [V9HWB4_HUMAN]	63.0893	35.02	2	18	20	26	3.5931e+08	654	72.2884	5.16064
	A2	Sequence	# PSMs	# Proteins	# Protein Groups	Protein Group Accessions	Modifications	ΔCn	Area	q-Value	PEP	XCorr	Charge	MH+ [Da]	ΔM [ppm]	RT [min]	# Missed Cleavages
	High	mKETAEAYLGKK	2	2	1	V9HWB4	M1(Oxidation)	0	1.01185e+07	0	0.0001394	4.53038	3	1384.71	-2.79954	23.2415	2
	High	LYGSAGPPPTGEEDTAEKDEL	1	1	1	V9HWB4		0	5.16995e+07	0	1.604e-06	4.139	2	2175.98	-4.80327	62.7223	1
	High	VLEDSDLKKSDIDEIVLVGGSTR	1	1	1	V9HWB4		0	1.21716e+07	0	0.0001394	3.62428	3	2488.31	-3.49884	80.0493	2
	High	NQLTSNPENTVFDAK	1	2	1	V9HWB4		0	6.0576e+07	0	0.0001394	3.3755	2	1677.8	-2.1173	58.7415	0
	High	IINEPTAAAIAYGLDK	2	21	2	V9HWB4;P11142		0	9.69146e+07	0	0.0001202	3.27948	3	1659.89	-2.38616	83.0506	0
	High	TFAPEEISAmVLTK	2	2	1	V9HWB4	M10(Oxidation)	0	2.73981e+07	0	0.0001394	3.09193	2	1552.79	-4.10987	83.8735	0
	High	IEWLESHQDADIEDFKAK	2	1	1	V9HWB4		0	4.28865e+07	0	2.689e-05	3.09137	3	2174.04	-1.85617	69.7821	1
	High	KKELEEIVQPIISK	1	1	1	V9HWB4		0	2.18205e+07	0	0.0001394	2.99654	2	1653.97	-2.4767	57.7037	2
	High	SQIFSTASDNQPTVTIK	2	1	1	V9HWB4		0	5.86252e+07	0	0.0001394	2.92434	2	1836.93	-1.97499	66.5732	0
	High	ELEEIVQPIISK	1	1	1	V9HWB4		0	3.01757e+07	0	0.0001394	2.78878	2	1397.79	-1.971	83.8034	0
	High	IEWLESHQDADIEDFK	1	1	1	V9HWB4		0	7978478	0	0.0001394	2.57765	2	1974.91	-1.01161	79.7625	0
	High	ITPSYVAFTPEGER	1	2	1	V9HWB4		0	9.07232e+07	0	0.0001561	2.48157	2	1566.78	-2.07584	68.7494	0
	High	DAGTIAGLNVmR	1	2	1	V9HWB4	M11(Oxidation)	0	5.09044e+07	0	0.0001795	2.26829	2	1233.62	-2.6866	58.8406	0
	High	TKPYIQVDIGGGQTK	1	2	1	V9HWB4		0	3.27285e+07	0	0.0003921	2.20871	2	1604.86	-1.82918	47.8303	0
	High	VEIIANDQGNR	2	43	3	P0DMV9;V9HWB4;P11142		0	828156269	0	0.0001394	2.11843	2	1228.62	-2.58482	34.5013	0
	High	ITITNDQNR	1	1	1	V9HWB4		0	4.48125e+07	0.001	0.006097	2.05	2	1074.55	-2.58555	26.2616	0
	High	KSDIDEIVLVGGSTR	1	1	1	V9HWB4		0	2.57563e+07	0.002	0.007193	2.58731	3	1588.85	-2.68976	64.2297	1
	High	EFFNGKEPSR	1	1	1	V9HWB4		0	1.68594e+07	0.002	0.007406	1.42471	2	1210.58	-2.35284	30.5241	1
	High	IINEPTAAAIAYGLDKR	1	2	1	V9HWB4		0	1.5286e+08	0.007	0.07961	1.40337	3	1815.99	-2.0046	72.7417	1
	High	VmEHFIK	1	2	1	V9HWB4	M2(Oxidation)	0	4.26781e+06	0.008	0.08557	1.986	3	919.469	-1.85929	24.8828	0
Q52LJ0	Protein FAM98B OS=Homo sapiens OX=9606 GN=FAM98B PE=1 SV=2 - [FA98B_HUMAN]	61.296	21.94	1	5	10	23	2.9746e+09	433	45.5187	8.68994
	A2	Sequence	# PSMs	# Proteins	# Protein Groups	Protein Group Accessions	Modifications	ΔCn	Area	q-Value	PEP	XCorr	Charge	MH+ [Da]	ΔM [ppm]	RT [min]	# Missed Cleavages
	High	LDVTVQSFGWSDR	3	6	2	Q8NCA5;Q52LJ0		0	7.05841e+08	0	1.172e-05	4.09132	2	1509.73	-2.73408	87.2424	0
	High	RLDVTVQSFGWSDR	5	6	2	Q8NCA5;Q52LJ0		0	1541826027	0	1.044e-05	4.07537	2	1665.83	-2.21224	74.0503	1
	High	mDLNSEQAEQLER	1	1	1	Q52LJ0	M1(Oxidation)	0	3.45282e+07	0	9.412e-05	3.89049	2	1578.7	-2.26632	44.2361	0
	High	GGRPNEIEPPPPEmPPWQK	7	6	2	Q8NCA5;Q52LJ0	M14(Oxidation)	0	6.67614e+09	0	0.0001394	3.56748	3	2172.05	-2.79153	57.1949	0
	High	GGRPNEIEPPPPEmPPWQKR	1	6	2	Q8NCA5;Q52LJ0	M14(Oxidation)	0	2.08874e+08	0	0.002429	3.43386	3	2328.15	-3.48916	49.1955	1
	High	VPDRGGRPNEIEPPPPEmPPWQK	1	6	2	Q8NCA5;Q52LJ0	M18(Oxidation)	0	62015335	0	0.003046	2.72706	3	2639.29	-3.40449	55.2267	1
	High	NHVGKPLLK	1	1	1	Q52LJ0		0	1.83159e+07	0	0.001013	2.29869	3	1005.62	-2.08928	21.2806	0
	High	GPLLEEQALTK	1	1	1	Q52LJ0		0	5.66571e+07	0	0.001727	2.17989	2	1198.66	-2.60361	55.5405	0
	High	INDALScEYEcR	1	1	1	Q52LJ0	C7(Carbamidomethyl); C11(Carbamidomethyl)	0	1.70453e+07	0	0.0001394	2.14728	2	1529.63	-2.82415	46.7773	0
	High	TTITmAHLLAAR	2	1	1	Q52LJ0	M5(Oxidation)	0	1.76014e+07	0.001	0.004044	2.38134	2	1314.72	-2.32128	41.6437	0
Q08945	FACT complex subunit SSRP1 OS=Homo sapiens OX=9606 GN=SSRP1 PE=1 SV=1 - [SSRP1_HUMAN]	61.2108	29.62	4	20	20	26	1.40623e+08	709	81.0244	6.87354
	A2	Sequence	# PSMs	# Proteins	# Protein Groups	Protein Group Accessions	Modifications	ΔCn	Area	q-Value	PEP	XCorr	Charge	MH+ [Da]	ΔM [ppm]	RT [min]	# Missed Cleavages
	High	ADVIQATGDAIcIFR	1	2	1	Q08945	C12(Carbamidomethyl)	0	8.99253e+06	0	1.805e-05	4.15342	3	1649.83	-1.08324	98.576	0
	High	TGKVDNIQAGELTEGIWR	2	2	1	Q08945		0	140265420	0	0.0001394	3.64659	2	1987.02	-1.88917	74.1003	1
	High	FDEISFVNFAR	1	1	1	Q08945		0	142297129	0	0.0001394	3.5508	2	1344.66	-1.33831	96.5637	0
	High	NmSGSLYEmVSR	1	1	1	Q08945	M2(Oxidation); M9(Oxidation)	0	6.24842e+07	0	0.000151	3.0923	2	1405.61	-2.51932	40.3122	0
	High	FYVPPTQEDGVDPVEAFAQNVLSK	1	2	1	Q08945		0	54426853	0	0.0001394	2.98296	2	2650.3	-0.692709	101.77	0
	High	IKSDHPGISITDLSK	1	2	1	Q08945		0	130545844	0	0.0001639	2.79616	3	1610.87	-2.14059	46.0982	1
	High	VDNIQAGELTEGIWR	1	2	1	Q08945		0	4.34643e+07	0	0.0001394	2.58563	2	1700.86	-1.45551	88.1811	0
	High	RPmSAYmLWLNASR	2	2	1	Q08945	M3(Oxidation); M7(Oxidation)	0	3.56724e+07	0	0.0001404	2.48205	3	1727.83	-2.41645	60.6546	0
	High	QGTQYTFSSIEREEYGK	2	1	1	Q08945		0	5.31469e+07	0	0.0006659	2.39363	2	2022.94	-2.06456	55.9155	1
	High	ASSGLLYPLER	1	1	1	Q08945		0	1.39307e+08	0	0.0005868	2.32077	2	1205.65	-2.22571	69.1148	0
	High	GFIYVHKPPVHIR	2	1	1	Q08945		0	9.55396e+07	0	0.001064	2.31715	2	1562.89	-3.46733	41.7067	0
	High	KITVPGNFQGHSGAQcITcSYK	2	1	1	Q08945	C16(Carbamidomethyl); C19(Carbamidomethyl)	0	4.03074e+07	0	0.0005669	2.30974	3	2453.16	-2.15241	51.0584	1
	High	SDHPGISITDLSK	1	2	1	Q08945		0	49984064	0.001	0.006842	1.72558	2	1369.69	-2.04465	52.6687	0
	High	RVALGHGLK	2	2	1	Q08945		0	9.84163e+06	0.002	0.007276	3.36329	3	950.587	-2.32268	22.3102	1
	High	SFDFEIETK	1	1	1	Q08945		0	1.26034e+08	0.002	0.007692	2.25424	2	1115.52	-1.76969	69.6921	0
	High	QGTQYTFSSIER	1	1	1	Q08945		0	6.04059e+07	0.002	0.009172	1.70836	2	1416.67	-4.45151	52.1728	0
	High	LFDFVNAK	1	2	1	Q08945		0	1.18142e+08	0.002	0.007594	1.65556	2	953.51	0.448641	70.9853	0
	High	EKIKSDHPGISITDLSK	1	2	1	Q08945		0	2.42339e+07	0.008	0.08882	2.22265	3	1868	-4.39277	41.6377	2
	High	LFLLPHKDQR	1	2	1	Q08945		0	1.98316e+07	0.008	0.08793	1.90663	2	1266.73	-3.11077	38.1697	1
	High	LFLLPHK	1	2	1	Q08945		0	1.82892e+07	0.009	0.09678	1.77183	2	867.543	-2.28563	50.093	0
Q15797	Mothers against decapentaplegic homolog 1 OS=Homo sapiens OX=9606 GN=SMAD1 PE=1 SV=1 - [SMAD1_HUMAN]	59.7062	33.12	8	5	12	21	5.72718e+08	465	52.2265	7.31299
	A2	Sequence	# PSMs	# Proteins	# Protein Groups	Protein Group Accessions	Modifications	ΔCn	Area	q-Value	PEP	XCorr	Charge	MH+ [Da]	ΔM [ppm]	RT [min]	# Missed Cleavages
	High	VGEAFHASSTSVLVDGFTDPSNNK	2	4	2	Q6I9T1;Q15797		0	4.09826e+08	0	0.0001394	4.30203	2	2479.17	-2.77741	79.3623	0
	High	HWcSIVYYELNNR	3	4	2	Q6I9T1;Q15797	C3(Carbamidomethyl)	0	9.35613e+07	0	0.0001394	3.63702	3	1753.81	-2.24939	72.5049	0
	High	FcLGLLSNVNR	2	14	5	B7Z5N5;Q6I9T1;Q15797;Q59F45;A0A024RDR3	C2(Carbamidomethyl)	0	5.65115e+08	0	0.0001394	3.38694	2	1292.67	-2.45461	84.2408	0
	High	IFNNQEFAQLLAQSVNHGFETVYELTK	1	1	1	Q15797		0	1.5417e+07	0	0.0001394	3.18142	3	3140.56	-1.71995	103.106	0
	High	HSEYNPQHSLLAQFR	1	1	1	Q15797		0	4.12148e+07	0	8.716e-06	3.13874	2	1826.89	-1.63935	51.0602	0
	High	RVESPVLPPVLVPR	4	3	2	Q6I9T1;Q15797		0	6.08666e+08	0	0.001857	3.01039	2	1557.94	-3.09041	75.5912	1
	High	GDVQAVAYEEPK	1	1	1	Q15797		0	3.57705e+07	0	0.0002337	2.99042	2	1305.63	-2.00447	41.2108	0
	High	VESPVLPPVLVPR	3	3	2	Q6I9T1;Q15797		0	5.44374e+08	0	0.0001394	2.86085	3	1401.84	-2.75838	91.7655	0
	High	VGEAFHASSTSVLVDGFTDPSNNKNR	1	1	1	Q15797		0	3.11898e+06	0.002	0.007069	3.26619	3	2749.3	-5.64219	70.0752	1
	High	ALScPGQPSNcVTIPR	1	5	1	Q15797	C4(Carbamidomethyl); C11(Carbamidomethyl)	0	1.33317e+07	0.002	0.008682	2.54454	3	1756.84	-1.78394	56.0519	0
	High	KGLPHVIYcR	1	17	5	B7Z5N5;Q6I9T1;Q15797;Q59F45;A0A024RDR3	C9(Carbamidomethyl)	0	55570772	0.003	0.02653	2.07117	2	1242.67	-5.85804	30.5222	1
	High	EVcINPYHYK	1	5	2	Q6I9T1;Q15797	C3(Carbamidomethyl)	0	6.41002e+07	0.007	0.07518	2.05728	2	1322.62	-1.29721	42.4541	0
A0A4D5RAC7	Tr-type G domain-containing protein OS=Homo sapiens OX=9606 PE=4 SV=1 - [A0A4D5RAC7_HUMAN]	59.2597	45.41	73	11	13	22	8.5075e+08	425	46.1811	9.02686
	A2	Sequence	# PSMs	# Proteins	# Protein Groups	Protein Group Accessions	Modifications	ΔCn	Area	q-Value	PEP	XCorr	Charge	MH+ [Da]	ΔM [ppm]	RT [min]	# Missed Cleavages
	High	VETGVLKPGmVVTFAPVNVTTEVK	3	34	2	A0A4D5RAC7;Q14222	M10(Oxidation)	0	9.87023e+08	0	0.0001394	3.81103	3	2531.37	-2.97118	89.4555	0
	High	YEEIVKEVSTYIKK	1	31	1	A0A4D5RAC7		0	1.30094e+07	0	0.0001394	3.68152	4	1728.94	-1.32185	65.8483	2
	High	THINIVVIGHVDSGK	4	51	1	A0A4D5RAC7		0	72188283	0	1.117e-05	3.54057	2	1588.88	-1.13257	49.3074	0
	High	EHALLAYTLGVK	3	38	1	A0A4D5RAC7		0	3.61985e+08	0	0.0001394	3.48039	3	1314.74	-1.33789	64.9851	0
	High	SGDAAIVDmVPGKPmcVESFSDYPPLGR	2	38	1	A0A4D5RAC7	M9(Oxidation); M15(Oxidation); C16(Carbamidomethyl)	0	195166608	0	0.0001394	3.378	3	3027.39	-0.85358	89.1092	0
	High	KDGNASGTTLLEALDcILPPTRPTDKPLR	1	34	1	A0A4D5RAC7	C16(Carbamidomethyl)	0	2.77084e+07	0	0.0002248	3.12811	5	3149.65	-2.96567	97.8519	1
	High	YYVTIIDAPGHR	2	35	1	A0A4D5RAC7		0	2.75532e+08	0	0.001165	2.89993	3	1404.72	-1.93842	56.9787	0
	High	IGGIGTVPVGR	1	39	2	A0A4D5RAC7;Q14222		0	1.20324e+09	0	0.0006212	2.64111	2	1025.61	-2.3748	52.7732	0
	High	DGNASGTTLLEALDcILPPTRPTDKPLR	1	35	1	A0A4D5RAC7	C15(Carbamidomethyl)	0	28444326	0	0.0003689	2.52301	4	3021.57	-0.562191	100.546	0
	High	LPLQDVYK	1	40	1	A0A4D5RAC7		0	259841440	0	0.002639	2.06487	2	975.549	-1.91834	54.6301	0
	High	IGYNPDTVAFVPISGWNGDNmLEPSANmPWFK	1	35	1	A0A4D5RAC7	M21(Oxidation); M28(Oxidation)	0	1.55631e+07	0.002	0.01044	2.91227	4	3599.64	-5.73881	101.829	0
	High	QLIVGVNK	1	37	1	A0A4D5RAC7		0	1.76837e+08	0.002	0.01028	1.32574	2	870.538	-3.24037	38.5584	0
	High	YEEIVKEVSTYIK	1	31	1	A0A4D5RAC7		0	2.65523e+07	0.004	0.04082	2.05789	3	1600.84	-2.94474	76.9773	1
[truncated: 5,707 more rows]
